# Supplementary material for: Growing up is hard to do: a demographic model of survival and growth of Caribbean octocoral recruits
Source: PeerJ. 2022 Nov 18;10:e14386. doi: 10.7717/peerj.14386 (PMC9677878; doi:10.7717/peerj.14386)
Supplement: Supplemental Information 2 [file peerj-10-14386-s002.xlsm]

## Sheet: Growth rates
Summary data by Month										Summary data by size class and month									Summary data by size class
Month	sizeclass	mean	SD	N	growth (pos, 0, neg)				Month	sizeclass	mean	SD	N	growth					sizeclass	mean	SD	N	growth (pos, 0, neg)
6	1 pol	0.02	NA	1	positive				6	< 0.6	-0.025	0.0057735	4	negative	-0.1	0.023094	0.000133333		1 pol	0	0	0	1
6	< 0.6	-0.025	0.0057735	4	negative				11	< 0.6	-0.0245455	0.021856	2	negative	-0.0490909	0.0437121	0.000955372		1 pol	0.02	0	0	1
6	< 0.6	0.114412	0.116364	34	positive				23	< 0.6	-0.0333333	0	1	negative	-0.0333333	0	0		< 0.6	negative	-0.0260606	0.0124711	7
6	< 0.6	0	0	11	no-growth				6	< 0.6	0	0	11	no-growth	0	0	0		< 0.6	no-growth	0	0	0
6	0.6-1.1	-0.051	0.0328126	10	negative				11	< 0.6	0	0	4	no-growth	0	0	0		< 0.6	positive	0.121409	0.082877	59
6	0.6-1.1	0.118235	0.114468	17	positive				15	< 0.6	0	0	4	no-growth	0	0	0		0.6-1.1	negative	-0.0837037	0.0433494	9
6	0.6-1.1	0	0	8	no-growth				6	< 0.6	0.114412	0.116364	34	positive	3.89	3.95637	0.460379		0.6-1.1	no-growth	0	0	3
6	1.2-2	-0.0921429	0.0549375	14	negative				11	< 0.6	0.151152	0.180766	15	positive	2.26727	2.71148	0.490143		0.6-1.1	positive	0.127669	0.107237	6
6	1.2-2	0.184074	0.12816	27	positive				15	< 0.6	0.1	0	1	positive	0.1	0	0		1.2-2	negative	-0.099248	0.0725358	5
6	1.2-2	0	0	4	no-growth				20	< 0.6	0.09	0.0503322	4	positive	0.36	0.201329	0.0101333		1.2-2	no-growth	0	0.0250217	14
6	2.1-5	-0.313333	0.140238	6	negative				23	< 0.6	0.148611	0.128042	3	positive	0.445833	0.384125	0.049184		1.2-2	positive	0.173835	0.139529	12
6	2.1-5	0.223889	0.199621	18	positive				31	< 0.6	0.05	0.0353553	2	positive	0.1	0.0707107	0.0025		2.1-5	negative	-0.281642	0.197103	13
6	2.1-5	0	0	2	no-growth				15	> 5	-1.325	0	1	negative	-1.325	0	0		2.1-5	no-growth	0	0	10
11	1 pol	0	NA	1	no-growth				20	> 5	-0.606667	0.351188	3	negative	-1.82	1.05357	0.37		2.1-5	positive	0.225752	0.164954	20
11	< 0.6	-0.0245455	0.021856	2	negative				23	> 5	-1.43235	1.6513	2	negative	-2.86471	3.3026	5.4536		> 5	negative	-1.00162	0.98519	6
11	< 0.6	0.151152	0.180766	15	positive				15	> 5	0	0	2	no-growth	0	0	0		> 5	no-growth	-0.572941	1.04438	5
11	< 0.6	0	0	4	no-growth				20	> 5	0	0	1	no-growth	0	0	0		> 5	positive	0.685833	0.68	4
11	0.6-1.1	-0.0559091	0.0234206	8	negative				11	> 5	0.12	0	1	positive	0.12	0	0
11	0.6-1.1	0.110076	0.11156	24	positive				15	> 5	0.375	0	1	positive	0.375	0	0
11	0.6-1.1	0	0	11	no-growth				20	> 5	0.16	0	1	positive	0.16	0	0
11	1.2-2	-0.08875	0.0568065	16	negative				23	> 5	0.133333	0	1	positive	0.133333	0	0
11	1.2-2	0.126853	0.117027	13	positive				31	> 5	0.45	0	1	positive	0.45	0	0
11	1.2-2	0	0	2	no-growth				36	> 5	1.08	0.961665	2	positive	2.16	1.92333	1.8496
11	2.1-5	-0.245939	0.127822	15	negative				6	0.6-1.1	-0.051	0.0328126	10	negative	-0.51	0.328126	0.0107667
11	2.1-5	0.234	0.135507	20	positive				11	0.6-1.1	-0.0559091	0.0234206	8	negative	-0.447273	0.187365	0.00438819
11	2.1-5	0	0	3	no-growth				15	0.6-1.1	-0.08	0.032596	5	negative	-0.4	0.16298	0.0053125
11	> 5	0.12	NA	1	positive				20	0.6-1.1	-0.06	0.0282843	2	negative	-0.12	0.0565685	0.0016
15	< 0.6	0.1	NA	1	positive				23	0.6-1.1	-0.116667	0.0707107	2	negative	-0.233333	0.141421	0.01
15	< 0.6	0	0	4	no-growth				6	0.6-1.1	0	0	8	no-growth	0	0	0
15	0.6-1.1	-0.08	0.032596	5	negative				11	0.6-1.1	0	0	11	no-growth	0	0	0
15	0.6-1.1	0.28125	0.123111	4	positive				15	0.6-1.1	0	0	12	no-growth	0	0	0
15	0.6-1.1	0	0	12	no-growth				20	0.6-1.1	0	0	2	no-growth	0	0	0
15	1.2-2	-0.05	0.0353553	2	negative				23	0.6-1.1	0	0	1	no-growth	0	0	0
15	1.2-2	0.154167	0.0967169	6	positive				31	0.6-1.1	0	0	1	no-growth	0	0	0
15	1.2-2	0	0	10	no-growth				36	0.6-1.1	0	0	1	no-growth	0	0	0
15	2.1-5	-0.395833	0.227715	6	negative				6	0.6-1.1	0.118235	0.114468	17	positive	2.01	1.94596	0.22275
15	2.1-5	0.3625	0.171391	4	positive				11	0.6-1.1	0.110076	0.11156	24	positive	2.64182	2.67743	0.298693
15	2.1-5	0	0	8	no-growth				15	0.6-1.1	0.28125	0.123111	4	positive	1.125	0.492443	0.060625
15	> 5	-1.325	NA	1	negative				20	0.6-1.1	0.15	0.0886942	4	positive	0.6	0.354777	0.0314667
15	> 5	0.375	NA	1	positive				23	0.6-1.1	0.1	0.0666667	3	positive	0.3	0.2	0.0133333
15	> 5	0	0	2	no-growth				31	0.6-1.1	0.0625	0.053033	2	positive	0.125	0.106066	0.005625
20	< 0.6	0.09	0.0503322	4	positive				36	0.6-1.1	0.22	0	1	positive	0.22	0	0
20	0.6-1.1	-0.06	0.0282843	2	negative				11	1 pol	0	0	1	no-growth	0	0	0
20	0.6-1.1	0.15	0.0886942	4	positive				6	1 pol	0.02	0	1	positive	0.02	0	0
20	0.6-1.1	0	0	2	no-growth				6	1.2-2	-0.0921429	0.0549375	14	negative	-1.29	0.769125	0.0422538
20	1.2-2	-0.145	0.161967	4	negative				11	1.2-2	-0.08875	0.0568065	16	negative	-1.42	0.908905	0.0516317
20	1.2-2	0.156	0.140996	5	positive				15	1.2-2	-0.05	0.0353553	2	negative	-0.1	0.0707107	0.0025
20	1.2-2	0	0	2	no-growth				20	1.2-2	-0.145	0.161967	4	negative	-0.58	0.647868	0.104933
20	2.1-5	-0.285	0.232194	8	negative				23	1.2-2	-0.233333	0	2	negative	-0.466667	0	0
20	2.1-5	0.233333	0.0986577	3	positive				31	1.2-2	-0.0125	0	1	negative	-0.0125	0	0
20	2.1-5	0	NA	1	no-growth				36	1.2-2	-0.1	0.0848528	2	negative	-0.2	0.169706	0.0144
20	> 5	-0.606667	0.351188	3	negative				6	1.2-2	0	0	4	no-growth	0	0	0
20	> 5	0.16	NA	1	positive				11	1.2-2	0	0	2	no-growth	0	0	0
20	> 5	0	NA	1	no-growth				15	1.2-2	0	0	10	no-growth	0	0	0
23	< 0.6	-0.0333333	NA	1	negative				20	1.2-2	0	0	2	no-growth	0	0	0
23	< 0.6	0.148611	0.128042	3	positive				6	1.2-2	0.184074	0.12816	27	positive	4.97	3.46033	0.443477
23	0.6-1.1	-0.116667	0.0707107	2	negative				11	1.2-2	0.126853	0.117027	13	positive	1.64909	1.52136	0.17804
23	0.6-1.1	0.1	0.0666667	3	positive				15	1.2-2	0.154167	0.0967169	6	positive	0.925	0.580302	0.056125
23	0.6-1.1	0	NA	1	no-growth				20	1.2-2	0.156	0.140996	5	positive	0.78	0.704982	0.0994
23	1.2-2	-0.233333	0	2	negative				23	1.2-2	0.271429	0.194773	7	positive	1.9	1.36341	0.265556
23	1.2-2	0.271429	0.194773	7	positive				31	1.2-2	0.0625	0.05	3	positive	0.1875	0.15	0.0075
23	2.1-5	-0.441667	0.404031	4	negative				36	1.2-2	0.27	0.296985	2	positive	0.54	0.59397	0.1764
23	2.1-5	0.204167	0.140789	8	positive				6	2.1-5	-0.313333	0.140238	6	negative	-1.88	0.841427	0.118
23	2.1-5	0	NA	1	no-growth				11	2.1-5	-0.245939	0.127822	15	negative	-3.68909	1.91732	0.245075
23	> 5	-1.43235	1.6513	2	negative				15	2.1-5	-0.395833	0.227715	6	negative	-2.375	1.36629	0.311125
23	> 5	0.133333	NA	1	positive				20	2.1-5	-0.285	0.232194	8	negative	-2.28	1.85756	0.431314
31	< 0.6	0.05	0.0353553	2	positive				23	2.1-5	-0.441667	0.404031	4	negative	-1.76667	1.61612	0.652963
31	0.6-1.1	0.0625	0.053033	2	positive				31	2.1-5	-0.1875	0.129422	6	negative	-1.125	0.776531	0.1005
31	0.6-1.1	0	NA	1	no-growth				36	2.1-5	-0.134359	0.0439562	3	negative	-0.403077	0.131869	0.00579645
31	1.2-2	-0.0125	NA	1	negative				6	2.1-5	0	0	2	no-growth	0	0	0
31	1.2-2	0.0625	0.05	3	positive				11	2.1-5	0	0	3	no-growth	0	0	0
31	2.1-5	-0.1875	0.129422	6	negative				15	2.1-5	0	0	8	no-growth	0	0	0
31	2.1-5	0.189583	0.231222	6	positive				20	2.1-5	0	0	1	no-growth	0	0	0
31	> 5	0.45	NA	1	positive				23	2.1-5	0	0	1	no-growth	0	0	0
36	0.6-1.1	0.22	NA	1	positive				6	2.1-5	0.223889	0.199621	18	positive	4.03	3.59318	0.717276
36	0.6-1.1	0	NA	1	no-growth				11	2.1-5	0.234	0.135507	20	positive	4.68	2.71014	0.367242
36	1.2-2	-0.1	0.0848528	2	negative				15	2.1-5	0.3625	0.171391	4	positive	1.45	0.685565	0.1175
36	1.2-2	0.27	0.296985	2	positive				20	2.1-5	0.233333	0.0986577	3	positive	0.7	0.295973	0.0292
36	2.1-5	-0.134359	0.0439562	3	negative				23	2.1-5	0.204167	0.140789	8	positive	1.63333	1.12631	0.158571
36	2.1-5	0.173846	0.0983846	6	positive				31	2.1-5	0.189583	0.231222	6	positive	1.1375	1.38733	0.320781
36	> 5	1.08	0.961665	2	positive				36	2.1-5	0.173846	0.0983846	6	positive	1.04308	0.590308	0.0580772

## Sheet: Recruit survival model
															Survival (per 6 months)		initial size class	final size class	# of 0.1 cm intervals	bottom of source interval	destination interval		Mean Growth	Std Dev	N	change x survival	proportion changing	proportion in growth class	P[change class]
														< 0.6	0.586															0	0.1	0.2	0.3	0.4	0.5	0.6	0.7	0.8	0.9	1	1.1	1.2	1.3	1.4	1.5	1.6	1.7	1.8	1.9
							1	2	3	4	5			0.6 - 1	0.622
							< 0.6	0.6 - 1	1.1 - 2	2.1 - 5	>5		1	1.1 - 2	0.676		1	1	3	0.3	0.5	< 0.6			5			0.0657895
						< 0.6	0.416512	0.072024	0.0240659	0.0313141	0		1	2.1 - 5	0.79		1	1	3	0.3	0.5	< 0.6	0	0	16	0.416512	0.710771	0.210526	1
						0.6 - 1	0.0949846	0.373935	0.098898	0.0235749	0			>5	1		1	2	3	0.3	0.6	< 0.6	-2.46678	0.877874	55	0.0949846	0.16209	0.723684	0.223979	0.306487	0.404112	0.488385
						1.1 - 2	0.0537542	0.0840687	0.355797	0.0590856	0						1	3	3	0.3	1.1		-2.46678	0.877874	55	0.0537542	0.0917307	0.723684	0.126755	0.115791	0.175365	0.235893
						2.1 - 5	0.0189213	0.0761336	0.146292	0.468553	0				Growth rates		1	4	3	0.3	2.1		-2.46678	0.877874	55	0.0189213	0.032289	0.723684	0.0446175	0.0266258	0.0474835	0.0726742
						>5	0.00182792	0.0158391	0.0509467	0.207473	1						1	5	3	0.3	5		-2.46678	0.877874	55	0.00182792	0.00311931	0.723684	0.00431032	0.00174422	0.00393095	0.00725579
															0.0848574		2	1	6	0.6	0.5	0.6-1.1	-1.09028	0.514055	27	0.072024	0.115794	0.221311	0.523218	0.990821	0.843736	0.587521	0.367508	0.219896	0.129825
							0.586	0.622	0.676	0.79	1				-0.336123		2	2	6	0.6	1.1	0.6-1.1			35	0.373935	0.601181	0.286885	1
															0		2	3	6	0.6	1.2	0.6-1.1	-0.590931	0.775312	60	0.0840687	0.135159	0.491803	0.274823	0.479812	0.52256	0.561807	0.597728	0.630535	0.66046
															0.553811		2	4	6	0.6	2.1	0.6-1.1	-0.590931	0.775312	60	0.0761336	0.122401	0.491803	0.248883	0.219933	0.252956	0.285615	0.317635	0.348814	0.379012
															-0.46358		2	5	6	0.6	5	0.6-1.1	-0.590931	0.775312	60	0.0158391	0.0254648	0.491803	0.0517783	0.0292904	0.037202	0.0459801	0.0555544	0.0658504	0.0767927
															0		3	1	9	1.2	0.5	1.2-2	-0.768777	0.603816	40	0.0240659	0.0356004	0.353982	0.100571	0.247463	0.183093	0.135948	0.101474	0.0762088	0.0576113	0.0438453	0.033592	0.0259054
															0.866733		3	2	9	1.2	1.1	1.2-2	-0.768777	0.603816	40	0.098898	0.146299	0.353982	0.413294	0.99446	0.918076	0.764466	0.596502	0.450162	0.334616	0.247463	0.183093	0.135948
		5.08608	proportion at size escape after 5 y							0.000242365					-1.32191		3	3	9	1.2	2	1.2-2			17	0.355797	0.526327	0.150442	1
		2.95103	=average age to grow to 5 cm							0					0		3	4	9	1.2	2.1	1.2-2	-0.143024	0.684862	56	0.146292	0.216409	0.495575	0.436682	0.490699	0.518217	0.544413	0.569301	0.592904	0.615257	0.636401	0.656381	0.675248
															1.13773		3	5	9	1.2	5	1.2-2	-0.143024	0.684862	56	0.0509467	0.075365	0.495575	0.152076	0.0985261	0.111043	0.12402	0.137398	0.151116	0.165119	0.179355	0.193774	0.20833
																	4	1	40	2.1	0.5	2.1-5	0.279076	0.641147	47	0.0313141	0.0396381	0.379032	0.104577	0.382932	0.347401	0.315082	0.285756	0.259195	0.23517	0.213457	0.193845	0.176135	0.160144	0.145704	0.132661	0.120875	0.11022	0.100584	0.091862	0.0839637	0.0768059	0.0703148	0.0644237
																	4	2	40	2.1	1.1	2.1-5	0.279076	0.641147	47	0.0235749	0.0298417	0.379032	0.0787312	0.668319	0.612799	0.559976	0.510397	0.464334	0.421863	0.382932	0.347401	0.315082	0.285756	0.259195	0.23517	0.213457	0.193845	0.176135	0.160144	0.145704	0.132661	0.120875	0.11022
							Empiriical Matrix										4	3	40	2.1	2	2.1-5	0.279076	0.641147	47	0.0590856	0.0747919	0.379032	0.197323	0.999972	0.998388	0.989642	0.968868	0.935288	0.891028	0.8393	0.783279	0.725616	0.668319	0.612799	0.559976	0.510397	0.464334	0.421863	0.382932	0.347401	0.315082	0.285756	0.259195
							0.19802	0.0543478	0.0114943	0.0192308	0						4	4	40	2.1	5	2.1-5			15	0.468553	0.593105	0.120968	1
							0.207921	0.23913	0.126437	0.0769231	0						4	5	40	2.1	5	2.1-5	0.129034	0.635026	62	0.207473	0.262624	0.5	0.525247	0.246884	0.262249	0.277616	0.292951	0.308224	0.32341	0.338482	0.353421	0.368206	0.38282	0.397248	0.411476	0.425494	0.439291	0.452859	0.466192	0.479282	0.492127	0.504723	0.517066
							0.049505	0.108696	0.16092	0.0384615	0
							0.039604	0.0978261	0.229885	0.442308	0
							0	0	0	0.0769231	1
						suvival	0.49505	0.5	0.528736	0.653846	1
																					< 0.6	0.6 - 1	1.1 - 2	2.1 - 5
																				< 0.6	0.416512	0.072024	0.0240659	0.0313141
																				0.6 - 1	0.0949846	0.373935	0.098898	0.0235749
																				1.1 - 2	0.0537542	0.0840687	0.355797	0.0590856
																				2.1 - 5	0.0189213	0.0761336	0.146292	0.468553
																				>5	0.00182792	0.0158391	0.0509467	0.207473
																				survival	0.586	0.622	0.676	0.79
																1.97218	7.8023
									modal year survival without negative grwoth		1		2		3		4		5		6		7		8		9		10
							0.3 -0.5		0	0.5	1	1.5	2	2.5	3	3.5	4	4.5	5	5.5	6	6.5	7	7.5	8	8.5	9	9.5	10
								0.3 - 0.5	100	41.6512	18.221	8.39303	4.06741	2.06514	1.09127	0.595589	0.333265	0.189976	0.109765	0.0640354	0.0376128	0.0221989	0.0131458	0.007803	0.00463928	0.00276146	0.00164504	0.000980526	0.000584674
								0.6 - 1.1	0	9.49846	8.08425	5.32936	3.22611	1.88981	1.09487	0.633586	0.367804	0.214507	0.125697	0.0739674	0.0436787	0.0258641	0.0153477	0.00912171	0.00542774	0.00323247	0.00192628	0.00114842	0.000684885
								1.2 - 2	0	5.37542	5.0618	3.6482	2.38586	1.49202	0.912241	0.551228	0.331023	0.198141	0.118405	0.0706981	0.0421969	0.0251818	0.015027	0.00896728	0.0053513	0.00319352	0.00190586	0.00113742	0.000678831
								2.1 - 5	0	1.89213	3.1842	3.19271	2.59421	1.88713	1.28545	0.839757	0.533618	0.332762	0.204829	0.124942	0.0757274	0.0456925	0.0274824	0.0164925	0.00988157	0.0059139	0.00353651	0.00211364	0.00126273
								5	0	0.182792	1.0758	2.15567	3.10369	3.822	4.32325	4.65576	4.86919	5.0032	5.08608	5.1368	5.16761	5.18623	5.19745	5.20418	5.20822	5.21064	5.21208	5.21295	5.21346
								recruits	100	58.4172	34.5512	20.5633	12.2736	7.3341	4.38382	2.62016	1.56571	0.935387	0.558696	0.333642	0.199216	0.118937	0.0710029	0.0423845	0.0252999	0.0151014	0.00901369	0.00538	0.00321112		average age of recruits in the class
								all	100	58.6	35.627	22.719	15.3773	11.1561	8.70707	7.27592	6.4349	5.93859	5.64478	5.47044	5.36683	5.30517	5.26845	5.24657	5.23352	5.22574	5.2211	5.21833	5.21667		at	at	at
								delta 5 cm		0.182792	0.893008	1.07987	0.948019	0.718313	0.501249	0.332507	0.213434	0.13401	0.0828786	0.0507203	0.0308124	0.0186217	0.0112131	0.00673454	0.00403734	0.00241724	0.00144592	0.000864344	0.000516452		settlement	plus 6 months	plus 1 yr
																															0.250278	0.784904	1.32275	0.3 - 0.5 cm
								Average sixe		0.683999	0.966784	1.21084	1.40678	1.55774	1.6711	1.75482	1.81594	1.86021	1.89208	1.91492	1.93124	1.94286	1.95112	1.95699	1.96115	1.96409	1.96618	1.96765	1.96869		1.51039	1.17562	1.5444	0.6 - 1.1 cm
																															1.59872	1.3059	1.64443	1.2 - 2 cm
						Number graduating		Increase in >5 cm		0.182792	0.893008	1.07987	0.948019	0.718313	0.501249	0.332507	0.213434	0.13401	0.0828786	0.0507203	0.0308124	0.0186217	0.0112131	0.00673454	0.00403734	0.00241724	0.00144592	0.000864344	0.000516452		1.89055	1.82817	1.97218	2- 5 cm
								Weighted increase		0.0913958	0.893008	1.6198	1.89604	1.79578	1.50375	1.16377	0.853736	0.603047	0.414393	0.278962	0.184875	0.121041	0.0784917	0.0505091	0.0322987	0.0205465	0.0130133	0.00821127	0.00516452
								Weighted age of recruits		29.2086	34.5512	30.845	24.5472	18.3352	13.1515	9.17056	6.26284	4.20924	2.79348	1.83503	1.19529	0.773092	0.49702	0.317884	0.202399	0.128361	0.0811233	0.05111	0.0321112		0.530259	1.03769	1.5245	average age of recruits at 5 y
								Proportion of available that grew to >5cm in the time interval		0.00312907	0.0258459	0.0525144	0.0772405	0.0979415	0.114341	0.126903	0.136318	0.143267	0.148343	0.15202	0.154669	0.156568	0.157925	0.158892	0.159579	0.160068	0.160414	0.160659	0.160832				1.55319	average age of recruits at 10 y
								Steady State Recruitment																							3.05779
								0.3 - 0.5	100	41.6512	18.221	50.0442	22.2884	52.1094	23.3796	52.7049	23.7129	52.8949	23.8227	52.959	23.8603	52.9812	23.8734	52.989	23.8781	52.9917	23.8797	52.9927	23.8803		9.02363
								0.6 - 1.1	0	9.49846	8.08425	14.8278	11.3104	16.7176	12.4052	17.3512	12.773	17.5657	12.8987	17.6397	12.9424	17.6656	12.9578	17.6747	12.9632	17.6779	12.9651	17.6791	12.9658
								1.2 - 2	0	5.37542	5.0618	9.02362	7.44766	10.5156	8.3599	11.0669	8.69092	11.265	8.80933	11.3357	8.85153	11.3609	8.86655	11.3699	8.8719	11.373	8.87381	11.3742	8.87449
								2.1 - 5	0	1.89213	3.1842	5.08485	5.77841	6.97198	7.06385	7.81174	7.59747	8.1445	7.8023	8.26944	7.87803	8.31514	7.90551	8.33163	7.91539	8.33754	7.91893	8.33966	7.92019
								5	0	0.182792	1.0758	2.33846	4.17949	6.16046	8.50273	10.8162	13.3719	15.8194	18.458	20.9562	23.6256	26.1424	28.8231	31.3466	34.0313	36.5573	39.2434	41.7702	44.4568
								Number alive	100	58.4172	34.5512	78.9805	46.8248	86.3146	51.2086	88.9348	52.7743	89.8702	53.333	90.2038	53.5322	90.3227	53.6032	90.3651	53.6285	90.3802	53.6376	90.3856	53.6408
								Number graduating		0.182792	0.893008	1.26266	1.84103	1.98097	2.34228	2.31348	2.55571	2.44749	2.63859	2.49821	2.6694	2.51683	2.68061	2.52357	2.68465	2.52598	2.6861	2.52685	2.68661
																													0.535128
								SIZE CLASS DISTRIBUTION								5y
									5 yr	6 yr	7 yr	8 yr	9 yr	10 yr
								0.3 - 0.5	0.446678	0.445718	0.445373	0.445249	0.445205	0.445189
								0.6 - 1.1	0.241853	0.241769	0.241735	0.241722	0.241717	0.241715
								1.2 - 2.0	0.165176	0.165349	0.165411	0.165433	0.16544	0.165443
								2.1 - 5.0	0.146294	0.147164	0.147482	0.147597	0.147638	0.147652
								Steady State Recruitment (100 new recruits added to preceding size class 1)
								0.3 - 0.5	100	41.6512	118.221	50.0442	122.288	52.1094	123.38	52.7049	123.713	52.8949	123.823	52.959	123.86	52.9812	123.873	52.989	123.878	52.9917	123.88	52.9927	123.88
								0.6 - 1.1	0	9.49846	8.08425	14.8278	11.3104	16.7176	12.4052	17.3512	12.773	17.5657	12.8987	17.6397	12.9424	17.6656	12.9578	17.6747	12.9632	17.6779	12.9651	17.6791	12.9658
								1.2 - 2	0	5.37542	5.0618	9.02362	7.44766	10.5156	8.3599	11.0669	8.69092	11.265	8.80933	11.3357	8.85153	11.3609	8.86655	11.3699	8.8719	11.373	8.87381	11.3742	8.87449
								2.1 - 5	0	1.89213	3.1842	5.08485	5.77841	6.97198	7.06385	7.81174	7.59747	8.1445	7.8023	8.26944	7.87803	8.31514	7.90551	8.33163	7.91539	8.33754	7.91893	8.33966	7.92019
								5	0	0.182792	1.0758	2.33846	4.17949	6.16046	8.50273	10.8162	13.3719	15.8194	18.458	20.9562	23.6256	26.1424	28.8231	31.3466	34.0313	36.5573	39.2434	41.7702	44.4568
																				Comparison of model predictions to abundances of recruits at Grootpan Bay
																				Grootpan 2016	model		grootpan	model prediction
																			< 0.6	0.601286	0.446678		187	23.8227		210.823
																			0.6 - 1.1	0.163987	0.241853		51	12.8987		63.8987
																			1.2 - 2	0.096463	0.165176		30	8.80933		38.8093
																			2.1 - 5	0.138264	0.146294		43	7.8023		50.8023
																							311	53.333		364.333
																				expected			194.314	18.3893		(o-e)/e^2	0.275299	1.60535
																							47.6855	17.7871			0.230384	1.34343
																							27.1672	13.66			0.295389	1.7225
																							42.6375	8.18585			0.00308199	0.017972
																													chi-square
																											0.804154	4.68925	5.4934
																													0.139034
[truncated: 21 more columns]
