# Supplementary material for: Growing up is hard to do: a demographic model of survival and growth of Caribbean octocoral recruits
Source: PeerJ. 2022 Nov 18;10:e14386. doi: 10.7717/peerj.14386 (PMC9677878; doi:10.7717/peerj.14386)
Supplement: Supplemental Information 3 [file peerj-10-14386-s003.xlsx]

## Sheet: overall
event	(Multiple Items)
genus	(Multiple Items)
																					Observed transitions
Count of height	Column Labels											1	2	3	4	5	NA	#N/A	Grand Total				1	2	3	4	5
Row Labels	1	2	3	4	5	NA	#N/A	Grand Total			1	27	14	3	4	2	100		150		Size Class	1	0.194245	0.0645161	0.0172414	0.0240964	0
1	27	14	3	4	2	100		150			2	31	71	29	12		104		247		<0.6 cm	2	0.223022	0.327189	0.166667	0.0722892	0
2	31	71	29	12		104		247			3	12	21	48	13	1	91		186		"0.6 -1.1 cm	3	0.0863309	0.0967742	0.275862	0.0783133	0
3	12	21	48	13	1	91		186			4	6	15	32	85	1	47	2	188		1.1 -2.0 cm	4	0.0431655	0.0691244	0.183908	0.512048	0
4	6	15	32	85	1	47	2	188			5				11	5		5	21		2.1 – 5.0 cm	5	0	0	0	0.0662651	1
5				11	5		5	21			0	63	96	62	41	2	1		265
0	63	96	62	41	2	1		265				139	217	174	166	11	343	7	1057		survival		0.546763	0.557604	0.643678	0.753012
Grand Total	139	217	174	166	11	343	7	1057				139	217	174	166	11	343	7	1057
																							survival based on Cox analysis
									2
									5		4			number of non-mortality cases									size_class mean_6 SD_6 mean_12 SD_12
									18		15			434									1	< 0.6	0.586	0.0107	0.404	0.0107
	0.0306407								61		43												2	0.6 - 1	0.622	0.0122	0.447	0.0122
									260		231			number of cases									3	1.1 - 2	0.676	0.021	0.515	0.0210
								1	105		95			707									4	2.1 - 5	0.79	0.0427	0.850	0.0427
								2	28		27
								3	6		6
								4	0
								5	0
6 Month interval data
event	(Multiple Items)
genus	(Multiple Items)
interval	6
Count of height	Column Labels
Row Labels	1	2	3	4	Grand Total							Row Labels	1	2	3	4	Grand Total
0	44	43	33	14	134							0	44	43	33	14	134
1	15	5	1	1	22							1	15	5	1	1	22					Size Class	1	0.172414	0.060241	0.0138889	0.025
2	19	20	9	3	51							2	19	20	9	3	51					<0.6 cm	2	0.218391	0.240964	0.125	0.075
3	5	6	12	2	25							3	5	6	12	2	25					"0.6 -1.1 cm	3	0.0574713	0.0722892	0.166667	0.05
4	4	9	17	16	46							4	4	9	17	16	46					1.1 -2.0 cm	4	0.045977	0.108434	0.236111	0.4
5				4	4							5	0	0	0	4	4					2.1 – 5.0 cm	5	0	0	0	0.1
Grand Total	87	83	72	40	282								43	40	39	26	148
												Grand Total	87	83	72	40	282					survival		0.494253	0.481928	0.541667	0.65	0
Row Labels	Count of rec.id
esp	647
EC100	4				0.0143541
EC101	2				0.0198675
EC102	2				0.0222222
EC103	2
EC104	2
EC105	3
EC106	5
EC109	2
EC11	2
EC111	2
EC112	4
EC113	8
EC114	3
EC118	2
EC119	2
EC120	2
EC121	2
EC122	2
EC124	2
EC125	5
EC126	4
EC129	2
EC130	2
EC131	2
EC132	2
EC133	3
EC134	3
EC135	3
EC136	4
EC138	2
EC14	2
EC140	4
EC141	4
EC149	4
EC15	4
EC150	2
EC152	2
EC154	4
EC159	8
EC16	3
EC164	5
EC165	2
EC166	2
EC167	2
EC169	2
EC18	2
EC184	2
EC19	2
EC193	2
EC194	4
EC198	4
EC20	2
EC200	2
EC22	2
EC23	2
EC25	2
EC26	2
EC27	4
EC28	2
EC29	2
EC3	6
EC33	4
EC36	7
EC37	7
EC38	2
EC39	2
EC4	3
EC40	7
EC41	2
EC44	2
EC45	8
EC49	5
EC5	3
EC50	6
EC51	2
EC53	4
EC54	2
EC55	2
EC56	3
EC59	2
EC61	3
EC62	2
EC64	3
EC66	4
EC68	8
EC69	2
EC7	2
EC70	2
EC72	2
EC73	5
EC78	5
EC79	2
EC80	2
EC81	2
EC82	2
EC83	2
EC85	3
EC86	2
EC87	7
EC88	3
EC89	2
EC9	2
EC90	2
EC91	4
EC93	3
EC95	3
EC96	2
EC97	2
EU1	4
EU102	4
EU108	4
EU11	5
EU113	2
EU116	8
EU117	5
EU120	4
EU121	8
EU122	8
EU123	5
EU125	2
EU128	8
EU135	2
EU136	2
EU138	6
EU139	2
EU142	2
EU143	2
EU144	3
EU151	8
EU152	8
EU160	2
EU161	8
EU162	7
EU163	5
EU164	4
EU167	4
EU168	3
EU170	4
EU171	2
EU175	2
EU177	8
EU18	6
EU180	8
EU185	2
EU191	6
EU192	4
EU193	2
EU198	2
EU2	4
EU200	6
EU21	4
EU23	3
EU24	2
EU27	4
EU28	2
EU29	2
EU30	3
EU31	2
EU33	3
EU35	2
EU36	4
EU37	2
EU39	3
EU4	2
EU45	2
EU48	2
EU49	2
EU5	8
EU50	2
EU51	2
EU53	2
EU55	4
EU58	8
EU59	3
EU60	2
EU61	2
EU7	2
EU72	2
EU77	8
EU78	5
EU8	4
EU82	5
EU83	2
EU84	2
EU85	2
EU88	2
EU9	2
EU90	2
EU92	2
EU93	2
EU95	2
EU97	2
mpsp	11
EU148	2
EU149	2
EU158	2
EU159	2
EU174	3
msp	25
EC107	2
EC13	3
EC74	3
EU105	3
EU118	2
EU137	3
EU141	2
EU155	2
EU81	3
EU91	2
plexaura	12
EC60	2
EU101	3
EU62	3
EU66	2
EU71	2
pllsp	57
EC110	3
EC42	2
EC8	2
EC92	2
EU100	2
EU110	3
EU12	3
EU127	3
EU13	5
EU146	2
EU15	4
EU154	3
EU16	3
EU165	3
EU179	3
EU184	3
EU54	3
EU56	2
EU73	2
EU89	2
EU99	2
pssp	516
EC1	3
EC10	2
EC108	2
EC115	4
EC116	4
EC117	2
EC12	7
EC127	2
EC139	3
EC142	4
EC143	3
EC144	4
EC145	4
EC146	4
EC147	4
EC148	3
EC151	4
EC153	4
EC156	4
EC157	8
EC158	5
EC160	2
EC162	2
EC163	2
EC168	2
EC17	5
EC170	4
EC171	2
EC172	4
EC173	2
EC174	2
EC175	4
EC176	3
EC177	4
EC178	3
EC179	2
EC180	4
EC181	4
EC182	4
EC183	3
EC185	5
EC186	8
EC188	8
EC189	3
EC190	2
EC191	2
EC192	2
EC195	2
EC196	4
EC197	2
EC199	3
EC2	3
EC21	6
EC30	2
EC43	8
EC46	2
EC47	4
EC48	3
EC52	4
EC57	2
EC58	2
EC63	2
EC65	6
EC67	5
EC75	4
EC76	3
EC77	4
EC84	7
EC94	5
EC98	5
EC99	3
EU10	8
EU103	3
EU104	4
EU106	2
EU107	4
EU109	4
EU111	2
EU112	3
EU114	2
EU115	2
EU119	2
EU124	2
EU126	3
EU129	3
EU130	8
EU131	2
EU132	2
EU133	8
EU134	3
EU14	2
EU140	2
EU145	4
EU147	3
EU150	5
EU153	7
EU156	8
EU157	5
EU169	6
EU17	4
EU172	4
EU173	4
EU176	2
EU181	3
EU182	4
EU183	3
EU186	3
EU187	4
EU188	2
EU189	2
EU19	3
EU194	6
EU195	2
EU196	4
EU197	2
EU199	2
EU20	2
EU22	2
EU25	2
EU26	2
EU3	4
EU32	2
EU34	2
EU38	4
EU40	2
EU41	2
EU42	2
EU43	5
EU44	2
EU46	3
EU47	4
EU52	5
EU57	2
EU6	3
EU63	2
EU64	3
EU65	7
EU67	2
EU68	2
EU69	2
EU70	2
EU74	2
EU75	3
EU76	4
EU79	3
EU80	2
EU86	2
EU87	2
EU94	2
EU96	2
EU98	2
unk	53
EC123	2
EC128	2
EC137	3
EC155	3
EC161	2
EC187	8
EC24	2
EC31	2
EC32	2
EC34	2
EC35	4
EC6	4
EC71	2
EU166	3
EU178	7
EU190	5
Grand Total	1321

## Sheet: Sheet1
Antillogorgia data from Lasker & Porto Hannes 2021
		Colonies per m2													survival				30 d survival
Site	Year	1 month	7 months	13 months	Survival	Survival		Daily Mortality								Time (days)
					(Month 1-7)	(Month 7-13)		first 6 months									daily mortality
Burrows	2009	3.4	1	0.4	0.294	0.4		-0.00672624				Wells et al	P homomalla	tiles	0.35	52	-0.0201889		0.545711	0.2978	0.0253652
Burrows	2010	3.4	1	0	0.294	0		-0.00672624				lasker,kim coffroth	P kuna	tiles	0.121065	20	-0.105571		0.042124	0.00177443	4.52357e-09
Burrows	2011	4.754	0.833	0.8	0.175	0.96		-0.00957675				Evans, Coffroth, Lasker	Briareum	tiles	0.087	14	-0.174418		0.00534	2.85156e-05	1.63588e-14
Burrows	2012	11.789	2	nd	0.17	nd		-0.00973603
Gorda Patch	2009	6.6	1.4	1	0.212	0.714		-0.00852291				Martinez Quintana & Lasker	P homomalla	tiles	0.85	20	-0.00812595		0.783661	0.614125	0.227883
Gorda Patch	2010	6.421	3.579	0.2	0.557	0.056		-0.00321533							0.127049	59	-0.0349692		0.350262	0.122683	0.00172179
Gorda Patch	2011	1.855	0.2	0.8	0.108	nd		-0.0122287
Gorda Patch	2012	2.65	2.4	nd	0.906	nd		-0.000542395				Lasker & Porto Hannes	Antillogorgia spp	natural		max	-0.0227207		0.505797	0.25583	0.016
Sandy Point	2009	2.176	0.4	0	0.184	nd		-0.00930121					months 1 to 7			min	-0.000542395		0.98386	0.96798	0.906
Sandy Point	2010	1.4	0.4	0	0.286	0		-0.00687782								median	-0.00940776		0.754098	0.568664	0.180466
Sandy Point	2011	3.2	0.6	0	0.188	0		-0.00918304								average	-0.00995627		0.741791	0.550253	0.16332
Sandy Point	2012	1.371	0.4	nd	0.292	nd		-0.00676374								CHR average	-0.00945397		0.753053	0.567089	0.178955
Cross Harbour Patch	2009	19.253	0.6	1.2	0.031	2		-0.0190866
Cross Harbour Patch	2010	8	0.4	0.4	0.05	1		-0.0164601
Cross Harbour Patch	2011	9.978	0.6	0.2	0.06	0.333		-0.0154583
Cross Harbour Patch	2012	24.4	0.4	nd	0.016	nd		-0.0227207
Cross Harbour Slope	2009	28.6	5.053	0.6	0.177	0.119		-0.00951432
Cross Harbour Slope	2010	12.4	3.6	0.2	0.29	0.056		-0.00680151
Cross Harbour Slope	2011	30.2	6.4	0.8	0.212	0.125		-0.00852291
Cross Harbour Slope	2012	72.6	6.6	nd	0.091	nd		-0.0131698
Cross Harbour Ridge	2009	227.4	36.6	6	0.161	0.164		-0.0100349
Cross Harbour Ridge	2010	161.733	65	7	0.402	0.108		-0.00500716
Cross Harbour Ridge	2011	230.958	32	4.8	0.139	0.15		-0.0108422
Cross Harbour Ridge	2012	226.284	25.8	nd	0.114	nd		-0.0119316

## Sheet: by interval
																												WEIGHTED AVERAGE 6 MONTH SURVIVAL
																												0.500261	0.459135	0.57603	0.634243
Count of size class change	Column Labels									Count of size class change	Column Labels											transition for each interval
Row Labels										Row Labels	1	2	3	4	5	NA	#N/A	Grand Total				transition for each interval
										3	3	10	10	15	1	1	1	41				1	2	3	4	5
										0		4	2	3		1		10		Size Class	1	0.333333	0.2	0.1	0.0666667	0
										1	1	2	1	1				5		<0.6 cm	2	0.333333	0.2	0.1	0	0
										2	1	2	1					4		"0.6 -1.1 cm	3	0.333333	0.2	0.2	0.0666667	0
										3	1	2	2	1				6		1.1 -2.0 cm	4	0	0	0.4	0.666667	0
										4			4	10			1	15		2.1 – 5.0 cm	5	0	0	0	0	0
										5					1			1		survival		1	0.6	0.8	0.8	0		1	0.36	0.64	0.64		3	3.6	6.4	9.6
										4	13	51	27	40	4	2	1	138		Size Class	1	0.307692	0.0784314	0	0.025	0.25
										0	5	15	9	10				39		<0.6 cm	2	0.0769231	0.333333	0.037037	0.05	0
										1	4	4		1	1			10		"0.6 -1.1 cm	3	0	0	0.518519	0.05	0
										2	1	17	1	2				21		1.1 -2.0 cm	4	0	0.0196078	0.0740741	0.3	0.25
										3			14	2				16		2.1 – 5.0 cm	5	0	0	0	0.05	0.5
										4		1	2	12	1			16		survival		0.384615	0.431373	0.62963	0.475	1		0.238528	0.283321	0.499606	0.327371		3.10087	14.4494	13.4894	13.0948
										5				2	2		1	5
										NA	3	14	1	11		2		31
										5	36	85	52	79	6	5	5	268		Size Class	1	0.222222	0.0235294	0.0192308	0.0253165	0.166667
										0	14	35	14	15	2			80		<0.6 cm	2	0.194444	0.317647	0.192308	0.0632911	0
										1	8	2	1	2	1			14		"0.6 -1.1 cm	3	0.111111	0.117647	0.269231	0.0379747	0
										2	7	27	10	5				49		1.1 -2.0 cm	4	0.0277778	0.0588235	0.115385	0.506329	0.166667
										3	4	10	14	3				31		2.1 – 5.0 cm	5	0	0	0	0.0759494	0.166667
										4	1	5	6	40	1		1	54		survival		0.555556	0.517647	0.596154	0.708861	0.5		0.493939	0.453775	0.537564	0.661718		17.7818	38.5709	27.9533	52.2757
										5				6	1		4	11
										NA	2	6	7	8	1	5		29
									#REF!	6	110	109	96	57		28		400		Size Class	1	0.19802	0.0543478	0.0114943	0.0192308	0
										0	51	46	41	18				156		<0.6 cm	2	0.207921	0.23913	0.126437	0.0769231	0
									0	1	20	5	1	1				27		"0.6 -1.1 cm	3	0.049505	0.108696	0.16092	0.0384615	0
										2	21	22	11	4				58		1.1 -2.0 cm	4	0.039604	0.0978261	0.229885	0.442308	0
										3	5	10	14	2				31		2.1 – 5.0 cm	5	0	0	0	0.0769231	0
										4	4	9	20	23				56		survival		0.49505	0.5	0.528736	0.653846	1							54.4554	54.5	50.7586	37.2692
										5				4				4										0.49505	0.5	0.528736	0.653846
										NA	9	17	9	5		28		68
										8	7	4	8	14	1	3		37		Size Class	1	0.142857	0	0	0	#DIV/0!
										0	4	1	4	1				10		<0.6 cm	2	0.285714	0.5	0	0.142857	#DIV/0!
										1	1							1		"0.6 -1.1 cm	3	0	0.25	0.375	0.142857	#DIV/0!
										2	2	2		2				6		1.1 -2.0 cm	4	0	0	0.125	0.571429	#DIV/0!
										3		1	3	2				6		2.1 – 5.0 cm	5	0	0	0	0.0714286	#DIV/0!
										4			1	8				9		survival		0.428571	0.75	0.5	0.928571	#DIV/0!		0.529685	0.805927	0.594604	0.945935		3.70779	3.22371	4.75683	13.2431
										5				1	1			2
										NA						3		3
										11	6	11	13	2				32
										1	1	2						3		<0.6 cm	2	0.166667	0.181818	0	0
										2	2	6	8	1				17		"0.6 -1.1 cm	3	0.333333	0.545455	0.615385	0.5
										3	2	2	3					7		1.1 -2.0 cm	4	0.333333	0.181818	0.230769	0
										4	1	1	2	1				5		2.1 – 5.0 cm	5	0.166667	0.0909091	0.153846	0.5
										13				3				3		survival		1	1	1	1			1	1	1	1		6	11	13	2
										3				2				2
										4				1				1
										17					1			1
										3					1			1
										23			1					1
										4			1					1
										NA				1		399		400
										1						116		116
										2						116		116
										3				1		108		109
										4						59		59
										Grand Total	175	270	207	211	13	438	7	1321
																						0.215509	0.0575021	0.0153625	0.0237159
																						0.205671	0.30153	0.152314	0.0776817
																						0.0768855	0.119687	0.320141	0.0640624
																						0.0372387	0.0796107	0.191833	0.465032
																									0.071909
																						0.535304	0.558329	0.679651	0.702401

## Sheet: metadata
Site: Grootpan Bay (18° 18.360’N, 64° 43.140’W) and Europa Bay (18° 19.016’N, 64° 43.798’W)
rec.id: Identifier number of the mapped recruit
Genus: esp=Eunicea; pssp= Pseudplexaura
status: status of the mapped recruit as alive, missing (not observed but present in a subsequent census), or dead (not observed for 2 censuses)
month: Month at the time of the measurement. Month 0= August 2016
height: Recruit height (cm) measured in month m
previous_height: Height at the previous measurement
previous_sizeclass: Size class at the time of the previous measurement	size classes are: 1 polyp; <0 6; 0.6-1.1; 1.2-2; 2- 5; >5
growth: Change in height betwee the two measurements = height - previous_height
interval: time in months between the two measurements
growth rate : growth/interval
event2: growth when growth rate > 0; no-growth when growth rate =0; shrink when growth rate <0
partial_mort_int: "yes" when a recruit suffered partial mortality and in the next intervals. "no" before partial mortality or never partial mortality
partial_mort_rec : "yes" when a recruit suffered partial mortality at least once . "no" recruits that never suffered partial mortility

## Sheet: growth
site	rec.id	genus	status	month	height	Size Class	previous_height	Previous Size Class	prev_sizeclass	size class change	growth	interval (months)	growth_rate	ln_growth_rate	event2	partial_mort_int	partial_mort_rec
Grootpan	EC1	pssp	Alive	0	2	3	NA	NA	NA	nd	NA	NA	NA	NA	NA	no	yes
Grootpan	EC1	pssp	Alive	6	1.7	3	2	3	1.2-2	0	-0.3	6	-0.3	2.27213	shrink	yes	yes
Grootpan	EC1	pssp	Dead	11	NA	0	1.7	3	1.2-2	nd	NA	5	NA	NA	NA	yes	yes
Grootpan	EC10	pssp	Alive	0	1.2	3	NA	NA	NA	nd	NA	NA	NA	NA	NA	no	no
Grootpan	EC10	pssp	Dead	6	NA	0	1.2	3	1.2-2	nd	NA	6	NA	NA	NA	no	no
Grootpan	EC100	esp	Alive	0	1.4	3	NA	NA	NA	nd	NA	NA	NA	NA	NA	no	yes
Grootpan	EC100	esp	missing	6	NA	NA	NA	NA	NA	nd	NA	6	NA	NA	NA	no	yes
Grootpan	EC100	esp	Alive	11	0.8	2	1.4	3	1.2-2	-1	-0.6	11	-0.327273	2.26931	shrink	yes	yes
Grootpan	EC100	esp	Dead	15	NA	0	0.8	2	0.6-1.1	nd	NA	4	NA	NA	NA	yes	yes
Grootpan	EC101	esp	Alive	0	0.3	1	NA	NA	NA	nd	NA	NA	NA	NA	NA	no	no
Grootpan	EC101	esp	Dead	6	NA	0	0.3	1	< 0.6	nd	NA	6	NA	NA	NA	no	no
Grootpan	EC102	esp	Alive	0	0.3	1	NA	NA	NA	nd	NA	NA	NA	NA	NA	no	no
Grootpan	EC102	esp	Dead	6	NA	0	0.3	1	< 0.6	nd	NA	6	NA	NA	NA	no	no
Grootpan	EC103	esp	Alive	0	0.6	2	NA	NA	NA	nd	NA	NA	NA	NA	NA	no	no
Grootpan	EC103	esp	Dead	6	NA	0	0.6	2	0.6-1.1	nd	NA	6	NA	NA	NA	no	no
Grootpan	EC104	esp	Alive	0	1.1	2	NA	NA	NA	nd	NA	NA	NA	NA	NA	no	no
Grootpan	EC104	esp	Dead	6	NA	0	1.1	2	0.6-1.1	nd	NA	6	NA	NA	NA	no	no
Grootpan	EC105	esp	Alive	0	1.3	3	NA	NA	NA	nd	NA	NA	NA	NA	NA	no	yes
Grootpan	EC105	esp	Alive	6	0.6	2	1.3	3	1.2-2	-1	-0.7	6	-0.7	2.23001	shrink	yes	yes
Grootpan	EC105	esp	Dead	11	NA	0	0.6	2	0.6-1.1	nd	NA	5	NA	NA	NA	yes	yes
Grootpan	EC106	esp	Alive	0	1.1	2	NA	NA	NA	nd	NA	NA	NA	NA	NA	no	yes
Grootpan	EC106	esp	Alive	6	0.5	1	1.1	2	0.6-1.1	-1	-0.6	6	-0.6	2.24071	shrink	yes	yes
Grootpan	EC106	esp	Alive	11	1.7	3	0.5	1	< 0.6	2	1.2	5	1.44	2.43712	growth	yes	yes
Grootpan	EC106	esp	Alive	15	1.7	3	1.7	3	1.2-2	0	0	4	0	2.30259	no-growth	yes	yes
Grootpan	EC106	esp	Dead	20	NA	0	1.7	3	1.2-2	nd	NA	5	NA	NA	NA	yes	yes
Grootpan	EC108	pssp	Alive	0	0.5	1	NA	NA	NA	nd	NA	NA	NA	NA	NA	no	no
Grootpan	EC108	pssp	Dead	6	NA	0	0.5	1	< 0.6	nd	NA	6	NA	NA	NA	no	no
Grootpan	EC109	esp	Alive	0	0.3	1	NA	NA	NA	nd	NA	NA	NA	NA	NA	no	no
Grootpan	EC109	esp	Dead	6	NA	0	0.3	1	< 0.6	nd	NA	6	NA	NA	NA	no	no
Grootpan	EC11	esp	Alive	0	1.7	3	NA	NA	NA	nd	NA	NA	NA	NA	NA	no	no
Grootpan	EC11	esp	Dead	6	NA	0	1.7	3	1.2-2	nd	NA	6	NA	NA	NA	no	no
Grootpan	EC111	esp	Alive	0	0.3	1	NA	NA	NA	nd	NA	NA	NA	NA	NA	no	no
Grootpan	EC111	esp	Dead	6	NA	0	0.3	1	< 0.6	nd	NA	6	NA	NA	NA	no	no
Grootpan	EC112	esp	Alive	0	0.8	2	NA	NA	NA	nd	NA	NA	NA	NA	NA	no	yes
Grootpan	EC112	esp	Alive	6	0.6	2	0.8	2	0.6-1.1	0	-0.2	6	-0.2	2.28238	shrink	yes	yes
Grootpan	EC112	esp	Alive	11	0.6	2	0.6	2	0.6-1.1	0	0	5	0	2.30259	no-growth	yes	yes
Grootpan	EC112	esp	Dead	15	NA	0	0.6	2	0.6-1.1	nd	NA	4	NA	NA	NA	yes	yes
Grootpan	EC113	esp	Alive	0	0.8	2	NA	NA	NA	nd	NA	NA	NA	NA	NA	no	yes
Grootpan	EC113	esp	Alive	6	0.4	1	0.8	2	0.6-1.1	-1	-0.4	6	-0.4	2.26176	shrink	yes	yes
Grootpan	EC113	esp	Alive	11	0.5	1	0.4	1	< 0.6	0	0.1	5	0.12	2.31451	growth	yes	yes
Grootpan	EC113	esp	Alive	15	0.5	1	0.5	1	< 0.6	0	0	4	0	2.30259	no-growth	yes	yes
Grootpan	EC113	esp	Alive	20	0.7	2	0.5	1	< 0.6	1	0.2	5	0.24	2.3263	growth	yes	yes
Grootpan	EC113	esp	Alive	23	0.7	2	0.7	2	0.6-1.1	0	0	3	0	2.30259	no-growth	yes	yes
Grootpan	EC113	esp	Alive	31	0.7	2	0.7	2	0.6-1.1	0	0	8	0	2.30259	no-growth	yes	yes
Grootpan	EC113	esp	Alive	36	0.7	2	0.7	2	0.6-1.1	0	0	5	0	2.30259	no-growth	yes	yes
Grootpan	EC114	esp	Alive	0	0.5	1	NA	NA	NA	nd	NA	NA	NA	NA	NA	no	yes
Grootpan	EC114	esp	Alive	6	0.4	1	0.5	1	< 0.6	0	-0.1	6	-0.1	2.29253	shrink	yes	yes
Grootpan	EC114	esp	Dead	11	NA	0	0.4	1	< 0.6	nd	NA	5	NA	NA	NA	yes	yes
Grootpan	EC115	pssp	Alive	0	0.3	1	NA	NA	NA	nd	NA	NA	NA	NA	NA	no	no
Grootpan	EC115	pssp	Alive	6	0.3	1	0.3	1	< 0.6	0	0	6	0	2.30259	no-growth	no	no
Grootpan	EC115	pssp	Alive	11	0.7	2	0.3	1	< 0.6	1	0.4	5	0.48	2.34947	growth	no	no
Grootpan	EC115	pssp	Dead	15	NA	0	0.7	2	0.6-1.1	nd	NA	4	NA	NA	NA	no	no
Grootpan	EC116	pssp	Alive	0	2.6	4	NA	NA	NA	nd	NA	NA	NA	NA	NA	no	yes
Grootpan	EC116	pssp	Alive	6	4.3	4	2.6	4	2.1-5	0	1.7	6	1.7	2.45959	growth	no	yes
Grootpan	EC116	pssp	Alive	11	3.1	4	4.3	4	2.1-5	0	-1.2	5	-1.44	2.1471	shrink	yes	yes
Grootpan	EC116	pssp	Dead	15	NA	0	3.1	4	2.1-5	nd	NA	4	NA	NA	NA	yes	yes
Grootpan	EC117	pssp	Alive	0	1.4	3	NA	NA	NA	nd	NA	NA	NA	NA	NA	no	no
Grootpan	EC117	pssp	Dead	6	NA	0	1.4	3	1.2-2	nd	NA	6	NA	NA	NA	no	no
Grootpan	EC118	esp	Alive	0	0.6	2	NA	NA	NA	nd	NA	NA	NA	NA	NA	no	no
Grootpan	EC118	esp	Dead	6	NA	0	0.6	2	0.6-1.1	nd	NA	6	NA	NA	NA	no	no
Grootpan	EC119	esp	Alive	0	0.6	2	NA	NA	NA	nd	NA	NA	NA	NA	NA	no	no
Grootpan	EC119	esp	Dead	6	NA	0	0.6	2	0.6-1.1	nd	NA	6	NA	NA	NA	no	no
Grootpan	EC12	pssp	Alive	0	2.7	4	NA	NA	NA	nd	NA	NA	NA	NA	NA	no	no
Grootpan	EC12	pssp	Alive	6	5.7	5	2.7	4	2.1-5	1	3	6	3	2.56495	growth	no	no
Grootpan	EC12	pssp	missing	11	NA	NA	5.7	5	> 5	nd	NA	5	NA	NA	NA	no	no
Grootpan	EC12	pssp	missing	15	NA	NA	NA	NA	NA	nd	NA	4	NA	NA	NA	no	no
Grootpan	EC12	pssp	missing	20	NA	NA	NA	NA	NA	nd	NA	5	NA	NA	NA	no	no
Grootpan	EC12	pssp	Alive	23	1.2	3	5.7	5	> 5	-2	-4.5	17	-1.58824	2.12963	shrink	yes	no
Grootpan	EC12	pssp	Dead	31	NA	0	1.2	3	1.2-2	nd	NA	8	NA	NA	NA	yes	no
Grootpan	EC120	esp	Alive	0	0.3	1	NA	NA	NA	nd	NA	NA	NA	NA	NA	no	no
Grootpan	EC120	esp	Dead	6	NA	0	0.3	1	< 0.6	nd	NA	6	NA	NA	NA	no	no
Grootpan	EC121	esp	Alive	0	0.3	1	NA	NA	NA	nd	NA	NA	NA	NA	NA	no	no
Grootpan	EC121	esp	Dead	6	NA	0	0.3	1	< 0.6	nd	NA	6	NA	NA	NA	no	no
Grootpan	EC122	esp	Alive	0	0.7	2	NA	NA	NA	nd	NA	NA	NA	NA	NA	no	no
Grootpan	EC122	esp	Dead	6	NA	0	0.7	2	0.6-1.1	nd	NA	6	NA	NA	NA	no	no
Grootpan	EC124	esp	Alive	0	0.3	1	NA	NA	NA	nd	NA	NA	NA	NA	NA	no	no
Grootpan	EC124	esp	Dead	6	NA	0	0.3	1	< 0.6	nd	NA	6	NA	NA	NA	no	no
Grootpan	EC125	esp	Alive	0	0.7	2	NA	NA	NA	nd	NA	NA	NA	NA	NA	no	yes
Grootpan	EC125	esp	Alive	6	1.1	2	0.7	2	0.6-1.1	0	0.4	6	0.4	2.34181	growth	no	yes
Grootpan	EC125	esp	Alive	11	0.9	2	1.1	2	0.6-1.1	0	-0.2	5	-0.24	2.27829	shrink	yes	yes
Grootpan	EC125	esp	Alive	15	2	3	0.9	2	0.6-1.1	1	1.1	4	1.65	2.45531	growth	yes	yes
Grootpan	EC125	esp	Dead	20	NA	0	2	3	1.2-2	nd	NA	5	NA	NA	NA	yes	yes
Grootpan	EC126	esp	Alive	0	0.7	2	NA	NA	NA	nd	NA	NA	NA	NA	NA	no	yes
Grootpan	EC126	esp	Alive	6	1	2	0.7	2	0.6-1.1	0	0.3	6	0.3	2.33214	growth	no	yes
Grootpan	EC126	esp	Alive	11	0.7	2	1	2	0.6-1.1	0	-0.3	5	-0.36	2.26592	shrink	yes	yes
Grootpan	EC126	esp	Dead	15	NA	0	0.7	2	0.6-1.1	nd	NA	4	NA	NA	NA	yes	yes
Grootpan	EC127	pssp	Alive	0	0.7	2	NA	NA	NA	nd	NA	NA	NA	NA	NA	no	no
Grootpan	EC127	pssp	missing	6	NA	NA	0.7	2	0.6-1.1	nd	NA	6	NA	NA	NA	no	no
Grootpan	EC129	esp	Alive	0	0.8	2	NA	NA	NA	nd	NA	NA	NA	NA	NA	no	no
Grootpan	EC129	esp	missing	6	NA	NA	0.8	2	0.6-1.1	nd	NA	6	NA	NA	NA	no	no
Grootpan	EC130	esp	Alive	0	0.3	1	NA	NA	NA	nd	NA	NA	NA	NA	NA	no	no
Grootpan	EC130	esp	missing	6	NA	NA	0.3	1	< 0.6	nd	NA	6	NA	NA	NA	no	no
Grootpan	EC131	esp	Alive	0	0.3	1	NA	NA	NA	nd	NA	NA	NA	NA	NA	no	no
Grootpan	EC131	esp	missing	6	NA	NA	0.3	1	< 0.6	nd	NA	6	NA	NA	NA	no	no
Grootpan	EC132	esp	Alive	0	0.3	1	NA	NA	NA	nd	NA	NA	NA	NA	NA	no	no
Grootpan	EC132	esp	missing	6	NA	NA	0.3	1	< 0.6	nd	NA	6	NA	NA	NA	no	no
Grootpan	EC133	esp	Alive	0	0.8	2	NA	NA	NA	nd	NA	NA	NA	NA	NA	no	yes
Grootpan	EC133	esp	Alive	6	0.7	2	0.8	2	0.6-1.1	0	-0.1	6	-0.1	2.29253	shrink	yes	yes
Grootpan	EC133	esp	Dead	11	NA	0	0.7	2	0.6-1.1	nd	NA	5	NA	NA	NA	yes	yes
Grootpan	EC134	esp	Alive	0	0.7	2	NA	NA	NA	nd	NA	NA	NA	NA	NA	no	no
Grootpan	EC134	esp	Alive	6	0.7	2	0.7	2	0.6-1.1	0	0	6	0	2.30259	no-growth	no	no
Grootpan	EC134	esp	Dead	11	NA	0	0.7	2	0.6-1.1	nd	NA	5	NA	NA	NA	no	no
Grootpan	EC135	esp	Alive	0	0.7	2	NA	NA	NA	nd	NA	NA	NA	NA	NA	no	no
Grootpan	EC135	esp	Alive	6	0.7	2	0.7	2	0.6-1.1	0	0	6	0	2.30259	no-growth	no	no
Grootpan	EC135	esp	Dead	11	NA	0	0.7	2	0.6-1.1	nd	NA	5	NA	NA	NA	no	no
Grootpan	EC136	esp	Alive	0	0.3	1	NA	NA	NA	nd	NA	NA	NA	NA	NA	no	no
Grootpan	EC136	esp	Alive	6	0.3	1	0.3	1	< 0.6	0	0	6	0	2.30259	no-growth	no	no
Grootpan	EC136	esp	Alive	11	0.3	1	0.3	1	< 0.6	0	0	5	0	2.30259	no-growth	no	no
Grootpan	EC136	esp	missing	15	NA	NA	0.3	1	< 0.6	nd	NA	4	NA	NA	NA	no	no
Grootpan	EC138	esp	Alive	0	0.7	2	NA	NA	NA	nd	NA	NA	NA	NA	NA	no	no
Grootpan	EC138	esp	Dead	6	NA	0	0.7	2	0.6-1.1	nd	NA	6	NA	NA	NA	no	no
Grootpan	EC139	pssp	Alive	0	0.3	1	NA	NA	NA	nd	NA	NA	NA	NA	NA	no	no
Grootpan	EC139	pssp	Alive	6	0.3	1	0.3	1	< 0.6	0	0	6	0	2.30259	no-growth	no	no
Grootpan	EC139	pssp	Dead	11	NA	0	0.3	1	< 0.6	nd	NA	5	NA	NA	NA	no	no
Grootpan	EC14	esp	Alive	0	1.4	3	NA	NA	NA	nd	NA	NA	NA	NA	NA	no	no
Grootpan	EC14	esp	Dead	6	NA	0	1.4	3	1.2-2	nd	NA	6	NA	NA	NA	no	no
Grootpan	EC140	esp	Alive	0	1	2	NA	NA	NA	nd	NA	NA	NA	NA	NA	no	yes
Grootpan	EC140	esp	missing	6	NA	NA	NA	NA	NA	nd	NA	6	NA	NA	NA	no	yes
Grootpan	EC140	esp	Alive	11	0.8	2	1	2	0.6-1.1	0	-0.2	11	-0.109091	2.29162	shrink	yes	yes
Grootpan	EC140	esp	missing	15	NA	NA	0.8	2	0.6-1.1	nd	NA	4	NA	NA	NA	yes	yes
Grootpan	EC141	esp	Alive	0	2.5	4	NA	NA	NA	nd	NA	NA	NA	NA	NA	no	yes
Grootpan	EC141	esp	missing	6	NA	NA	NA	NA	NA	nd	NA	6	NA	NA	NA	no	yes
Grootpan	EC141	esp	Alive	11	0.6	2	2.5	4	2.1-5	-2	-1.9	11	-1.03636	2.19318	shrink	yes	yes
Grootpan	EC141	esp	missing	15	NA	NA	0.6	2	0.6-1.1	nd	NA	4	NA	NA	NA	yes	yes
Grootpan	EC142	pssp	Alive	0	1.8	3	NA	NA	NA	nd	NA	NA	NA	NA	NA	no	yes
Grootpan	EC142	pssp	Alive	6	2.1	4	1.8	3	1.2-2	1	0.3	6	0.3	2.33214	growth	no	yes
Grootpan	EC142	pssp	Alive	11	1.1	2	2.1	4	2.1-5	-2	-1	5	-1.2	2.17475	shrink	yes	yes
Grootpan	EC142	pssp	missing	15	NA	NA	1.1	2	0.6-1.1	nd	NA	4	NA	NA	NA	yes	yes
Grootpan	EC143	pssp	Alive	0	0.5	1	NA	NA	NA	nd	NA	NA	NA	NA	NA	no	yes
Grootpan	EC143	pssp	Alive	6	0.3	1	0.5	1	< 0.6	0	-0.2	6	-0.2	2.28238	shrink	yes	yes
Grootpan	EC143	pssp	Dead	11	NA	0	0.3	1	< 0.6	nd	NA	5	NA	NA	NA	yes	yes
Grootpan	EC144	pssp	Alive	0	0.8	2	NA	NA	NA	nd	NA	NA	NA	NA	NA	no	no
Grootpan	EC144	pssp	missing	6	NA	NA	0.8	2	0.6-1.1	nd	NA	6	NA	NA	NA	no	no
Grootpan	EC144	pssp	Alive	11	0.8	2	0.8	2	0.6-1.1	0	0	11	0	2.30259	no-growth	no	no
Grootpan	EC144	pssp	missing	15	NA	NA	0.8	2	0.6-1.1	nd	NA	4	NA	NA	NA	no	no
Grootpan	EC145	pssp	Alive	0	1	2	NA	NA	NA	nd	NA	NA	NA	NA	NA	no	no
Grootpan	EC145	pssp	Alive	6	2.2	4	1	2	0.6-1.1	2	1.2	6	1.2	2.41591	growth	no	no
Grootpan	EC145	pssp	Alive	11	3.6	4	2.2	4	2.1-5	0	1.4	5	1.68	2.45788	growth	no	no
Grootpan	EC145	pssp	missing	15	NA	NA	3.6	4	2.1-5	nd	NA	4	NA	NA	NA	no	no
Grootpan	EC146	pssp	Alive	0	0.5	1	NA	NA	NA	nd	NA	NA	NA	NA	NA	no	yes
Grootpan	EC146	pssp	Alive	6	1.2	3	0.5	1	< 0.6	2	0.7	6	0.7	2.37024	growth	no	yes
Grootpan	EC146	pssp	Alive	11	0.7	2	1.2	3	1.2-2	-1	-0.5	5	-0.6	2.24071	shrink	yes	yes
Grootpan	EC146	pssp	missing	15	NA	NA	0.7	2	0.6-1.1	nd	NA	4	NA	NA	NA	yes	yes
Grootpan	EC147	pssp	Alive	0	0.5	1	NA	NA	NA	nd	NA	NA	NA	NA	NA	no	no
Grootpan	EC147	pssp	Alive	6	0.6	2	0.5	1	< 0.6	1	0.1	6	0.1	2.31254	growth	no	no
Grootpan	EC147	pssp	Alive	11	0.6	2	0.6	2	0.6-1.1	0	0	5	0	2.30259	no-growth	no	no
Grootpan	EC147	pssp	missing	15	NA	NA	0.6	2	0.6-1.1	nd	NA	4	NA	NA	NA	no	no
Grootpan	EC148	pssp	Alive	0	1	2	NA	NA	NA	nd	NA	NA	NA	NA	NA	no	no
Grootpan	EC148	pssp	Alive	6	1.7	3	1	2	0.6-1.1	1	0.7	6	0.7	2.37024	growth	no	no
Grootpan	EC148	pssp	Dead	11	NA	0	1.7	3	1.2-2	nd	NA	5	NA	NA	NA	no	no
Grootpan	EC149	esp	Alive	0	1	2	NA	NA	NA	nd	NA	NA	NA	NA	NA	no	yes
Grootpan	EC149	esp	missing	6	NA	NA	1	2	0.6-1.1	nd	NA	6	NA	NA	NA	no	yes
Grootpan	EC149	esp	Alive	11	0.5	1	1	2	0.6-1.1	-1	-0.5	11	-0.272727	2.27493	shrink	yes	yes
Grootpan	EC149	esp	missing	15	NA	NA	0.5	1	< 0.6	nd	NA	4	NA	NA	NA	yes	yes
Grootpan	EC15	esp	Alive	0	0.9	2	NA	NA	NA	nd	NA	NA	NA	NA	NA	no	no
Grootpan	EC15	esp	missing	6	NA	NA	0.9	2	0.6-1.1	nd	NA	6	NA	NA	NA	no	no
Grootpan	EC15	esp	Alive	11	0.9	2	0.9	2	0.6-1.1	0	0	11	0	2.30259	no-growth	no	no
Grootpan	EC15	esp	Dead	15	NA	0	0.9	2	0.6-1.1	nd	NA	4	NA	NA	NA	no	no
Grootpan	EC150	esp	Alive	0	0.5	1	NA	NA	NA	nd	NA	NA	NA	NA	NA	no	no
Grootpan	EC150	esp	Dead	6	NA	0	0.5	1	< 0.6	nd	NA	6	NA	NA	NA	no	no
Grootpan	EC151	pssp	Alive	0	1.2	3	NA	NA	NA	nd	NA	NA	NA	NA	NA	no	no
Grootpan	EC151	pssp	Alive	6	2.1	4	1.2	3	1.2-2	1	0.9	6	0.9	2.38876	growth	no	no
Grootpan	EC151	pssp	Alive	11	2.4	4	2.1	4	2.1-5	0	0.3	5	0.36	2.33795	growth	no	no
Grootpan	EC151	pssp	missing	15	NA	NA	2.4	4	2.1-5	nd	NA	4	NA	NA	NA	no	no
Grootpan	EC152	esp	Alive	0	0.3	1	NA	NA	NA	nd	NA	NA	NA	NA	NA	no	no
Grootpan	EC152	esp	Dead	6	NA	0	0.3	1	< 0.6	nd	NA	6	NA	NA	NA	no	no
Grootpan	EC153	pssp	Alive	0	0.5	1	NA	NA	NA	nd	NA	NA	NA	NA	NA	no	no
Grootpan	EC153	pssp	Alive	6	0.6	2	0.5	1	< 0.6	1	0.1	6	0.1	2.31254	growth	no	no
Grootpan	EC153	pssp	Alive	11	0.9	2	0.6	2	0.6-1.1	0	0.3	5	0.36	2.33795	growth	no	no
Grootpan	EC153	pssp	missing	15	NA	NA	0.9	2	0.6-1.1	nd	NA	4	NA	NA	NA	no	no
Grootpan	EC154	esp	Alive	0	0.3	1	NA	NA	NA	nd	NA	NA	NA	NA	NA	no	no
Grootpan	EC154	esp	missing	6	NA	NA	NA	NA	NA	nd	NA	6	NA	NA	NA	no	no
Grootpan	EC154	esp	Alive	11	0.6	2	0.3	1	< 0.6	1	0.3	11	0.163636	2.31882	growth	no	no
Grootpan	EC154	esp	missing	15	NA	NA	0.6	2	0.6-1.1	nd	NA	4	NA	NA	NA	no	no
Grootpan	EC156	pssp	Alive	0	0.3	1	NA	NA	NA	nd	NA	NA	NA	NA	NA	no	no
Grootpan	EC156	pssp	Alive	6	0.3	1	0.3	1	< 0.6	0	0	6	0	2.30259	no-growth	no	no
Grootpan	EC156	pssp	Alive	11	0.3	1	0.3	1	< 0.6	0	0	5	0	2.30259	no-growth	no	no
Grootpan	EC156	pssp	Dead	15	NA	0	0.3	1	< 0.6	nd	NA	4	NA	NA	NA	no	no
Grootpan	EC157	pssp	Alive	0	1.8	3	NA	NA	NA	nd	NA	NA	NA	NA	NA	no	no
Grootpan	EC157	pssp	Alive	6	3	4	1.8	3	1.2-2	1	1.2	6	1.2	2.41591	growth	no	no
Grootpan	EC157	pssp	Alive	11	5.2	5	3	4	2.1-5	1	2.2	5	2.64	2.53687	growth	no	no
Grootpan	EC157	pssp	Alive	15	5.2	5	5.2	5	> 5	0	0	4	0	2.30259	no-growth	no	no
Grootpan	EC157	pssp	Alive	20	5.2	5	5.2	5	> 5	0	0	5	0	2.30259	no-growth	no	no
Grootpan	EC157	pssp	Alive	23	5.6	5	5.2	5	> 5	0	0.4	3	0.8	2.37955	growth	no	no
Grootpan	EC157	pssp	Alive	31	9.2	5	5.6	5	> 5	0	3.6	8	2.7	2.5416	growth	no	no
Grootpan	EC157	pssp	Alive	36	18	5	9.2	#N/A	> 5	#N/A	8.8	5	10.56	3.02335	growth	no	no
Grootpan	EC158	pssp	Alive	0	1.5	3	NA	NA	NA	nd	NA	NA	NA	NA	NA	no	yes
Grootpan	EC158	pssp	Alive	6	1.1	2	1.5	3	1.2-2	-1	-0.4	6	-0.4	2.26176	shrink	yes	yes
Grootpan	EC158	pssp	Alive	11	0.6	2	1.1	2	0.6-1.1	0	-0.5	5	-0.6	2.24071	shrink	yes	yes
Grootpan	EC158	pssp	Alive	15	0.6	2	0.6	2	0.6-1.1	0	0	4	0	2.30259	no-growth	yes	yes
Grootpan	EC158	pssp	Dead	20	NA	0	0.6	2	0.6-1.1	nd	NA	5	NA	NA	NA	yes	yes
Grootpan	EC159	esp	Alive	0	0.7	2	NA	NA	NA	nd	NA	NA	NA	NA	NA	no	no
Grootpan	EC159	esp	Alive	6	1.4	3	0.7	2	0.6-1.1	1	0.7	6	0.7	2.37024	growth	no	yes
Grootpan	EC159	esp	Alive	11	1.8	3	1.4	3	1.2-2	0	0.4	5	0.48	2.34947	growth	no	yes
Grootpan	EC159	esp	Alive	15	2	3	1.8	3	1.2-2	0	0.2	4	0.3	2.33214	growth	no	yes
Grootpan	EC159	esp	Alive	20	2.1	4	2	3	1.2-2	1	0.1	5	0.12	2.31451	growth	no	yes
Grootpan	EC159	esp	Alive	23	3	4	2.1	4	2.1-5	0	0.9	3	1.8	2.4681	growth	no	yes
Grootpan	EC159	esp	missing	31	NA	NA	NA	NA	NA	nd	NA	8	NA	NA	NA	no	yes
Grootpan	EC159	esp	Alive	36	1.8	3	3	4	2.1-5	-1	-1.2	13	-0.553846	2.24561	shrink	yes	yes
Grootpan	EC16	esp	Alive	0	2.9	4	NA	NA	NA	nd	NA	NA	NA	NA	NA	no	no
Grootpan	EC16	esp	Alive	6	3.2	4	2.9	4	2.1-5	0	0.3	6	0.3	2.33214	growth	no	no
Grootpan	EC16	esp	Dead	11	NA	0	3.2	4	2.1-5	nd	NA	5	NA	NA	NA	no	no
Grootpan	EC160	pssp	Alive	0	2.1	4	NA	NA	NA	nd	NA	NA	NA	NA	NA	no	no
Grootpan	EC160	pssp	Dead	6	NA	0	2.1	4	2.1-5	nd	NA	6	NA	NA	NA	no	no
Grootpan	EC162	pssp	Alive	0	1.2	3	NA	NA	NA	nd	NA	NA	NA	NA	NA	no	no
Grootpan	EC162	pssp	Dead	6	NA	0	1.2	3	1.2-2	nd	NA	6	NA	NA	NA	no	no
Grootpan	EC163	pssp	Alive	0	2.6	4	NA	NA	NA	nd	NA	NA	NA	NA	NA	no	no
Grootpan	EC163	pssp	Dead	6	NA	0	2.6	4	2.1-5	nd	NA	6	NA	NA	NA	no	no
Grootpan	EC164	esp	Alive	0	1	2	NA	NA	NA	nd	NA	NA	NA	NA	NA	no	no
Grootpan	EC164	esp	Alive	6	1	2	1	2	0.6-1.1	0	0	6	0	2.30259	no-growth	no	no
Grootpan	EC164	esp	Alive	11	1.2	3	1	2	0.6-1.1	1	0.2	5	0.24	2.3263	growth	no	no
Grootpan	EC164	esp	Alive	15	1.8	3	1.2	3	1.2-2	0	0.6	4	0.9	2.38876	growth	no	no
Grootpan	EC164	esp	Dead	20	NA	0	1.8	3	1.2-2	nd	NA	5	NA	NA	NA	no	no
Grootpan	EC165	esp	Alive	0	0.3	1	NA	NA	NA	nd	NA	NA	NA	NA	NA	no	no
Grootpan	EC165	esp	missing	6	NA	NA	0.3	1	< 0.6	nd	NA	6	NA	NA	NA	no	no
Grootpan	EC166	esp	Alive	0	0.3	1	NA	NA	NA	nd	NA	NA	NA	NA	NA	no	no
Grootpan	EC166	esp	missing	6	NA	NA	0.3	1	< 0.6	nd	NA	6	NA	NA	NA	no	no
Grootpan	EC167	esp	Alive	0	0.3	1	NA	NA	NA	nd	NA	NA	NA	NA	NA	no	no
Grootpan	EC167	esp	missing	6	NA	NA	0.3	1	< 0.6	nd	NA	6	NA	NA	NA	no	no
Grootpan	EC168	pssp	Alive	0	0.8	2	NA	NA	NA	nd	NA	NA	NA	NA	NA	no	no
Grootpan	EC168	pssp	missing	6	NA	NA	0.8	2	0.6-1.1	nd	NA	6	NA	NA	NA	no	no
Grootpan	EC169	esp	Alive	0	2.1	4	NA	NA	NA	nd	NA	NA	NA	NA	NA	no	no
Grootpan	EC169	esp	missing	6	NA	NA	2.1	4	2.1-5	nd	NA	6	NA	NA	NA	no	no
Grootpan	EC17	pssp	Alive	0	2.5	4	NA	NA	NA	nd	NA	NA	NA	NA	NA	no	yes
Grootpan	EC17	pssp	Alive	6	1.3	3	2.5	4	2.1-5	-1	-1.2	6	-1.2	2.17475	shrink	yes	yes
Grootpan	EC17	pssp	Alive	11	1.1	2	1.3	3	1.2-2	-1	-0.2	5	-0.24	2.27829	shrink	yes	yes
Grootpan	EC17	pssp	Alive	15	1.1	2	1.1	2	0.6-1.1	0	0	4	0	2.30259	no-growth	yes	yes
Grootpan	EC17	pssp	Dead	20	NA	0	1.1	2	0.6-1.1	nd	NA	5	NA	NA	NA	yes	yes
Grootpan	EC170	pssp	Alive	0	1.4	3	NA	NA	NA	nd	NA	NA	NA	NA	NA	no	yes
Grootpan	EC170	pssp	Alive	6	1.4	3	1.4	3	1.2-2	0	0	6	0	2.30259	no-growth	no	yes
Grootpan	EC170	pssp	Alive	11	0.7	2	1.4	3	1.2-2	-1	-0.7	5	-0.84	2.21485	shrink	yes	yes
Grootpan	EC170	pssp	missing	15	NA	NA	0.7	2	0.6-1.1	nd	NA	4	NA	NA	NA	yes	yes
Grootpan	EC171	pssp	Alive	0	1.3	3	NA	NA	NA	nd	NA	NA	NA	NA	NA	no	no
Grootpan	EC171	pssp	Dead	6	NA	0	1.3	3	1.2-2	nd	NA	6	NA	NA	NA	no	no
Grootpan	EC172	pssp	Alive	0	1.8	3	NA	NA	NA	nd	NA	NA	NA	NA	NA	no	no
Grootpan	EC172	pssp	missing	6	NA	NA	NA	NA	NA	nd	NA	6	NA	NA	NA	no	no
Grootpan	EC172	pssp	Alive	11	4.8	4	1.8	3	1.2-2	1	3	11	1.63636	2.45413	growth	no	no
Grootpan	EC172	pssp	missing	15	NA	NA	4.8	4	2.1-5	nd	NA	4	NA	NA	NA	no	no
Grootpan	EC173	pssp	Alive	0	1.2	3	NA	NA	NA	nd	NA	NA	NA	NA	NA	no	no
Grootpan	EC173	pssp	Dead	6	NA	0	1.2	3	1.2-2	nd	NA	6	NA	NA	NA	no	no
Grootpan	EC174	pssp	Alive	0	1.2	3	NA	NA	NA	nd	NA	NA	NA	NA	NA	no	no
Grootpan	EC174	pssp	Dead	6	NA	0	1.2	3	1.2-2	nd	NA	6	NA	NA	NA	no	no
Grootpan	EC175	pssp	Alive	0	1.6	3	NA	NA	NA	nd	NA	NA	NA	NA	NA	no	no
Grootpan	EC175	pssp	Alive	6	2.9	4	1.6	3	1.2-2	1	1.3	6	1.3	2.4248	growth	no	no
Grootpan	EC175	pssp	Alive	11	3.7	4	2.9	4	2.1-5	0	0.8	5	0.96	2.39425	growth	no	no
Grootpan	EC175	pssp	missing	15	NA	NA	3.7	4	2.1-5	nd	NA	4	NA	NA	NA	no	no
Grootpan	EC176	pssp	Alive	0	0.8	2	NA	NA	NA	nd	NA	NA	NA	NA	NA	no	no
Grootpan	EC176	pssp	Alive	6	0.8	2	0.8	2	0.6-1.1	0	0	6	0	2.30259	no-growth	no	no
Grootpan	EC176	pssp	Dead	11	NA	0	0.8	2	0.6-1.1	nd	NA	5	NA	NA	NA	no	no
Grootpan	EC177	pssp	Alive	0	1.8	3	NA	NA	NA	nd	NA	NA	NA	NA	NA	no	no
Grootpan	EC177	pssp	Alive	6	3	4	1.8	3	1.2-2	1	1.2	6	1.2	2.41591	growth	no	no
Grootpan	EC177	pssp	Alive	11	3	4	3	4	2.1-5	0	0	5	0	2.30259	no-growth	no	no
Grootpan	EC177	pssp	missing	15	NA	NA	3	4	2.1-5	nd	NA	4	NA	NA	NA	no	no
Grootpan	EC178	pssp	Alive	0	0.5	1	NA	NA	NA	nd	NA	NA	NA	NA	NA	no	no
Grootpan	EC178	pssp	Alive	6	0.6	2	0.5	1	< 0.6	1	0.1	6	0.1	2.31254	growth	no	no
Grootpan	EC178	pssp	Dead	11	NA	0	0.6	2	0.6-1.1	nd	NA	5	NA	NA	NA	no	no
Grootpan	EC179	pssp	Alive	0	1.8	3	NA	NA	NA	nd	NA	NA	NA	NA	NA	no	no
Grootpan	EC179	pssp	Dead	6	NA	0	1.8	3	1.2-2	nd	NA	6	NA	NA	NA	no	no
Grootpan	EC18	esp	Alive	0	0.3	1	NA	NA	NA	nd	NA	NA	NA	NA	NA	no	no
Grootpan	EC18	esp	Dead	6	NA	0	0.3	1	< 0.6	nd	NA	6	NA	NA	NA	no	no
Grootpan	EC180	pssp	Alive	0	3.5	4	NA	NA	NA	nd	NA	NA	NA	NA	NA	no	yes
Grootpan	EC180	pssp	Alive	6	0.8	2	3.5	4	2.1-5	-2	-2.7	6	-2.7	1.98787	shrink	yes	yes
Grootpan	EC180	pssp	Alive	11	0.9	2	0.8	2	0.6-1.1	0	0.1	5	0.12	2.31451	growth	yes	yes
Grootpan	EC180	pssp	missing	15	NA	NA	0.9	2	0.6-1.1	nd	NA	4	NA	NA	NA	yes	yes
Grootpan	EC181	pssp	Alive	0	2.3	4	NA	NA	NA	nd	NA	NA	NA	NA	NA	no	no
Grootpan	EC181	pssp	Alive	6	3.5	4	2.3	4	2.1-5	0	1.2	6	1.2	2.41591	growth	no	no
Grootpan	EC181	pssp	Alive	11	5	4	3.5	4	2.1-5	0	1.5	5	1.8	2.4681	growth	no	no
Grootpan	EC181	pssp	missing	15	NA	NA	5	4	2.1-5	nd	NA	4	NA	NA	NA	no	no
Grootpan	EC182	pssp	Alive	0	1.7	3	NA	NA	NA	nd	NA	NA	NA	NA	NA	no	no
Grootpan	EC182	pssp	Alive	6	2.3	4	1.7	3	1.2-2	1	0.6	6	0.6	2.36085	growth	no	no
Grootpan	EC182	pssp	Alive	11	3.6	4	2.3	4	2.1-5	0	1.3	5	1.56	2.44755	growth	no	no
Grootpan	EC182	pssp	missing	15	NA	NA	3.6	4	2.1-5	nd	NA	4	NA	NA	NA	no	no
Grootpan	EC183	pssp	Alive	0	0.7	2	NA	NA	NA	nd	NA	NA	NA	NA	NA	no	no
Grootpan	EC183	pssp	Alive	6	3.5	4	0.7	2	0.6-1.1	2	2.8	6	2.8	2.54945	growth	no	no
Grootpan	EC183	pssp	Dead	11	NA	0	3.5	4	2.1-5	nd	NA	5	NA	NA	NA	no	no
Grootpan	EC184	esp	Alive	0	0.3	1	NA	NA	NA	nd	NA	NA	NA	NA	NA	no	no
Grootpan	EC184	esp	Dead	6	NA	0	0.3	1	< 0.6	nd	NA	6	NA	NA	NA	no	no
Grootpan	EC185	pssp	Alive	0	1.1	2	NA	NA	NA	nd	NA	NA	NA	NA	NA	no	no
Grootpan	EC185	pssp	Alive	6	2.2	4	1.1	2	0.6-1.1	2	1.1	6	1.1	2.40695	growth	no	no
Grootpan	EC185	pssp	Alive	11	3.6	4	2.2	4	2.1-5	0	1.4	5	1.68	2.45788	growth	no	no
Grootpan	EC185	pssp	Alive	15	3.6	4	3.6	4	2.1-5	0	0	4	0	2.30259	no-growth	no	no
Grootpan	EC185	pssp	Dead	20	NA	0	3.6	4	2.1-5	nd	NA	5	NA	NA	NA	no	no
Grootpan	EC186	pssp	Alive	0	0.5	1	NA	NA	NA	nd	NA	NA	NA	NA	NA	no	yes
Grootpan	EC186	pssp	Alive	6	1.9	3	0.5	1	< 0.6	2	1.4	6	1.4	2.43361	growth	no	yes
Grootpan	EC186	pssp	Alive	11	3.6	4	1.9	3	1.2-2	1	1.7	5	2.04	2.48823	growth	no	yes
Grootpan	EC186	pssp	Alive	15	3.6	4	3.6	4	2.1-5	0	0	4	0	2.30259	no-growth	no	yes
Grootpan	EC186	pssp	Alive	20	3.4	4	3.6	4	2.1-5	0	-0.2	5	-0.24	2.27829	shrink	yes	yes
Grootpan	EC186	pssp	Alive	23	4.2	4	3.4	4	2.1-5	0	0.8	3	1.6	2.45101	growth	yes	yes
Grootpan	EC186	pssp	Alive	31	1.4	3	4.2	4	2.1-5	-1	-2.8	8	-2.1	2.06686	shrink	yes	yes
Grootpan	EC186	pssp	Alive	36	1.7	3	1.4	3	1.2-2	0	0.3	5	0.36	2.33795	growth	yes	yes
Grootpan	EC188	pssp	Alive	0	1.8	3	NA	NA	NA	nd	NA	NA	NA	NA	NA	no	yes
Grootpan	EC188	pssp	Alive	6	1.3	3	1.8	3	1.2-2	0	-0.5	6	-0.5	2.25129	shrink	yes	yes
Grootpan	EC188	pssp	Alive	11	1.6	3	1.3	3	1.2-2	0	0.3	5	0.36	2.33795	growth	yes	yes
Grootpan	EC188	pssp	Alive	15	1.6	3	1.6	3	1.2-2	0	0	4	0	2.30259	no-growth	yes	yes
Grootpan	EC188	pssp	Alive	20	1.6	3	1.6	3	1.2-2	0	0	5	0	2.30259	no-growth	yes	yes
Grootpan	EC188	pssp	Alive	23	0.9	2	1.6	3	1.2-2	-1	-0.7	3	-1.4	2.15176	shrink	yes	yes
Grootpan	EC188	pssp	Alive	31	1.7	3	0.9	2	0.6-1.1	1	0.8	8	0.6	2.36085	growth	yes	yes
Grootpan	EC188	pssp	Alive	36	4.1	4	1.7	3	1.2-2	1	2.4	5	2.88	2.55568	growth	yes	yes
Grootpan	EC189	pssp	Alive	0	0.7	2	NA	NA	NA	nd	NA	NA	NA	NA	NA	no	no
Grootpan	EC189	pssp	Alive	6	0.8	2	0.7	2	0.6-1.1	0	0.1	6	0.1	2.31254	growth	no	no
Grootpan	EC189	pssp	Dead	11	NA	0	0.8	2	0.6-1.1	nd	NA	5	NA	NA	NA	no	no
Grootpan	EC19	esp	Alive	0	0.7	2	NA	NA	NA	nd	NA	NA	NA	NA	NA	no	no
Grootpan	EC19	esp	Dead	6	NA	0	0.7	2	0.6-1.1	nd	NA	6	NA	NA	NA	no	no
Grootpan	EC190	pssp	Alive	0	0.5	1	NA	NA	NA	nd	NA	NA	NA	NA	NA	no	no
Grootpan	EC190	pssp	Dead	6	NA	0	0.5	1	< 0.6	nd	NA	6	NA	NA	NA	no	no
Grootpan	EC191	pssp	Alive	0	1.2	3	NA	NA	NA	nd	NA	NA	NA	NA	NA	no	no
Grootpan	EC191	pssp	missing	6	NA	NA	1.2	3	1.2-2	nd	NA	6	NA	NA	NA	no	no
Grootpan	EC192	pssp	Alive	0	0.6	2	NA	NA	NA	nd	NA	NA	NA	NA	NA	no	no
Grootpan	EC192	pssp	Dead	6	NA	0	0.6	2	0.6-1.1	nd	NA	6	NA	NA	NA	no	no
Grootpan	EC193	esp	Alive	0	0.5	1	NA	NA	NA	nd	NA	NA	NA	NA	NA	no	no
Grootpan	EC193	esp	Dead	6	NA	0	0.5	1	< 0.6	nd	NA	6	NA	NA	NA	no	no
Grootpan	EC194	esp	Alive	0	1.7	3	NA	NA	NA	nd	NA	NA	NA	NA	NA	no	yes
Grootpan	EC194	esp	Alive	6	3.3	4	1.7	3	1.2-2	1	1.6	6	1.6	2.45101	growth	no	yes
Grootpan	EC194	esp	Alive	11	3.1	4	3.3	4	2.1-5	0	-0.2	5	-0.24	2.27829	shrink	yes	yes
Grootpan	EC194	esp	missing	15	NA	NA	3.1	4	2.1-5	nd	NA	4	NA	NA	NA	yes	yes
Grootpan	EC195	pssp	Alive	0	0.5	1	NA	NA	NA	nd	NA	NA	NA	NA	NA	no	no
Grootpan	EC195	pssp	Dead	6	NA	0	0.5	1	< 0.6	nd	NA	6	NA	NA	NA	no	no
Grootpan	EC196	pssp	Alive	0	0.5	1	NA	NA	NA	nd	NA	NA	NA	NA	NA	no	yes
Grootpan	EC196	pssp	Alive	6	0.5	1	0.5	1	< 0.6	0	0	6	0	2.30259	no-growth	no	yes
Grootpan	EC196	pssp	Alive	11	0.3	1	0.5	1	< 0.6	0	-0.2	5	-0.24	2.27829	shrink	yes	yes
Grootpan	EC196	pssp	missing	15	NA	NA	0.3	1	< 0.6	nd	NA	4	NA	NA	NA	yes	yes
Grootpan	EC197	pssp	Alive	0	0.7	2	NA	NA	NA	nd	NA	NA	NA	NA	NA	no	no
Grootpan	EC197	pssp	Dead	6	NA	0	0.7	2	0.6-1.1	nd	NA	6	NA	NA	NA	no	no
Grootpan	EC198	esp	Alive	0	1.8	3	NA	NA	NA	nd	NA	NA	NA	NA	NA	no	yes
Grootpan	EC198	esp	Alive	6	1.8	3	1.8	3	1.2-2	0	0	6	0	2.30259	no-growth	no	yes
Grootpan	EC198	esp	Alive	11	1.4	3	1.8	3	1.2-2	0	-0.4	5	-0.48	2.25339	shrink	yes	yes
Grootpan	EC198	esp	Dead	15	NA	0	1.4	3	1.2-2	nd	NA	4	NA	NA	NA	yes	yes
Grootpan	EC199	pssp	Alive	0	0.6	2	NA	NA	NA	nd	NA	NA	NA	NA	NA	no	no
Grootpan	EC199	pssp	Alive	6	1	2	0.6	2	0.6-1.1	0	0.4	6	0.4	2.34181	growth	no	no
Grootpan	EC199	pssp	Dead	11	NA	0	1	2	0.6-1.1	nd	NA	5	NA	NA	NA	no	no
Grootpan	EC2	pssp	Alive	0	0.3	1	NA	NA	NA	nd	NA	NA	NA	NA	NA	no	no
Grootpan	EC2	pssp	Alive	6	0.5	1	0.3	1	< 0.6	0	0.2	6	0.2	2.32239	growth	no	no
Grootpan	EC2	pssp	Dead	11	NA	0	0.5	1	< 0.6	nd	NA	5	NA	NA	NA	no	no
Grootpan	EC20	esp	Alive	0	0.5	1	NA	NA	NA	nd	NA	NA	NA	NA	NA	no	no
Grootpan	EC20	esp	Dead	6	NA	0	0.5	1	< 0.6	nd	NA	6	NA	NA	NA	no	no
Grootpan	EC200	esp	Alive	0	1.2	3	NA	NA	NA	nd	NA	NA	NA	NA	NA	no	no
Grootpan	EC200	esp	Dead	6	NA	0	1.2	3	1.2-2	nd	NA	6	NA	NA	NA	no	no
Grootpan	EC21	pssp	Alive	0	0.5	1	NA	NA	NA	nd	NA	NA	NA	NA	NA	no	no
Grootpan	EC21	pssp	Alive	6	0.8	2	0.5	1	< 0.6	1	0.3	6	0.3	2.33214	growth	no	no
Grootpan	EC21	pssp	Alive	11	1.1	2	0.8	2	0.6-1.1	0	0.3	5	0.36	2.33795	growth	no	no
Grootpan	EC21	pssp	Alive	15	1.1	2	1.1	2	0.6-1.1	0	0	4	0	2.30259	no-growth	no	no
Grootpan	EC21	pssp	Alive	20	1.1	2	1.1	2	0.6-1.1	0	0	5	0	2.30259	no-growth	no	no
Grootpan	EC21	pssp	Dead	23	NA	0	1.1	2	0.6-1.1	nd	NA	3	NA	NA	NA	no	no
Grootpan	EC22	esp	Alive	0	0.7	2	NA	NA	NA	nd	NA	NA	NA	NA	NA	no	no
Grootpan	EC22	esp	Dead	6	NA	0	0.7	2	0.6-1.1	nd	NA	6	NA	NA	NA	no	no
Grootpan	EC23	esp	Alive	0	0.3	1	NA	NA	NA	nd	NA	NA	NA	NA	NA	no	no
Grootpan	EC23	esp	Dead	6	NA	0	0.3	1	< 0.6	nd	NA	6	NA	NA	NA	no	no
Grootpan	EC25	esp	Alive	0	0.7	2	NA	NA	NA	nd	NA	NA	NA	NA	NA	no	no
Grootpan	EC25	esp	Dead	6	NA	0	0.7	2	0.6-1.1	nd	NA	6	NA	NA	NA	no	no
Grootpan	EC26	esp	Alive	0	0.5	1	NA	NA	NA	nd	NA	NA	NA	NA	NA	no	no
Grootpan	EC26	esp	Dead	6	NA	0	0.5	1	< 0.6	nd	NA	6	NA	NA	NA	no	no
Grootpan	EC27	esp	Alive	0	0.5	1	NA	NA	NA	nd	NA	NA	NA	NA	NA	no	yes
Grootpan	EC27	esp	Alive	6	0.3	1	0.5	1	< 0.6	0	-0.2	6	-0.2	2.28238	shrink	yes	yes
Grootpan	EC27	esp	Alive	11	1.7	3	0.3	1	< 0.6	2	1.4	5	1.68	2.45788	growth	yes	yes
Grootpan	EC27	esp	Dead	15	NA	0	1.7	3	1.2-2	nd	NA	4	NA	NA	NA	yes	yes
Grootpan	EC28	esp	Alive	0	0.5	1	NA	NA	NA	nd	NA	NA	NA	NA	NA	no	no
Grootpan	EC28	esp	Dead	6	NA	0	0.5	1	< 0.6	nd	NA	6	NA	NA	NA	no	no
Grootpan	EC29	esp	Alive	0	0.6	2	NA	NA	NA	nd	NA	NA	NA	NA	NA	no	no
Grootpan	EC29	esp	Dead	6	NA	0	0.6	2	0.6-1.1	nd	NA	6	NA	NA	NA	no	no
Grootpan	EC3	esp	Alive	0	2.4	4	NA	NA	NA	nd	NA	NA	NA	NA	NA	no	yes
Grootpan	EC3	esp	Alive	6	2.6	4	2.4	4	2.1-5	0	0.2	6	0.2	2.32239	growth	no	yes
Grootpan	EC3	esp	Alive	11	2.2	4	2.6	4	2.1-5	0	-0.4	5	-0.48	2.25339	shrink	yes	yes
Grootpan	EC3	esp	Alive	15	2.2	4	2.2	4	2.1-5	0	0	4	0	2.30259	no-growth	yes	yes
Grootpan	EC3	esp	Alive	20	2.2	4	2.2	4	2.1-5	0	0	5	0	2.30259	no-growth	yes	yes
Grootpan	EC3	esp	Dead	23	NA	0	2.2	4	2.1-5	nd	NA	3	NA	NA	NA	yes	yes
Grootpan	EC30	pssp	Alive	0	0.3	1	NA	NA	NA	nd	NA	NA	NA	NA	NA	no	no
Grootpan	EC30	pssp	Dead	6	NA	0	0.3	1	< 0.6	nd	NA	6	NA	NA	NA	no	no
Grootpan	EC33	esp	Alive	0	0.7	2	NA	NA	NA	nd	NA	NA	NA	NA	NA	no	yes
Grootpan	EC33	esp	Alive	6	0.2	1	0.7	2	0.6-1.1	-1	-0.5	6	-0.5	2.25129	shrink	yes	yes
Grootpan	EC33	esp	Alive	11	0.4	1	0.3	1	< 0.6	0	0.2	5	0.24	2.3263	growth	yes	yes
Grootpan	EC33	esp	Dead	15	NA	0	0.4	1	< 0.6	nd	NA	4	NA	NA	NA	yes	yes
Grootpan	EC36	esp	Alive	0	2.4	4	NA	NA	NA	nd	NA	NA	NA	NA	NA	no	yes
Grootpan	EC36	esp	Alive	6	2.7	4	2.4	4	2.1-5	0	0.3	6	0.3	2.33214	growth	no	yes
Grootpan	EC36	esp	Alive	11	5.2	5	2.7	4	2.1-5	1	2.5	5	3	2.56495	growth	no	yes
Grootpan	EC36	esp	Alive	15	5.2	5	5.2	5	> 5	0	0	4	0	2.30259	no-growth	no	yes
Grootpan	EC36	esp	Alive	20	4	4	5.2	5	> 5	-1	-1.2	5	-1.44	2.1471	shrink	yes	yes
Grootpan	EC36	esp	Alive	23	4.7	4	4	4	2.1-5	0	0.7	3	1.4	2.43361	growth	yes	yes
Grootpan	EC36	esp	Dead	31	NA	0	4.7	4	2.1-5	nd	NA	8	NA	NA	NA	yes	yes
Grootpan	EC37	esp	Alive	0	0.6	2	NA	NA	NA	nd	NA	NA	NA	NA	NA	no	yes
Grootpan	EC37	esp	Alive	6	1	2	0.6	2	0.6-1.1	0	0.4	6	0.4	2.34181	growth	no	yes
Grootpan	EC37	esp	Alive	11	1.2	3	1	2	0.6-1.1	1	0.2	5	0.24	2.3263	growth	no	yes
Grootpan	EC37	esp	Alive	15	1.5	3	1.2	3	1.2-2	0	0.3	4	0.45	2.3466	growth	no	yes
Grootpan	EC37	esp	Alive	20	1.4	3	1.5	3	1.2-2	0	-0.1	5	-0.12	2.29051	shrink	yes	yes
Grootpan	EC37	esp	Alive	23	1.7	3	1.4	3	1.2-2	0	0.3	3	0.6	2.36085	growth	yes	yes
Grootpan	EC37	esp	Dead	31	NA	0	1.7	3	1.2-2	nd	NA	8	NA	NA	NA	yes	yes
Grootpan	EC38	esp	Alive	0	0.6	2	NA	NA	NA	nd	NA	NA	NA	NA	NA	no	no
Grootpan	EC38	esp	Dead	6	NA	0	0.6	2	0.6-1.1	nd	NA	6	NA	NA	NA	no	no
Grootpan	EC39	esp	Alive	0	0.7	2	NA	NA	NA	nd	NA	NA	NA	NA	NA	no	no
Grootpan	EC39	esp	Dead	6	NA	0	0.7	2	0.6-1.1	nd	NA	6	NA	NA	NA	no	no
Grootpan	EC4	esp	Alive	0	1.2	3	NA	NA	NA	nd	NA	NA	NA	NA	NA	no	no
Grootpan	EC4	esp	Alive	6	2.8	4	1.2	3	1.2-2	1	1.6	6	1.6	2.45101	growth	no	no
Grootpan	EC4	esp	Dead	11	NA	0	2.8	4	2.1-5	nd	NA	5	NA	NA	NA	no	no
Grootpan	EC40	esp	Alive	0	0.3	1	NA	NA	NA	nd	NA	NA	NA	NA	NA	no	no
Grootpan	EC40	esp	Alive	6	1.1	2	0.3	1	< 0.6	1	0.8	6	0.8	2.37955	growth	no	no
Grootpan	EC40	esp	Alive	11	1.1	2	1.1	2	0.6-1.1	0	0	5	0	2.30259	no-growth	no	no
Grootpan	EC40	esp	Alive	15	1.1	2	1.1	2	0.6-1.1	0	0	4	0	2.30259	no-growth	no	no
Grootpan	EC40	esp	Alive	20	1.1	2	1.1	2	0.6-1.1	0	0	5	0	2.30259	no-growth	no	no
Grootpan	EC40	esp	Alive	23	1.6	3	1.1	2	0.6-1.1	1	0.5	3	1	2.3979	growth	no	no
Grootpan	EC40	esp	Dead	31	NA	0	1.6	3	1.2-2	nd	NA	8	NA	NA	NA	no	no
Grootpan	EC41	esp	Alive	0	0.3	1	NA	NA	NA	nd	NA	NA	NA	NA	NA	no	no
Grootpan	EC41	esp	Dead	6	NA	0	0.3	1	< 0.6	nd	NA	6	NA	NA	NA	no	no
Grootpan	EC43	pssp	Alive	0	0.3	1	NA	NA	NA	nd	NA	NA	NA	NA	NA	no	no
Grootpan	EC43	pssp	Alive	6	0.7	2	0.3	1	< 0.6	1	0.4	6	0.4	2.34181	growth	no	no
Grootpan	EC43	pssp	Alive	11	1.2	3	0.7	2	0.6-1.1	1	0.5	5	0.6	2.36085	growth	no	no
Grootpan	EC43	pssp	Alive	15	1.2	3	1.2	3	1.2-2	0	0	4	0	2.30259	no-growth	no	no
Grootpan	EC43	pssp	Alive	20	3.1	4	1.2	3	1.2-2	1	1.9	5	2.28	2.50797	growth	no	no
Grootpan	EC43	pssp	Alive	23	4.3	4	3.1	4	2.1-5	0	1.2	3	2.4	2.5177	growth	no	no
Grootpan	EC43	pssp	Alive	31	9.5	5	4.3	4	2.1-5	1	5.2	8	3.9	2.63189	growth	no	no
Grootpan	EC43	pssp	Alive	36	11.5	5	9.5	#N/A	> 5	#N/A	2	5	2.4	2.5177	growth	no	no
Grootpan	EC44	esp	Alive	0	2	3	NA	NA	NA	nd	NA	NA	NA	NA	NA	no	no
Grootpan	EC44	esp	Dead	6	NA	0	2	3	1.2-2	nd	NA	6	NA	NA	NA	no	no
Grootpan	EC45	esp	Alive	0	0.3	1	NA	NA	NA	nd	NA	NA	NA	NA	NA	no	yes
Grootpan	EC45	esp	Alive	6	0.5	1	0.3	1	< 0.6	0	0.2	6	0.2	2.32239	growth	no	yes
Grootpan	EC45	esp	Alive	11	0.5	1	0.5	1	< 0.6	0	0	5	0	2.30259	no-growth	no	yes
Grootpan	EC45	esp	Alive	15	0.5	1	0.5	1	< 0.6	0	0	4	0	2.30259	no-growth	no	yes
Grootpan	EC45	esp	Alive	20	1.3	3	0.5	1	< 0.6	2	0.8	5	0.96	2.39425	growth	no	yes
Grootpan	EC45	esp	Alive	23	2.3	4	1.3	3	1.2-2	1	1	3	2	2.48491	growth	no	yes
Grootpan	EC45	esp	Alive	31	2.9	4	2.3	4	2.1-5	0	0.6	8	0.45	2.3466	growth	no	yes
Grootpan	EC45	esp	Alive	36	2	3	2.9	4	2.1-5	-1	-0.9	5	-1.08	2.1883	shrink	yes	yes
Grootpan	EC46	pssp	Alive	0	0.3	1	NA	NA	NA	nd	NA	NA	NA	NA	NA	no	no
Grootpan	EC46	pssp	Dead	6	NA	0	0.3	1	< 0.6	nd	NA	6	NA	NA	NA	no	no
Grootpan	EC47	pssp	Alive	0	0.3	1	NA	NA	NA	nd	NA	NA	NA	NA	NA	no	no
Grootpan	EC47	pssp	Alive	6	0.9	2	0.3	1	< 0.6	1	0.6	6	0.6	2.36085	growth	no	no
Grootpan	EC47	pssp	Alive	11	2.1	4	0.9	2	0.6-1.1	2	1.2	5	1.44	2.43712	growth	no	no
Grootpan	EC47	pssp	Dead	15	NA	0	2.1	4	2.1-5	nd	NA	4	NA	NA	NA	no	no
Grootpan	EC48	pssp	Alive	0	0.3	1	NA	NA	NA	nd	NA	NA	NA	NA	NA	no	no
Grootpan	EC48	pssp	Alive	6	0.5	1	0.3	1	< 0.6	0	0.2	6	0.2	2.32239	growth	no	no
Grootpan	EC48	pssp	Dead	11	NA	0	0.5	1	< 0.6	nd	NA	5	NA	NA	NA	no	no
Grootpan	EC49	esp	Alive	0	0.9	2	NA	NA	NA	nd	NA	NA	NA	NA	NA	no	yes
Grootpan	EC49	esp	Alive	6	0.7	2	0.9	2	0.6-1.1	0	-0.2	6	-0.2	2.28238	shrink	yes	yes
Grootpan	EC49	esp	Alive	11	0.8	2	0.7	2	0.6-1.1	0	0.1	5	0.12	2.31451	growth	yes	yes
Grootpan	EC49	esp	Alive	15	0.8	2	0.8	2	0.6-1.1	0	0	4	0	2.30259	no-growth	yes	yes
Grootpan	EC49	esp	Dead	20	NA	0	0.8	2	0.6-1.1	nd	NA	5	NA	NA	NA	yes	yes
Grootpan	EC5	esp	Alive	0	1	2	NA	NA	NA	nd	NA	NA	NA	NA	NA	no	no
Grootpan	EC5	esp	Alive	6	1	2	1	2	0.6-1.1	0	0	6	0	2.30259	no-growth	no	no
Grootpan	EC5	esp	Dead	11	NA	0	1	2	0.6-1.1	nd	NA	5	NA	NA	NA	no	no
Grootpan	EC50	esp	Alive	0	0.7	2	NA	NA	NA	nd	NA	NA	NA	NA	NA	no	no
Grootpan	EC50	esp	missing	6	NA	NA	NA	NA	NA	nd	NA	6	NA	NA	NA	no	no
Grootpan	EC50	esp	Alive	11	0.7	2	0.7	2	0.6-1.1	0	0	11	0	2.30259	no-growth	no	no
Grootpan	EC50	esp	Alive	15	0.7	2	0.7	2	0.6-1.1	0	0	4	0	2.30259	no-growth	no	no
Grootpan	EC50	esp	Alive	20	0.9	2	0.7	2	0.6-1.1	0	0.2	5	0.24	2.3263	growth	no	no
Grootpan	EC50	esp	Dead	23	NA	0	0.9	2	0.6-1.1	nd	NA	3	NA	NA	NA	no	no
Grootpan	EC51	esp	Alive	0	0.5	1	NA	NA	NA	nd	NA	NA	NA	NA	NA	no	no
Grootpan	EC51	esp	Dead	6	NA	0	0.5	1	< 0.6	nd	NA	6	NA	NA	NA	no	no
Grootpan	EC52	pssp	Alive	0	1.7	3	NA	NA	NA	nd	NA	NA	NA	NA	NA	no	yes
Grootpan	EC52	pssp	Alive	6	1.7	3	1.7	3	1.2-2	0	0	6	0	2.30259	no-growth	no	yes
Grootpan	EC52	pssp	Alive	11	0.6	2	1.7	3	1.2-2	-1	-1.1	5	-1.32	2.16102	shrink	yes	yes
Grootpan	EC52	pssp	Dead	15	NA	0	0.6	2	0.6-1.1	nd	NA	4	NA	NA	NA	yes	yes
Grootpan	EC53	esp	Alive	0	0.7	2	NA	NA	NA	nd	NA	NA	NA	NA	NA	no	yes
Grootpan	EC53	esp	Alive	6	0.5	1	0.7	2	0.6-1.1	-1	-0.2	6	-0.2	2.28238	shrink	yes	yes
Grootpan	EC53	esp	Alive	11	1.2	3	0.5	1	< 0.6	2	0.7	5	0.84	2.38324	growth	yes	yes
Grootpan	EC53	esp	Dead	15	NA	0	1.2	3	1.2-2	nd	NA	4	NA	NA	NA	yes	yes
Grootpan	EC54	esp	Alive	0	0.3	1	NA	NA	NA	nd	NA	NA	NA	NA	NA	no	no
Grootpan	EC54	esp	Dead	6	NA	0	0.3	1	< 0.6	nd	NA	6	NA	NA	NA	no	no
Grootpan	EC55	esp	Alive	0	0.8	2	NA	NA	NA	nd	NA	NA	NA	NA	NA	no	no
Grootpan	EC55	esp	Dead	6	NA	0	0.8	2	0.6-1.1	nd	NA	6	NA	NA	NA	no	no
Grootpan	EC56	esp	Alive	0	0.5	1	NA	NA	NA	nd	NA	NA	NA	NA	NA	no	no
Grootpan	EC56	esp	Alive	6	0.5	1	0.5	1	< 0.6	0	0	6	0	2.30259	no-growth	no	no
Grootpan	EC56	esp	Dead	11	NA	0	0.5	1	< 0.6	nd	NA	5	NA	NA	NA	no	no
Grootpan	EC57	pssp	Alive	0	2	3	NA	NA	NA	nd	NA	NA	NA	NA	NA	no	no
Grootpan	EC57	pssp	Dead	6	NA	0	2	3	1.2-2	nd	NA	6	NA	NA	NA	no	no
Grootpan	EC58	pssp	Alive	0	1.3	3	NA	NA	NA	nd	NA	NA	NA	NA	NA	no	no
Grootpan	EC58	pssp	Dead	6	NA	0	1.3	3	1.2-2	nd	NA	6	NA	NA	NA	no	no
Grootpan	EC59	esp	Alive	0	0.5	1	NA	NA	NA	nd	NA	NA	NA	NA	NA	no	no
Grootpan	EC59	esp	Dead	6	NA	0	0.5	1	< 0.6	nd	NA	6	NA	NA	NA	no	no
Grootpan	EC61	esp	Alive	0	0.5	1	NA	NA	NA	nd	NA	NA	NA	NA	NA	no	no
Grootpan	EC61	esp	Alive	6	2.6	4	0.5	1	< 0.6	3	2.1	6	2.1	2.49321	growth	no	no
Grootpan	EC61	esp	Dead	11	NA	0	2.6	4	2.1-5	nd	NA	5	NA	NA	NA	no	no
Grootpan	EC62	esp	Alive	0	1.3	3	NA	NA	NA	nd	NA	NA	NA	NA	NA	no	no
Grootpan	EC62	esp	Dead	6	NA	0	1.3	3	1.2-2	nd	NA	6	NA	NA	NA	no	no
Grootpan	EC63	pssp	Alive	0	2.8	4	NA	NA	NA	nd	NA	NA	NA	NA	NA	no	no
Grootpan	EC63	pssp	Dead	6	NA	0	2.8	4	2.1-5	nd	NA	6	NA	NA	NA	no	no
Grootpan	EC64	esp	Alive	0	1.3	3	NA	NA	NA	nd	NA	NA	NA	NA	NA	no	no
Grootpan	EC64	esp	Alive	6	1.4	3	1.3	3	1.2-2	0	0.1	6	0.1	2.31254	growth	no	no
Grootpan	EC64	esp	Dead	11	NA	0	1.4	3	1.2-2	nd	NA	5	NA	NA	NA	no	no
Grootpan	EC65	pssp	Alive	0	1.3	3	NA	NA	NA	nd	NA	NA	NA	NA	NA	no	no
Grootpan	EC65	pssp	missing	6	NA	NA	NA	NA	NA	nd	NA	6	NA	NA	NA	no	no
Grootpan	EC65	pssp	Alive	11	2	3	1.3	3	1.2-2	0	0.7	11	0.381818	2.34006	growth	no	no
Grootpan	EC65	pssp	Alive	15	2	3	2	3	1.2-2	0	0	4	0	2.30259	no-growth	no	no
Grootpan	EC65	pssp	missing	20	NA	NA	2	3	1.2-2	nd	NA	5	NA	NA	NA	no	no
Grootpan	EC65	pssp	Dead	23	NA	0	NA	NA	NA	nd	NA	3	NA	NA	NA	no	no
Grootpan	EC66	esp	Alive	0	0.5	1	NA	NA	NA	nd	NA	NA	NA	NA	NA	no	yes
Grootpan	EC66	esp	Alive	6	3.6	4	0.5	1	< 0.6	3	3.1	6	3.1	2.57261	growth	no	yes
Grootpan	EC66	esp	Alive	11	2.1	4	3.6	4	2.1-5	0	-1.5	5	-1.8	2.10413	shrink	yes	yes
Grootpan	EC66	esp	Dead	15	NA	0	2.1	4	2.1-5	nd	NA	4	NA	NA	NA	yes	yes
Grootpan	EC67	pssp	Alive	0	2.6	4	NA	NA	NA	nd	NA	NA	NA	NA	NA	no	yes
Grootpan	EC67	pssp	Alive	6	0.5	1	2.6	4	2.1-5	-3	-2.1	6	-2.1	2.06686	shrink	yes	yes
Grootpan	EC67	pssp	Alive	11	4.2	4	0.5	1	< 0.6	3	3.7	5	4.44	2.67	growth	yes	yes
Grootpan	EC67	pssp	Alive	15	4.2	4	4.2	4	2.1-5	0	0	4	0	2.30259	no-growth	yes	yes
Grootpan	EC67	pssp	Dead	20	NA	0	4.2	4	2.1-5	nd	NA	5	NA	NA	NA	yes	yes
Grootpan	EC68	esp	Alive	0	1.6	3	NA	NA	NA	nd	NA	NA	NA	NA	NA	no	yes
Grootpan	EC68	esp	Alive	6	0.6	2	1.6	3	1.2-2	-1	-1	6	-1	2.19722	shrink	yes	yes
Grootpan	EC68	esp	Alive	11	1.3	3	0.6	2	0.6-1.1	1	0.7	5	0.84	2.38324	growth	yes	yes
Grootpan	EC68	esp	Alive	15	1.3	3	1.3	3	1.2-2	0	0	4	0	2.30259	no-growth	yes	yes
Grootpan	EC68	esp	Alive	20	1.7	3	1.3	3	1.2-2	0	0.4	5	0.48	2.34947	growth	yes	yes
Grootpan	EC68	esp	Alive	23	2.7	4	1.7	3	1.2-2	1	1	3	2	2.48491	growth	yes	yes
Grootpan	EC68	esp	Alive	31	4	4	2.7	4	2.1-5	0	1.3	8	0.975	2.39562	growth	yes	yes
Grootpan	EC68	esp	Dead	36	NA	0	4	4	2.1-5	nd	NA	5	NA	NA	NA	yes	yes
Grootpan	EC69	esp	Alive	0	0.5	1	NA	NA	NA	nd	NA	NA	NA	NA	NA	no	no
Grootpan	EC69	esp	Dead	6	NA	0	0.5	1	< 0.6	nd	NA	6	NA	NA	NA	no	no
Grootpan	EC7	esp	Alive	0	0.8	2	NA	NA	NA	nd	NA	NA	NA	NA	NA	no	no
Grootpan	EC7	esp	Dead	6	NA	0	0.8	2	0.6-1.1	nd	NA	6	NA	NA	NA	no	no
Grootpan	EC70	esp	Alive	0	0.3	1	NA	NA	NA	nd	NA	NA	NA	NA	NA	no	no
Grootpan	EC70	esp	Dead	6	NA	0	0.3	1	< 0.6	nd	NA	6	NA	NA	NA	no	no
Grootpan	EC72	esp	Alive	0	0.6	2	NA	NA	NA	nd	NA	NA	NA	NA	NA	no	no
Grootpan	EC72	esp	Dead	6	NA	0	0.6	2	0.6-1.1	nd	NA	6	NA	NA	NA	no	no
Grootpan	EC73	esp	Alive	0	0.5	1	NA	NA	NA	nd	NA	NA	NA	NA	NA	no	no
Grootpan	EC73	esp	missing	6	NA	NA	NA	NA	NA	nd	NA	6	NA	NA	NA	no	no
Grootpan	EC73	esp	Alive	11	1.3	3	0.5	1	< 0.6	2	0.8	11	0.436364	2.3453	growth	no	no
Grootpan	EC73	esp	Alive	15	1.3	3	1.3	3	1.2-2	0	0	4	0	2.30259	no-growth	no	no
Grootpan	EC73	esp	Dead	20	NA	0	1.3	3	1.2-2	nd	NA	5	NA	NA	NA	no	no
Grootpan	EC75	pssp	Alive	0	1.4	3	NA	NA	NA	nd	NA	NA	NA	NA	NA	no	yes
Grootpan	EC75	pssp	Alive	6	0.8	2	1.4	3	1.2-2	-1	-0.6	6	-0.6	2.24071	shrink	yes	yes
Grootpan	EC75	pssp	Alive	11	3.1	4	0.8	2	0.6-1.1	2	2.3	5	2.76	2.54632	growth	yes	yes
Grootpan	EC75	pssp	Dead	15	NA	0	3.1	4	2.1-5	nd	NA	4	NA	NA	NA	yes	yes
Grootpan	EC76	pssp	Alive	0	1.5	3	NA	NA	NA	nd	NA	NA	NA	NA	NA	no	no
Grootpan	EC76	pssp	Alive	6	3	4	1.5	3	1.2-2	1	1.5	6	1.5	2.44235	growth	no	no
Grootpan	EC76	pssp	Dead	11	NA	0	3	4	2.1-5	nd	NA	5	NA	NA	NA	no	no
Grootpan	EC77	pssp	Alive	0	1.5	3	NA	NA	NA	nd	NA	NA	NA	NA	NA	no	yes
Grootpan	EC77	pssp	Alive	6	1	2	1.5	3	1.2-2	-1	-0.5	6	-0.5	2.25129	shrink	yes	yes
Grootpan	EC77	pssp	Alive	11	2.6	4	1	2	0.6-1.1	2	1.6	5	1.92	2.47822	growth	yes	yes
Grootpan	EC77	pssp	Dead	15	NA	0	2.6	4	2.1-5	nd	NA	4	NA	NA	NA	yes	yes
Grootpan	EC78	esp	Alive	0	1.1	2	NA	NA	NA	nd	NA	NA	NA	NA	NA	no	yes
Grootpan	EC78	esp	Alive	6	1	2	1.1	2	0.6-1.1	0	-0.1	6	-0.1	2.29253	shrink	yes	yes
Grootpan	EC78	esp	Alive	11	0.7	2	1	2	0.6-1.1	0	-0.3	5	-0.36	2.26592	shrink	yes	yes
Grootpan	EC78	esp	Alive	15	0.7	2	0.7	2	0.6-1.1	0	0	4	0	2.30259	no-growth	yes	yes
Grootpan	EC78	esp	Dead	20	NA	0	0.7	2	0.6-1.1	nd	NA	5	NA	NA	NA	yes	yes
Grootpan	EC79	esp	Alive	0	1	2	NA	NA	NA	nd	NA	NA	NA	NA	NA	no	no
Grootpan	EC79	esp	Dead	6	NA	0	1	2	0.6-1.1	nd	NA	6	NA	NA	NA	no	no
Grootpan	EC80	esp	Alive	0	0.7	2	NA	NA	NA	nd	NA	NA	NA	NA	NA	no	no
Grootpan	EC80	esp	Dead	6	NA	0	0.7	2	0.6-1.1	nd	NA	6	NA	NA	NA	no	no
Grootpan	EC81	esp	Alive	0	1	2	NA	NA	NA	nd	NA	NA	NA	NA	NA	no	no
Grootpan	EC81	esp	Dead	6	NA	0	1	2	0.6-1.1	nd	NA	6	NA	NA	NA	no	no
Grootpan	EC82	esp	Alive	0	1.8	3	NA	NA	NA	nd	NA	NA	NA	NA	NA	no	no
Grootpan	EC82	esp	Dead	6	NA	0	1.8	3	1.2-2	nd	NA	6	NA	NA	NA	no	no
Grootpan	EC83	esp	Alive	0	0.5	1	NA	NA	NA	nd	NA	NA	NA	NA	NA	no	no
Grootpan	EC83	esp	Dead	6	NA	0	0.5	1	< 0.6	nd	NA	6	NA	NA	NA	no	no
Grootpan	EC84	pssp	Alive	0	2.7	4	NA	NA	NA	nd	NA	NA	NA	NA	NA	no	yes
Grootpan	EC84	pssp	Alive	6	4.1	4	2.7	4	2.1-5	0	1.4	6	1.4	2.43361	growth	no	yes
Grootpan	EC84	pssp	Alive	11	4.3	4	4.1	4	2.1-5	0	0.2	5	0.24	2.3263	growth	no	yes
Grootpan	EC84	pssp	Alive	15	4.3	4	4.3	4	2.1-5	0	0	4	0	2.30259	no-growth	no	yes
Grootpan	EC84	pssp	Alive	20	0.8	2	4.3	4	2.1-5	-2	-3.5	5	-4.2	1.75786	shrink	yes	yes
Grootpan	EC84	pssp	Alive	23	0.3	1	0.8	2	0.6-1.1	-1	-0.5	3	-1	2.19722	shrink	yes	yes
Grootpan	EC84	pssp	Dead	31	NA	0	0.3	1	< 0.6	nd	NA	8	NA	NA	NA	yes	yes
Grootpan	EC85	esp	Alive	0	0.5	1	NA	NA	NA	nd	NA	NA	NA	NA	NA	no	no
Grootpan	EC85	esp	Alive	6	1.4	3	0.5	1	< 0.6	2	0.9	6	0.9	2.38876	growth	no	no
Grootpan	EC85	esp	Dead	11	NA	0	1.4	3	1.2-2	nd	NA	5	NA	NA	NA	no	no
Grootpan	EC86	esp	Alive	0	0.6	2	NA	NA	NA	nd	NA	NA	NA	NA	NA	no	no
Grootpan	EC86	esp	Dead	6	NA	0	0.6	2	0.6-1.1	nd	NA	6	NA	NA	NA	no	no
Grootpan	EC87	esp	Alive	0	0.6	2	NA	NA	NA	nd	NA	NA	NA	NA	NA	no	no
Grootpan	EC87	esp	missing	6	NA	NA	NA	NA	NA	nd	NA	6	NA	NA	NA	no	no
Grootpan	EC87	esp	Alive	11	1.2	3	0.6	2	0.6-1.1	1	0.6	11	0.327273	2.33479	growth	no	no
Grootpan	EC87	esp	Alive	15	1.2	3	1.2	3	1.2-2	0	0	4	0	2.30259	no-growth	no	no
Grootpan	EC87	esp	Alive	20	1.2	3	1.2	3	1.2-2	0	0	5	0	2.30259	no-growth	no	no
Grootpan	EC87	esp	Alive	23	1.5	3	1.2	3	1.2-2	0	0.3	3	0.6	2.36085	growth	no	no
Grootpan	EC87	esp	Dead	31	NA	0	1.5	3	1.2-2	nd	NA	8	NA	NA	NA	no	no
Grootpan	EC88	esp	Alive	0	0.5	1	NA	NA	NA	nd	NA	NA	NA	NA	NA	no	no
Grootpan	EC88	esp	Alive	6	1	2	0.5	1	< 0.6	1	0.5	6	0.5	2.35138	growth	no	no
Grootpan	EC88	esp	Dead	11	NA	0	1	2	0.6-1.1	nd	NA	5	NA	NA	NA	no	no
Grootpan	EC89	esp	Alive	0	0.5	1	NA	NA	NA	nd	NA	NA	NA	NA	NA	no	no
Grootpan	EC89	esp	Dead	6	NA	0	0.5	1	< 0.6	nd	NA	6	NA	NA	NA	no	no
Grootpan	EC9	esp	Alive	0	0.6	2	NA	NA	NA	nd	NA	NA	NA	NA	NA	no	no
Grootpan	EC9	esp	Dead	6	NA	0	0.6	2	0.6-1.1	nd	NA	6	NA	NA	NA	no	no
Grootpan	EC90	esp	Alive	0	1	2	NA	NA	NA	nd	NA	NA	NA	NA	NA	no	no
Grootpan	EC90	esp	Dead	6	NA	0	1	2	0.6-1.1	nd	NA	6	NA	NA	NA	no	no
Grootpan	EC91	esp	Alive	0	0.5	1	NA	NA	NA	nd	NA	NA	NA	NA	NA	no	no
Grootpan	EC91	esp	Alive	6	0.6	2	0.5	1	< 0.6	1	0.1	6	0.1	2.31254	growth	no	no
Grootpan	EC91	esp	Alive	11	0.6	2	0.6	2	0.6-1.1	0	0	5	0	2.30259	no-growth	no	no
Grootpan	EC91	esp	Dead	15	NA	0	0.6	2	0.6-1.1	nd	NA	4	NA	NA	NA	no	no
Grootpan	EC93	esp	Alive	0	0.8	2	NA	NA	NA	nd	NA	NA	NA	NA	NA	no	no
Grootpan	EC93	esp	Alive	6	0.8	2	0.8	2	0.6-1.1	0	0	6	0	2.30259	no-growth	no	no
Grootpan	EC93	esp	Dead	11	NA	0	0.8	2	0.6-1.1	nd	NA	5	NA	NA	NA	no	no
Grootpan	EC94	pssp	Alive	0	2	3	NA	NA	NA	nd	NA	NA	NA	NA	NA	no	yes
Grootpan	EC94	pssp	Alive	6	3.7	4	2	3	1.2-2	1	1.7	6	1.7	2.45959	growth	no	yes
Grootpan	EC94	pssp	Alive	11	2.3	4	3.7	4	2.1-5	0	-1.4	5	-1.68	2.11866	shrink	yes	yes
Grootpan	EC94	pssp	Alive	15	1	2	2.3	4	2.1-5	-2	-1.3	4	-1.95	2.08567	shrink	yes	yes
Grootpan	EC94	pssp	Dead	20	NA	0	1	2	0.6-1.1	nd	NA	5	NA	NA	NA	yes	yes
Grootpan	EC95	esp	Alive	0	1.2	3	NA	NA	NA	nd	NA	NA	NA	NA	NA	no	yes
Grootpan	EC95	esp	Alive	6	1	2	1.2	3	1.2-2	-1	-0.2	6	-0.2	2.28238	shrink	yes	yes
Grootpan	EC95	esp	Dead	11	NA	0	1	2	0.6-1.1	nd	NA	5	NA	NA	NA	yes	yes
Grootpan	EC96	esp	Alive	0	0.3	1	NA	NA	NA	nd	NA	NA	NA	NA	NA	no	no
Grootpan	EC96	esp	Dead	6	NA	0	0.3	1	< 0.6	nd	NA	6	NA	NA	NA	no	no
Grootpan	EC97	esp	Alive	0	0.3	1	NA	NA	NA	nd	NA	NA	NA	NA	NA	no	no
Grootpan	EC97	esp	Dead	6	NA	0	0.3	1	< 0.6	nd	NA	6	NA	NA	NA	no	no
Grootpan	EC98	pssp	Alive	0	0.7	2	NA	NA	NA	nd	NA	NA	NA	NA	NA	no	no
Grootpan	EC98	pssp	Alive	6	0.7	2	0.7	2	0.6-1.1	0	0	6	0	2.30259	no-growth	no	no
Grootpan	EC98	pssp	Alive	11	1.1	2	0.7	2	0.6-1.1	0	0.4	5	0.48	2.34947	growth	no	no
Grootpan	EC98	pssp	Alive	15	1.1	2	1.1	2	0.6-1.1	0	0	4	0	2.30259	no-growth	no	no
Grootpan	EC98	pssp	Dead	20	NA	0	1.1	2	0.6-1.1	nd	NA	5	NA	NA	NA	no	no
Grootpan	EC99	pssp	Alive	0	0.3	1	NA	NA	NA	nd	NA	NA	NA	NA	NA	no	no
Grootpan	EC99	pssp	Alive	6	0.3	1	0.3	1	< 0.6	0	0	6	0	2.30259	no-growth	no	no
Grootpan	EC99	pssp	Dead	11	NA	0	0.3	1	< 0.6	nd	NA	5	NA	NA	NA	no	no
Europa	EU1	esp	Alive	0	0.3	1	NA	NA	NA	nd	NA	NA	NA	NA	NA	no	no
Europa	EU1	esp	Alive	6	0.7	2	0.3	1	< 0.6	1	0.4	6	0.4	2.34181	growth	no	no
Europa	EU1	esp	Alive	11	2	3	0.7	2	0.6-1.1	1	1.3	5	1.56	2.44755	growth	no	no
Europa	EU1	esp	Dead	15	NA	0	2	3	1.2-2	nd	NA	4	NA	NA	NA	no	no
Europa	EU10	pssp	Alive	0	3.2	4	NA	NA	NA	nd	NA	NA	NA	NA	NA	no	yes
Europa	EU10	pssp	Alive	6	7.8	5	3.2	4	2.1-5	1	4.6	6	4.6	2.68102	growth	no	yes
Europa	EU10	pssp	Alive	11	8.4	5	7.8	#N/A	> 5	#N/A	0.6	5	0.72	2.37211	growth	no	yes
Europa	EU10	pssp	Alive	15	9.9	5	8.4	#N/A	> 5	#N/A	1.5	4	2.25	2.50553	growth	no	yes
Europa	EU10	pssp	Alive	20	10.7	5	9.9	#N/A	> 5	#N/A	0.8	5	0.96	2.39425	growth	no	yes
Europa	EU10	pssp	Alive	23	2.9	4	10.7	5	> 5	-1	-7.8	3	-15.6		shrink	yes	yes
Europa	EU10	pssp	missing	31	NA	NA	NA	NA	NA	nd	NA	8	NA	NA	NA	yes	yes
Europa	EU10	pssp	Alive	36	1.2	3	2.9	4	2.1-5	-1	-1.7	13	-0.784615	2.22087	shrink	yes	yes
Europa	EU102	esp	Alive	0	2.7	4	NA	NA	NA	nd	NA	NA	NA	NA	NA	no	no
Europa	EU102	esp	Alive	6	2.7	4	2.7	4	2.1-5	0	0	6	0	2.30259	no-growth	no	no
Europa	EU102	esp	Alive	11	4	4	2.7	4	2.1-5	0	1.3	5	1.56	2.44755	growth	no	no
Europa	EU102	esp	missing	15	NA	NA	4	4	2.1-5	nd	NA	4	NA	NA	NA	no	no
Europa	EU103	pssp	Alive	0	0.4	1	NA	NA	NA	nd	NA	NA	NA	NA	NA	no	no
Europa	EU103	pssp	Alive	6	0.8	2	0.4	1	< 0.6	1	0.4	6	0.4	2.34181	growth	no	no
Europa	EU103	pssp	Dead	11	NA	0	0.8	2	0.6-1.1	nd	NA	5	NA	NA	NA	no	no
Europa	EU104	pssp	Alive	0	1.8	3	NA	NA	NA	nd	NA	NA	NA	NA	NA	no	yes
Europa	EU104	pssp	Alive	6	4.9	4	1.8	3	1.2-2	1	3.1	6	3.1	2.57261	growth	no	yes
Europa	EU104	pssp	Alive	11	3.5	4	4.9	4	2.1-5	0	-1.4	5	-1.68	2.11866	shrink	yes	yes
Europa	EU104	pssp	missing	15	NA	NA	3.5	4	2.1-5	nd	NA	4	NA	NA	NA	yes	yes
Europa	EU106	pssp	Alive	0	2	3	NA	NA	NA	nd	NA	NA	NA	NA	NA	no	no
Europa	EU106	pssp	Dead	6	NA	0	2	3	1.2-2	nd	NA	6	NA	NA	NA	no	no
Europa	EU107	pssp	Alive	0	0.5	1	NA	NA	NA	nd	NA	NA	NA	NA	NA	no	no
Europa	EU107	pssp	Alive	6	0.9	2	0.5	1	< 0.6	1	0.4	6	0.4	2.34181	growth	no	no
Europa	EU107	pssp	Alive	11	0.9	2	0.9	2	0.6-1.1	0	0	5	0	2.30259	no-growth	no	no
Europa	EU107	pssp	missing	15	NA	NA	0.9	2	0.6-1.1	nd	NA	4	NA	NA	NA	no	no
Europa	EU108	esp	Alive	0	1.3	3	NA	NA	NA	nd	NA	NA	NA	NA	NA	no	no
Europa	EU108	esp	Alive	6	2.7	4	1.3	3	1.2-2	1	1.4	6	1.4	2.43361	growth	no	no
Europa	EU108	esp	Alive	11	3.3	4	2.7	4	2.1-5	0	0.6	5	0.72	2.37211	growth	no	no
Europa	EU108	esp	missing	15	NA	NA	3.3	4	2.1-5	nd	NA	4	NA	NA	NA	no	no
Europa	EU109	pssp	Alive	0	2.2	4	NA	NA	NA	nd	NA	NA	NA	NA	NA	no	yes
Europa	EU109	pssp	Alive	6	3	4	2.2	4	2.1-5	0	0.8	6	0.8	2.37955	growth	no	yes
Europa	EU109	pssp	Alive	11	0.6	2	3	4	2.1-5	-2	-2.4	5	-2.88	1.96291	shrink	yes	yes
Europa	EU109	pssp	missing	15	NA	NA	0.6	2	0.6-1.1	nd	NA	4	NA	NA	NA	yes	yes
Europa	EU11	esp	Alive	0	1.2	3	NA	NA	NA	nd	NA	NA	NA	NA	NA	no	yes
Europa	EU11	esp	Alive	6	3.1	4	1.2	3	1.2-2	1	1.9	6	1.9	2.47654	growth	no	yes
Europa	EU11	esp	Alive	11	5.7	5	3.1	4	2.1-5	1	2.6	5	3.12	2.57414	growth	no	yes
Europa	EU11	esp	Alive	15	0.4	1	5.7	5	> 5	-4	-5.3	4	-7.95	0.71784	shrink	yes	yes
Europa	EU11	esp	Dead	20	NA	0	0.4	1	< 0.6	nd	NA	5	NA	NA	NA	yes	yes
Europa	EU111	pssp	Alive	0	1.8	3	NA	NA	NA	nd	NA	NA	NA	NA	NA	no	no
Europa	EU111	pssp	Dead	6	NA	0	1.8	3	1.2-2	nd	NA	6	NA	NA	NA	no	no
Europa	EU112	pssp	Alive	0	1.1	2	NA	NA	NA	nd	NA	NA	NA	NA	NA	no	yes
Europa	EU112	pssp	Alive	6	0.9	2	1.1	2	0.6-1.1	0	-0.2	6	-0.2	2.28238	shrink	yes	yes
Europa	EU112	pssp	Dead	11	NA	0	0.9	2	0.6-1.1	nd	NA	5	NA	NA	NA	yes	yes
Europa	EU113	esp	Alive	0	1.7	3	NA	NA	NA	nd	NA	NA	NA	NA	NA	no	no
Europa	EU113	esp	Dead	6	NA	0	1.7	3	1.2-2	nd	NA	6	NA	NA	NA	no	no
Europa	EU114	pssp	Alive	0	0.6	2	NA	NA	NA	nd	NA	NA	NA	NA	NA	no	no
Europa	EU114	pssp	Dead	6	NA	0	0.6	2	0.6-1.1	nd	NA	6	NA	NA	NA	no	no
Europa	EU115	pssp	Alive	0	0.8	2	NA	NA	NA	nd	NA	NA	NA	NA	NA	no	no
Europa	EU115	pssp	Dead	6	NA	0	0.8	2	0.6-1.1	nd	NA	6	NA	NA	NA	no	no
Europa	EU116	esp	Alive	0	0.5	1	NA	NA	NA	nd	NA	NA	NA	NA	NA	no	yes
Europa	EU116	esp	Alive	6	2.5	4	0.5	1	< 0.6	3	2	6	2	2.48491	growth	no	yes
Europa	EU116	esp	Alive	11	0.4	1	2.5	4	2.1-5	-3	-2.1	5	-2.52	2.01223	shrink	yes	yes
Europa	EU116	esp	Alive	15	0.4	1	0.4	1	< 0.6	0	0	4	0	2.30259	no-growth	yes	yes
Europa	EU116	esp	missing	20	NA	NA	NA	NA	NA	nd	NA	5	NA	NA	NA	yes	yes
Europa	EU116	esp	Alive	23	0.5	1	0.4	1	< 0.6	0	0.1	8	0.075	2.31006	growth	yes	yes
Europa	EU116	esp	Alive	31	1.1	2	0.5	1	< 0.6	1	0.6	8	0.45	2.3466	growth	yes	yes
Europa	EU116	esp	Dead	36	NA	0	1.1	2	0.6-1.1	nd	NA	5	NA	NA	NA	yes	yes
Europa	EU117	esp	Alive	0	1.2	3	NA	NA	NA	nd	NA	NA	NA	NA	NA	no	yes
Europa	EU117	esp	missing	6	NA	NA	NA	NA	NA	nd	NA	6	NA	NA	NA	no	yes
Europa	EU117	esp	Alive	11	1.3	3	1.2	3	1.2-2	0	0.1	11	0.0545455	2.30802	growth	no	yes
Europa	EU117	esp	Alive	15	1.2	3	1.3	3	1.2-2	0	-0.1	4	-0.15	2.28747	shrink	yes	yes
Europa	EU117	esp	Dead	20	NA	0	1.2	3	1.2-2	nd	NA	5	NA	NA	NA	yes	yes
Europa	EU119	pssp	Alive	0	1.1	2	NA	NA	NA	nd	NA	NA	NA	NA	NA	no	no
Europa	EU119	pssp	Dead	6	NA	0	1.1	2	0.6-1.1	nd	NA	6	NA	NA	NA	no	no
Europa	EU120	esp	Alive	0	0.5	1	NA	NA	NA	nd	NA	NA	NA	NA	NA	no	yes
Europa	EU120	esp	Alive	6	1.2	3	0.5	1	< 0.6	2	0.7	6	0.7	2.37024	growth	no	yes
Europa	EU120	esp	Alive	11	0.8	2	1.2	3	1.2-2	-1	-0.4	5	-0.48	2.25339	shrink	yes	yes
Europa	EU120	esp	Dead	15	NA	0	0.8	2	0.6-1.1	nd	NA	4	NA	NA	NA	yes	yes
Europa	EU121	esp	Alive	0	2.5	4	NA	NA	NA	nd	NA	NA	NA	NA	NA	no	yes
Europa	EU121	esp	Alive	6	4.5	4	2.5	4	2.1-5	0	2	6	2	2.48491	growth	no	yes
Europa	EU121	esp	Alive	11	4.5	4	4.5	4	2.1-5	0	0	5	0	2.30259	no-growth	no	yes
Europa	EU121	esp	Alive	15	3.3	4	4.5	4	2.1-5	0	-1.2	4	-1.8	2.10413	shrink	yes	yes
Europa	EU121	esp	Alive	20	4.7	4	3.3	4	2.1-5	0	1.4	5	1.68	2.45788	growth	yes	yes
Europa	EU121	esp	Alive	23	3.6	4	4.7	4	2.1-5	0	-1.1	3	-2.2	2.05412	shrink	yes	yes
Europa	EU121	esp	Alive	31	2.2	4	3.6	4	2.1-5	0	-1.4	8	-1.05	2.19165	shrink	yes	yes
Europa	EU121	esp	Dead	36	NA	0	2.2	4	2.1-5	nd	NA	5	NA	NA	NA	yes	yes
Europa	EU122	esp	Alive	0	2.2	4	NA	NA	NA	nd	NA	NA	NA	NA	NA	no	yes
Europa	EU122	esp	Alive	6	3.5	4	2.2	4	2.1-5	0	1.3	6	1.3	2.4248	growth	no	yes
Europa	EU122	esp	Alive	11	4.3	4	3.5	4	2.1-5	0	0.8	5	0.96	2.39425	growth	no	yes
Europa	EU122	esp	Alive	15	6.4	5	4.3	4	2.1-5	1	2.1	4	3.15	2.57642	growth	no	yes
Europa	EU122	esp	Alive	20	3.2	4	6.4	5	> 5	-1	-3.2	5	-3.84	1.81808	shrink	yes	yes
Europa	EU122	esp	Alive	23	3.2	4	3.2	4	2.1-5	0	0	3	0	2.30259	no-growth	yes	yes
Europa	EU122	esp	Alive	31	4.2	4	3.2	4	2.1-5	0	1	8	0.75	2.37491	growth	yes	yes
Europa	EU122	esp	Alive	36	5.3	5	4.2	4	2.1-5	1	1.1	5	1.32	2.42657	growth	yes	yes
Europa	EU123	esp	Alive	0	1.2	3	NA	NA	NA	nd	NA	NA	NA	NA	NA	no	yes
Europa	EU123	esp	Alive	6	1.4	3	1.2	3	1.2-2	0	0.2	6	0.2	2.32239	growth	no	yes
Europa	EU123	esp	Alive	11	1.8	3	1.4	3	1.2-2	0	0.4	5	0.48	2.34947	growth	no	yes
Europa	EU123	esp	Alive	15	1.5	3	1.8	3	1.2-2	0	-0.3	4	-0.45	2.25654	shrink	yes	yes
Europa	EU123	esp	Dead	20	NA	0	1.5	3	1.2-2	nd	NA	5	NA	NA	NA	yes	yes
Europa	EU124	pssp	Alive	0	1.7	3	NA	NA	NA	nd	NA	NA	NA	NA	NA	no	no
Europa	EU124	pssp	Dead	6	NA	0	1.7	3	1.2-2	nd	NA	6	NA	NA	NA	no	no
Europa	EU125	esp	Alive	0	2.5	4	NA	NA	NA	nd	NA	NA	NA	NA	NA	no	no
Europa	EU125	esp	Dead	6	NA	0	2.5	4	2.1-5	nd	NA	6	NA	NA	NA	no	no
Europa	EU126	pssp	Alive	0	0.6	2	NA	NA	NA	nd	NA	NA	NA	NA	NA	no	no
Europa	EU126	pssp	Alive	6	0.9	2	0.6	2	0.6-1.1	0	0.3	6	0.3	2.33214	growth	no	no
Europa	EU126	pssp	Dead	11	NA	0	0.9	2	0.6-1.1	nd	NA	5	NA	NA	NA	no	no
Europa	EU128	esp	Alive	0	2	3	NA	NA	NA	nd	NA	NA	NA	NA	NA	no	no
Europa	EU128	esp	Alive	6	3.2	4	2	3	1.2-2	1	1.2	6	1.2	2.41591	growth	no	yes
Europa	EU128	esp	Alive	11	4.6	4	3.2	4	2.1-5	0	1.4	5	1.68	2.45788	growth	no	yes
Europa	EU128	esp	Alive	15	1.3	3	4.6	4	2.1-5	-1	-3.3	4	-4.95	1.61939	shrink	yes	yes
Europa	EU128	esp	Alive	20	1.8	3	1.3	3	1.2-2	0	0.5	5	0.6	2.36085	growth	yes	yes
Europa	EU128	esp	Alive	23	2.7	4	1.8	3	1.2-2	1	0.9	3	1.8	2.4681	growth	yes	yes
Europa	EU128	esp	Alive	31	2.4	4	2.7	4	2.1-5	0	-0.3	8	-0.225	2.27983	shrink	yes	yes
Europa	EU128	esp	Alive	36	3.5	4	2.4	4	2.1-5	0	1.1	5	1.32	2.42657	growth	yes	yes
Europa	EU129	pssp	Alive	0	1.1	2	NA	NA	NA	nd	NA	NA	NA	NA	NA	no	yes
Europa	EU129	pssp	missing	6	NA	NA	1.1	2	0.6-1.1	nd	NA	6	NA	NA	NA	no	yes
Europa	EU129	pssp	Alive	11	0.4	1	1.1	2	0.6-1.1	-1	-0.7	11	-0.381818	2.26366	shrink	yes	yes
Europa	EU130	pssp	Alive	0	0.6	2	NA	NA	NA	nd	NA	NA	NA	NA	NA	no	no
Europa	EU130	pssp	missing	6	NA	NA	NA	NA	NA	nd	NA	6	NA	NA	NA	no	no
Europa	EU130	pssp	Alive	11	0.6	2	0.6	2	0.6-1.1	0	0	11	0	2.30259	no-growth	no	yes
Europa	EU130	pssp	Alive	15	1.1	2	0.6	2	0.6-1.1	0	0.5	4	0.75	2.37491	growth	no	yes
Europa	EU130	pssp	Alive	20	1.7	3	1.1	2	0.6-1.1	1	0.6	5	0.72	2.37211	growth	no	yes
Europa	EU130	pssp	Alive	23	3.6	4	1.7	3	1.2-2	1	1.9	3	3.8	2.62467	growth	no	yes
Europa	EU130	pssp	Alive	31	1	2	3.6	4	2.1-5	-2	-2.6	8	-1.95	2.08567	shrink	yes	yes
Europa	EU130	pssp	Dead	36	NA	0	1	2	0.6-1.1	nd	NA	5	NA	NA	NA	yes	yes
Europa	EU131	pssp	Alive	0	2.2	4	NA	NA	NA	nd	NA	NA	NA	NA	NA	no	no
Europa	EU131	pssp	Dead	6	NA	0	2.2	4	2.1-5	nd	NA	6	NA	NA	NA	no	no
Europa	EU132	pssp	Alive	0	1.1	2	NA	NA	NA	nd	NA	NA	NA	NA	NA	no	no
Europa	EU132	pssp	Dead	6	NA	0	1.1	2	0.6-1.1	nd	NA	6	NA	NA	NA	no	no
Europa	EU133	pssp	Alive	0	1.7	3	NA	NA	NA	nd	NA	NA	NA	NA	NA	no	yes
Europa	EU133	pssp	missing	6	NA	NA	NA	NA	NA	nd	NA	6	NA	NA	NA	no	yes
Europa	EU133	pssp	Alive	11	0.8	2	1.7	3	1.2-2	-1	-0.9	11	-0.490909	2.25225	shrink	yes	yes
Europa	EU133	pssp	Alive	15	2.5	4	0.8	2	0.6-1.1	2	1.7	4	2.55	2.52972	growth	yes	yes
Europa	EU133	pssp	Alive	20	2.2	4	2.5	4	2.1-5	0	-0.3	5	-0.36	2.26592	shrink	yes	yes
Europa	EU133	pssp	Alive	23	2.4	4	2.2	4	2.1-5	0	0.2	3	0.4	2.34181	growth	yes	yes
Europa	EU133	pssp	missing	31	NA	NA	NA	NA	NA	nd	NA	8	NA	NA	NA	yes	yes
Europa	EU133	pssp	Alive	36	2.7	4	2.4	4	2.1-5	0	0.3	13	0.138462	2.31634	growth	yes	yes
Europa	EU134	pssp	Alive	0	1.6	3	NA	NA	NA	nd	NA	NA	NA	NA	NA	no	yes
Europa	EU134	pssp	Alive	6	0.4	1	1.6	3	1.2-2	-2	-1.2	6	-1.2	2.17475	shrink	yes	yes
Europa	EU134	pssp	Dead	11	NA	0	0.4	1	< 0.6	nd	NA	5	NA	NA	NA	yes	yes
Europa	EU135	esp	Alive	0	1.7	3	NA	NA	NA	nd	NA	NA	NA	NA	NA	no	no
Europa	EU135	esp	Dead	6	NA	0	1.7	3	1.2-2	nd	NA	6	NA	NA	NA	no	no
Europa	EU136	esp	Alive	0	1.7	3	NA	NA	NA	nd	NA	NA	NA	NA	NA	no	no
Europa	EU136	esp	Dead	6	NA	0	1.7	3	1.2-2	nd	NA	6	NA	NA	NA	no	no
Europa	EU138	esp	Alive	0	1.5	3	NA	NA	NA	nd	NA	NA	NA	NA	NA	no	yes
Europa	EU138	esp	Alive	6	0.7	2	1.5	3	1.2-2	-1	-0.8	6	-0.8	2.2192	shrink	yes	yes
Europa	EU138	esp	Alive	11	1.3	3	0.7	2	0.6-1.1	1	0.6	5	0.72	2.37211	growth	yes	yes
Europa	EU138	esp	Alive	15	1.9	3	1.3	3	1.2-2	0	0.6	4	0.9	2.38876	growth	yes	yes
Europa	EU138	esp	Alive	20	1.6	3	1.9	3	1.2-2	0	-0.3	5	-0.36	2.26592	shrink	yes	yes
Europa	EU138	esp	Dead	23	NA	0	1.6	3	1.2-2	nd	NA	3	NA	NA	NA	yes	yes
Europa	EU139	esp	Alive	0	1.2	3	NA	NA	NA	nd	NA	NA	NA	NA	NA	no	no
Europa	EU139	esp	Dead	6	NA	0	1.2	3	1.2-2	nd	NA	6	NA	NA	NA	no	no
Europa	EU14	pssp	Alive	0	3.7	4	NA	NA	NA	nd	NA	NA	NA	NA	NA	no	no
Europa	EU14	pssp	Dead	6	NA	0	3.7	4	2.1-5	nd	NA	6	NA	NA	NA	no	no
Europa	EU140	pssp	Alive	0	0.7	2	NA	NA	NA	nd	NA	NA	NA	NA	NA	no	no
Europa	EU140	pssp	Dead	6	NA	0	0.7	2	0.6-1.1	nd	NA	6	NA	NA	NA	no	no
Europa	EU142	esp	Alive	0	1.3	3	NA	NA	NA	nd	NA	NA	NA	NA	NA	no	no
Europa	EU142	esp	Dead	6	NA	0	1.3	3	1.2-2	nd	NA	6	NA	NA	NA	no	no
Europa	EU143	esp	Alive	0	0.6	2	NA	NA	NA	nd	NA	NA	NA	NA	NA	no	no
Europa	EU143	esp	Dead	6	NA	0	0.6	2	0.6-1.1	nd	NA	6	NA	NA	NA	no	no
Europa	EU144	esp	Alive	0	2.1	4	NA	NA	NA	nd	NA	NA	NA	NA	NA	no	no
Europa	EU144	esp	Alive	6	2.5	4	2.1	4	2.1-5	0	0.4	6	0.4	2.34181	growth	no	no
Europa	EU144	esp	Dead	11	NA	0	2.5	4	2.1-5	nd	NA	5	NA	NA	NA	no	no
Europa	EU145	pssp	Alive	0	1	2	NA	NA	NA	nd	NA	NA	NA	NA	NA	no	no
Europa	EU145	pssp	Alive	6	1.1	2	1	2	0.6-1.1	0	0.1	6	0.1	2.31254	growth	no	no
Europa	EU145	pssp	Alive	11	1.3	3	1.1	2	0.6-1.1	1	0.2	5	0.24	2.3263	growth	no	no
Europa	EU145	pssp	missing	15	NA	NA	1.3	3	1.2-2	nd	NA	4	NA	NA	NA	no	no
Europa	EU147	pssp	Alive	0	1.2	3	NA	NA	NA	nd	NA	NA	NA	NA	NA	no	no
Europa	EU147	pssp	Alive	6	2	3	1.2	3	1.2-2	0	0.8	6	0.8	2.37955	growth	no	no
Europa	EU147	pssp	Dead	11	NA	0	2	3	1.2-2	nd	NA	5	NA	NA	NA	no	no
Europa	EU150	pssp	Alive	0	1.7	3	NA	NA	NA	nd	NA	NA	NA	NA	NA	no	yes
Europa	EU150	pssp	missing	6	NA	NA	NA	NA	NA	nd	NA	6	NA	NA	NA	no	yes
Europa	EU150	pssp	Alive	11	0.8	2	1.7	3	1.2-2	-1	-0.9	11	-0.490909	2.25225	shrink	yes	yes
Europa	EU150	pssp	Alive	15	0.4	1	0.8	2	0.6-1.1	-1	-0.4	4	-0.6	2.24071	shrink	yes	yes
Europa	EU150	pssp	Dead	20	NA	0	0.4	1	< 0.6	nd	NA	5	NA	NA	NA	yes	yes
Europa	EU151	esp	Alive	0	0.8	2	NA	NA	NA	nd	NA	NA	NA	NA	NA	no	yes
Europa	EU151	esp	missing	6	NA	NA	NA	NA	NA	nd	NA	6	NA	NA	NA	no	yes
Europa	EU151	esp	Alive	11	2.9	4	0.8	2	0.6-1.1	2	2.1	11	1.14545	2.41103	growth	no	yes
Europa	EU151	esp	Alive	15	2.9	4	2.9	4	2.1-5	0	0	4	0	2.30259	no-growth	no	yes
Europa	EU151	esp	missing	20	NA	NA	NA	NA	NA	nd	NA	5	NA	NA	NA	no	yes
Europa	EU151	esp	Alive	23	1.3	3	2.9	4	2.1-5	-1	-1.6	8	-1.2	2.17475	shrink	yes	yes
Europa	EU151	esp	Alive	31	1.8	3	1.3	3	1.2-2	0	0.5	8	0.375	2.3394	growth	yes	yes
Europa	EU151	esp	Alive	36	1	2	1.8	3	1.2-2	-1	-0.8	5	-0.96	2.20166	shrink	yes	yes
Europa	EU152	esp	Alive	0	2	3	NA	NA	NA	nd	NA	NA	NA	NA	NA	no	yes
Europa	EU152	esp	Alive	6	2.8	4	2	3	1.2-2	1	0.8	6	0.8	2.37955	growth	no	yes
Europa	EU152	esp	Alive	11	3.3	4	2.8	4	2.1-5	0	0.5	5	0.6	2.36085	growth	no	yes
Europa	EU152	esp	Alive	15	5.2	5	3.3	4	2.1-5	1	1.9	4	2.85	2.55334	growth	no	yes
Europa	EU152	esp	Alive	20	0.5	1	5.2	5	> 5	-4	-4.7	5	-5.64	1.47247	shrink	yes	yes
Europa	EU152	esp	Alive	23	1.3	3	0.5	1	< 0.6	2	0.8	3	1.6	2.45101	growth	yes	yes
Europa	EU152	esp	Alive	31	1.2	3	1.3	3	1.2-2	0	-0.1	8	-0.075	2.29506	shrink	yes	yes
Europa	EU152	esp	Dead	36	NA	0	1.2	3	1.2-2	nd	NA	5	NA	NA	NA	yes	yes
Europa	EU153	pssp	Alive	0	0.5	1	NA	NA	NA	nd	NA	NA	NA	NA	NA	no	yes
Europa	EU153	pssp	Alive	6	1.2	3	0.5	1	< 0.6	2	0.7	6	0.7	2.37024	growth	no	yes
Europa	EU153	pssp	Alive	11	0.5	1	1.2	3	1.2-2	-2	-0.7	5	-0.84	2.21485	shrink	yes	yes
Europa	EU153	pssp	Alive	15	0.9	2	0.5	1	< 0.6	1	0.4	4	0.6	2.36085	growth	yes	yes
Europa	EU153	pssp	Alive	20	0.7	2	0.9	2	0.6-1.1	0	-0.2	5	-0.24	2.27829	shrink	yes	yes
Europa	EU153	pssp	Alive	23	0.5	1	0.7	2	0.6-1.1	-1	-0.2	3	-0.4	2.26176	shrink	yes	yes
Europa	EU153	pssp	Dead	31	NA	0	0.5	1	< 0.6	nd	NA	8	NA	NA	NA	yes	yes
Europa	EU156	pssp	Alive	0	0.5	1	NA	NA	NA	nd	NA	NA	NA	NA	NA	no	yes
Europa	EU156	pssp	missing	6	NA	NA	NA	NA	NA	nd	NA	6	NA	NA	NA	no	yes
Europa	EU156	pssp	Alive	11	1.4	3	0.5	1	< 0.6	2	0.9	11	0.490909	2.35051	growth	no	yes
Europa	EU156	pssp	Alive	15	2.1	4	1.4	3	1.2-2	1	0.7	4	1.05	2.40243	growth	no	yes
Europa	EU156	pssp	Alive	20	3.6	4	2.1	4	2.1-5	0	1.5	5	1.8	2.4681	growth	no	yes
Europa	EU156	pssp	Alive	23	0.5	1	3.6	4	2.1-5	-3	-3.1	3	-6.2	1.335	shrink	yes	yes
Europa	EU156	pssp	Alive	31	0.7	2	0.5	1	< 0.6	1	0.2	8	0.15	2.31747	growth	yes	yes
Europa	EU156	pssp	Dead	36	NA	0	0.7	2	0.6-1.1	nd	NA	5	NA	NA	NA	yes	yes
Europa	EU157	pssp	Alive	0	0.3	1	NA	NA	NA	nd	NA	NA	NA	NA	NA	no	yes
Europa	EU157	pssp	Alive	6	1.1	2	0.3	1	< 0.6	1	0.8	6	0.8	2.37955	growth	no	yes
Europa	EU157	pssp	Alive	11	0.8	2	1.1	2	0.6-1.1	0	-0.3	5	-0.36	2.26592	shrink	yes	yes
Europa	EU157	pssp	Alive	15	0.8	2	0.8	2	0.6-1.1	0	0	4	0	2.30259	no-growth	yes	yes
Europa	EU157	pssp	Dead	20	NA	0	0.8	2	0.6-1.1	nd	NA	5	NA	NA	NA	yes	yes
Europa	EU160	esp	Alive	0	0.5	1	NA	NA	NA	nd	NA	NA	NA	NA	NA	no	no
Europa	EU160	esp	missing	6	NA	NA	0.5	1	< 0.6	nd	NA	6	NA	NA	NA	no	no
Europa	EU161	esp	Alive	0	1.6	3	NA	NA	NA	nd	NA	NA	NA	NA	NA	no	yes
Europa	EU161	esp	Alive	6	3.7	4	1.6	3	1.2-2	1	2.1	6	2.1	2.49321	growth	no	yes
Europa	EU161	esp	Alive	11	4.6	4	3.7	4	2.1-5	0	0.9	5	1.08	2.40514	growth	no	yes
Europa	EU161	esp	Alive	15	4.6	4	4.6	4	2.1-5	0	0	4	0	2.30259	no-growth	no	yes
Europa	EU161	esp	Alive	20	2.5	4	4.6	4	2.1-5	0	-2.1	5	-2.52	2.01223	shrink	yes	yes
Europa	EU161	esp	Alive	23	2.6	4	2.5	4	2.1-5	0	0.1	3	0.2	2.32239	growth	yes	yes
Europa	EU161	esp	Alive	31	2.7	4	2.6	4	2.1-5	0	0.1	8	0.075	2.31006	growth	yes	yes
Europa	EU161	esp	Alive	36	3.2	4	2.7	4	2.1-5	0	0.5	5	0.6	2.36085	growth	yes	yes
Europa	EU162	esp	Alive	0	1.8	3	NA	NA	NA	nd	NA	NA	NA	NA	NA	no	yes
Europa	EU162	esp	missing	6	NA	NA	NA	NA	NA	nd	NA	6	NA	NA	NA	no	yes
Europa	EU162	esp	Alive	11	0.8	2	1.8	3	1.2-2	-1	-1	11	-0.545455	2.2465	shrink	yes	yes
Europa	EU162	esp	Alive	15	2	3	0.8	2	0.6-1.1	1	1.2	4	1.8	2.4681	growth	yes	yes
Europa	EU162	esp	Alive	20	0.2	1	2	3	1.2-2	-2	-1.9	5	-2.28	2.04381	shrink	yes	yes
Europa	EU162	esp	Alive	23	0.6	2	0.3	1	< 0.6	1	0.5	3	1	2.3979	growth	yes	yes
Europa	EU162	esp	Dead	31	NA	0	0.6	2	0.6-1.1	nd	NA	8	NA	NA	NA	yes	yes
Europa	EU163	esp	Alive	0	0.6	2	NA	NA	NA	nd	NA	NA	NA	NA	NA	no	yes
Europa	EU163	esp	missing	6	NA	NA	NA	NA	NA	nd	NA	6	NA	NA	NA	no	yes
Europa	EU163	esp	Alive	11	0.9	2	0.6	2	0.6-1.1	0	0.3	11	0.163636	2.31882	growth	no	yes
Europa	EU163	esp	Alive	15	0.5	1	0.9	2	0.6-1.1	-1	-0.4	4	-0.6	2.24071	shrink	yes	yes
Europa	EU163	esp	Dead	20	NA	0	0.5	1	< 0.6	nd	NA	5	NA	NA	NA	yes	yes
Europa	EU164	esp	Alive	0	0.5	1	NA	NA	NA	nd	NA	NA	NA	NA	NA	no	no
Europa	EU164	esp	missing	6	NA	NA	NA	NA	NA	nd	NA	6	NA	NA	NA	no	no
Europa	EU164	esp	Alive	11	0.9	2	0.5	1	< 0.6	1	0.4	11	0.218182	2.32417	growth	no	no
Europa	EU164	esp	Dead	15	NA	0	0.9	2	0.6-1.1	nd	NA	4	NA	NA	NA	no	no
Europa	EU167	esp	Alive	0	1.2	3	NA	NA	NA	nd	NA	NA	NA	NA	NA	no	yes
Europa	EU167	esp	missing	6	NA	NA	NA	NA	NA	nd	NA	6	NA	NA	NA	no	yes
Europa	EU167	esp	Alive	11	0.9	2	1.2	3	1.2-2	-1	-0.3	11	-0.163636	2.28609	shrink	yes	yes
Europa	EU167	esp	Dead	15	NA	0	0.9	2	0.6-1.1	nd	NA	4	NA	NA	NA	yes	yes
Europa	EU168	esp	Alive	0	0.3	1	NA	NA	NA	nd	NA	NA	NA	NA	NA	no	no
Europa	EU168	esp	Alive	6	0.6	2	0.3	1	< 0.6	1	0.3	6	0.3	2.33214	growth	no	no
Europa	EU168	esp	Dead	11	NA	0	0.6	2	0.6-1.1	nd	NA	5	NA	NA	NA	no	no
Europa	EU169	pssp	Alive	0	0.7	2	NA	NA	NA	nd	NA	NA	NA	NA	NA	no	yes
Europa	EU169	pssp	Alive	6	2.3	4	0.7	2	0.6-1.1	2	1.6	6	1.6	2.45101	growth	no	yes
Europa	EU169	pssp	Alive	11	0.5	1	2.3	4	2.1-5	-3	-1.8	5	-2.16	2.05924	shrink	yes	yes
Europa	EU169	pssp	Alive	15	0.5	1	0.5	1	< 0.6	0	0	4	0	2.30259	no-growth	yes	yes
Europa	EU169	pssp	Alive	20	0.9	2	0.5	1	< 0.6	1	0.4	5	0.48	2.34947	growth	yes	yes
Europa	EU169	pssp	Dead	23	NA	0	0.9	2	0.6-1.1	nd	NA	3	NA	NA	NA	yes	yes
Europa	EU17	pssp	Alive	0	0.9	2	NA	NA	NA	nd	NA	NA	NA	NA	NA	no	no
Europa	EU17	pssp	Alive	6	1.4	3	0.9	2	0.6-1.1	1	0.5	6	0.5	2.35138	growth	no	no
Europa	EU17	pssp	Alive	11	1.4	3	1.4	3	1.2-2	0	0	5	0	2.30259	no-growth	no	no
Europa	EU17	pssp	Dead	15	NA	0	1.4	3	1.2-2	nd	NA	4	NA	NA	NA	no	no
Europa	EU170	esp	Alive	0	1.1	2	NA	NA	NA	nd	NA	NA	NA	NA	NA	no	no
Europa	EU170	esp	missing	6	NA	NA	NA	NA	NA	nd	NA	6	NA	NA	NA	no	no
Europa	EU170	esp	Alive	11	1.2	3	1.1	2	0.6-1.1	1	0.1	11	0.0545455	2.30802	growth	no	no
Europa	EU170	esp	Dead	15	NA	0	1.2	3	1.2-2	nd	NA	4	NA	NA	NA	no	no
Europa	EU171	esp	Alive	0	1.1	2	NA	NA	NA	nd	NA	NA	NA	NA	NA	no	no
Europa	EU171	esp	Dead	6	NA	0	1.1	2	0.6-1.1	nd	NA	6	NA	NA	NA	no	no
Europa	EU172	pssp	Alive	0	2.8	4	NA	NA	NA	nd	NA	NA	NA	NA	NA	no	yes
Europa	EU172	pssp	Alive	6	2.8	4	2.8	4	2.1-5	0	0	6	0	2.30259	no-growth	no	yes
Europa	EU172	pssp	Alive	11	1.2	3	2.8	4	2.1-5	-1	-1.6	5	-1.92	2.08939	shrink	yes	yes
Europa	EU172	pssp	Dead	15	NA	0	1.2	3	1.2-2	nd	NA	4	NA	NA	NA	yes	yes
Europa	EU173	pssp	Alive	0	0.3	1	NA	NA	NA	nd	NA	NA	NA	NA	NA	no	no
Europa	EU173	pssp	Alive	6	0.9	2	0.3	1	< 0.6	1	0.6	6	0.6	2.36085	growth	no	no
Europa	EU173	pssp	Alive	11	1	2	0.9	2	0.6-1.1	0	0.1	5	0.12	2.31451	growth	no	no
Europa	EU173	pssp	Dead	15	NA	0	1	2	0.6-1.1	nd	NA	4	NA	NA	NA	no	no
Europa	EU175	esp	Alive	0	2.1	4	NA	NA	NA	nd	NA	NA	NA	NA	NA	no	no
Europa	EU175	esp	Dead	6	NA	0	2.1	4	2.1-5	nd	NA	6	NA	NA	NA	no	no
Europa	EU176	pssp	Alive	0	2	3	NA	NA	NA	nd	NA	NA	NA	NA	NA	no	no
Europa	EU176	pssp	Dead	6	NA	0	2	3	1.2-2	nd	NA	6	NA	NA	NA	no	no
Europa	EU177	esp	Alive	0	0.5	1	NA	NA	NA	nd	NA	NA	NA	NA	NA	no	yes
Europa	EU177	esp	Alive	6	0.8	2	0.5	1	< 0.6	1	0.3	6	0.3	2.33214	growth	no	yes
Europa	EU177	esp	Alive	11	1.2	3	0.8	2	0.6-1.1	1	0.4	5	0.48	2.34947	growth	no	yes
Europa	EU177	esp	Alive	15	1.2	3	1.2	3	1.2-2	0	0	4	0	2.30259	no-growth	no	yes
Europa	EU177	esp	Alive	20	0.6	2	1.2	3	1.2-2	-1	-0.6	5	-0.72	2.22786	shrink	yes	yes
Europa	EU177	esp	Alive	23	0.7	2	0.6	2	0.6-1.1	0	0.1	3	0.2	2.32239	growth	yes	yes
Europa	EU177	esp	Alive	31	0.9	2	0.7	2	0.6-1.1	0	0.2	8	0.15	2.31747	growth	yes	yes
Europa	EU177	esp	Alive	36	2	3	0.9	2	0.6-1.1	1	1.1	5	1.32	2.42657	growth	yes	yes
Europa	EU18	esp	Alive	0	2.3	4	NA	NA	NA	nd	NA	NA	NA	NA	NA	no	yes
Europa	EU18	esp	Alive	6	3	4	2.3	4	2.1-5	0	0.7	6	0.7	2.37024	growth	no	yes
Europa	EU18	esp	Alive	11	3.5	4	3	4	2.1-5	0	0.5	5	0.6	2.36085	growth	no	yes
Europa	EU18	esp	Alive	15	2.9	4	3.5	4	2.1-5	0	-0.6	4	-0.9	2.20827	shrink	yes	yes
Europa	EU18	esp	Alive	20	0.9	2	2.9	4	2.1-5	-2	-2	5	-2.4	2.02815	shrink	yes	yes
Europa	EU18	esp	Dead	23	NA	0	0.9	2	0.6-1.1	nd	NA	3	NA	NA	NA	yes	yes
Europa	EU180	esp	Alive	0	0.3	1	NA	NA	NA	nd	NA	NA	NA	NA	NA	no	yes
Europa	EU180	esp	Alive	6	0.3	1	0.3	1	< 0.6	0	0	6	0	2.30259	no-growth	no	yes
Europa	EU180	esp	Alive	11	0.9	2	0.3	1	< 0.6	1	0.6	5	0.72	2.37211	growth	no	yes
Europa	EU180	esp	Alive	15	0.5	1	0.9	2	0.6-1.1	-1	-0.4	4	-0.6	2.24071	shrink	yes	yes
Europa	EU180	esp	Alive	20	0.9	2	0.5	1	< 0.6	1	0.4	5	0.48	2.34947	growth	yes	yes
Europa	EU180	esp	Alive	23	1.2	3	0.9	2	0.6-1.1	1	0.3	3	0.6	2.36085	growth	yes	yes
Europa	EU180	esp	Alive	31	1.3	3	1.2	3	1.2-2	0	0.1	8	0.075	2.31006	growth	yes	yes
Europa	EU180	esp	Alive	36	1.1	2	1.3	3	1.2-2	-1	-0.2	5	-0.24	2.27829	shrink	yes	yes
Europa	EU181	pssp	Alive	0	2.4	4	NA	NA	NA	nd	NA	NA	NA	NA	NA	no	no
Europa	EU181	pssp	Alive	6	5.5	5	2.4	4	2.1-5	1	3.1	6	3.1	2.57261	growth	no	no
Europa	EU181	pssp	Dead	11	NA	0	5.5	5	> 5	nd	NA	5	NA	NA	NA	no	no
Europa	EU182	pssp	Alive	0	1.2	3	NA	NA	NA	nd	NA	NA	NA	NA	NA	no	no
Europa	EU182	pssp	Alive	6	3.6	4	1.2	3	1.2-2	1	2.4	6	2.4	2.5177	growth	no	no
Europa	EU182	pssp	Alive	11	5	4	3.6	4	2.1-5	0	1.4	5	1.68	2.45788	growth	no	no
Europa	EU182	pssp	Dead	15	NA	0	5	4	2.1-5	nd	NA	4	NA	NA	NA	no	no
Europa	EU183	pssp	Alive	0	2	3	NA	NA	NA	nd	NA	NA	NA	NA	NA	no	no
Europa	EU183	pssp	Alive	6	2.1	4	2	3	1.2-2	1	0.1	6	0.1	2.31254	growth	no	no
Europa	EU183	pssp	Dead	11	NA	0	2.1	4	2.1-5	nd	NA	5	NA	NA	NA	no	no
Europa	EU185	esp	Alive	0	2	3	NA	NA	NA	nd	NA	NA	NA	NA	NA	no	no
Europa	EU185	esp	missing	6	NA	NA	2	3	1.2-2	nd	NA	6	NA	NA	NA	no	no
Europa	EU186	pssp	Alive	0	1	2	NA	NA	NA	nd	NA	NA	NA	NA	NA	no	no
Europa	EU186	pssp	Alive	6	1.3	3	1	2	0.6-1.1	1	0.3	6	0.3	2.33214	growth	no	no
Europa	EU186	pssp	missing	11	NA	NA	1.3	3	1.2-2	nd	NA	5	NA	NA	NA	no	no
Europa	EU187	pssp	Alive	0	1.1	2	NA	NA	NA	nd	NA	NA	NA	NA	NA	no	no
Europa	EU187	pssp	Alive	6	1.2	3	1.1	2	0.6-1.1	1	0.1	6	0.1	2.31254	growth	no	no
Europa	EU187	pssp	Alive	11	1.5	3	1.2	3	1.2-2	0	0.3	5	0.36	2.33795	growth	no	no
Europa	EU187	pssp	Dead	15	NA	0	1.5	3	1.2-2	nd	NA	4	NA	NA	NA	no	no
Europa	EU188	pssp	Alive	0	1.5	3	NA	NA	NA	nd	NA	NA	NA	NA	NA	no	no
Europa	EU188	pssp	Dead	6	NA	0	1.5	3	1.2-2	nd	NA	6	NA	NA	NA	no	no
Europa	EU189	pssp	Alive	0	0.6	2	NA	NA	NA	nd	NA	NA	NA	NA	NA	no	no
Europa	EU189	pssp	Dead	6	NA	0	0.6	2	0.6-1.1	nd	NA	6	NA	NA	NA	no	no
Europa	EU19	pssp	Alive	0	4.4	4	NA	NA	NA	nd	NA	NA	NA	NA	NA	no	no
Europa	EU19	pssp	Alive	6	5.7	5	4.4	4	2.1-5	1	1.3	6	1.3	2.4248	growth	no	no
Europa	EU19	pssp	Dead	11	NA	0	5.7	5	> 5	nd	NA	5	NA	NA	NA	no	no
Europa	EU191	esp	Alive	0	1.1	2	NA	NA	NA	nd	NA	NA	NA	NA	NA	no	yes
Europa	EU191	esp	Alive	6	0.5	1	1.1	2	0.6-1.1	-1	-0.6	6	-0.6	2.24071	shrink	yes	yes
Europa	EU191	esp	Alive	11	0.9	2	0.5	1	< 0.6	1	0.4	5	0.48	2.34947	growth	yes	yes
Europa	EU191	esp	Alive	15	0.9	2	0.9	2	0.6-1.1	0	0	4	0	2.30259	no-growth	yes	yes
Europa	EU191	esp	Alive	20	1.9	3	0.9	2	0.6-1.1	1	1	5	1.2	2.41591	growth	yes	yes
Europa	EU191	esp	Dead	23	NA	0	1.9	3	1.2-2	nd	NA	3	NA	NA	NA	yes	yes
Europa	EU192	esp	Alive	0	1.6	3	NA	NA	NA	nd	NA	NA	NA	NA	NA	no	yes
Europa	EU192	esp	missing	6	NA	NA	NA	NA	NA	nd	NA	6	NA	NA	NA	no	yes
Europa	EU192	esp	Alive	11	1	2	1.6	3	1.2-2	-1	-0.6	11	-0.327273	2.26931	shrink	yes	yes
Europa	EU192	esp	Dead	15	NA	0	1	2	0.6-1.1	nd	NA	4	NA	NA	NA	yes	yes
Europa	EU193	esp	Alive	0	0.3	1	NA	NA	NA	nd	NA	NA	NA	NA	NA	no	no
Europa	EU193	esp	Dead	6	NA	0	0.3	1	< 0.6	nd	NA	6	NA	NA	NA	no	no
Europa	EU194	pssp	Alive	0	1.8	3	NA	NA	NA	nd	NA	NA	NA	NA	NA	no	yes
Europa	EU194	pssp	Alive	6	3.4	4	1.8	3	1.2-2	1	1.6	6	1.6	2.45101	growth	no	yes
Europa	EU194	pssp	Alive	11	3	4	3.4	4	2.1-5	0	-0.4	5	-0.48	2.25339	shrink	yes	yes
Europa	EU194	pssp	Alive	15	3	4	3	4	2.1-5	0	0	4	0	2.30259	no-growth	yes	yes
Europa	EU194	pssp	Alive	20	2.2	4	3	4	2.1-5	0	-0.8	5	-0.96	2.20166	shrink	yes	yes
Europa	EU194	pssp	Dead	23	NA	0	2.2	4	2.1-5	nd	NA	3	NA	NA	NA	yes	yes
Europa	EU195	pssp	Alive	0	1.8	3	NA	NA	NA	nd	NA	NA	NA	NA	NA	no	no
Europa	EU195	pssp	Dead	6	NA	0	1.8	3	1.2-2	nd	NA	6	NA	NA	NA	no	no
Europa	EU196	pssp	Alive	0	0.3	1	NA	NA	NA	nd	NA	NA	NA	NA	NA	no	no
Europa	EU196	pssp	missing	6	NA	NA	NA	NA	NA	nd	NA	6	NA	NA	NA	no	no
Europa	EU196	pssp	Alive	11	2.6	4	0.3	1	< 0.6	3	2.3	11	1.25455	2.42077	growth	no	no
Europa	EU196	pssp	Dead	15	NA	0	2.6	4	2.1-5	nd	NA	4	NA	NA	NA	no	no
Europa	EU197	pssp	Alive	0	0.3	1	NA	NA	NA	nd	NA	NA	NA	NA	NA	no	no
Europa	EU197	pssp	Dead	6	NA	0	0.3	1	< 0.6	nd	NA	6	NA	NA	NA	no	no
Europa	EU198	esp	Alive	0	0.3	1	NA	NA	NA	nd	NA	NA	NA	NA	NA	no	no
Europa	EU198	esp	Dead	6	NA	0	0.3	1	< 0.6	nd	NA	6	NA	NA	NA	no	no
Europa	EU199	pssp	Alive	0	0.3	1	NA	NA	NA	nd	NA	NA	NA	NA	NA	no	no
Europa	EU199	pssp	Dead	6	NA	0	0.3	1	< 0.6	nd	NA	6	NA	NA	NA	no	no
Europa	EU2	esp	Alive	0	1.2	3	NA	NA	NA	nd	NA	NA	NA	NA	NA	no	yes
Europa	EU2	esp	missing	6	NA	NA	NA	NA	NA	nd	NA	6	NA	NA	NA	no	yes
Europa	EU2	esp	Alive	11	1.1	2	1.2	3	1.2-2	-1	-0.1	11	-0.0545455	2.29712	shrink	yes	yes
Europa	EU2	esp	Dead	15	NA	0	1.1	2	0.6-1.1	nd	NA	4	NA	NA	NA	yes	yes
Europa	EU20	pssp	Alive	0	4.1	4	NA	NA	NA	nd	NA	NA	NA	NA	NA	no	no
Europa	EU20	pssp	Dead	6	NA	0	4.1	4	2.1-5	nd	NA	6	NA	NA	NA	no	no
Europa	EU200	esp	Alive	0	1.6	3	NA	NA	NA	nd	NA	NA	NA	NA	NA	no	no
Europa	EU200	esp	Alive	6	2.5	4	1.6	3	1.2-2	1	0.9	6	0.9	2.38876	growth	no	no
Europa	EU200	esp	Alive	11	3.2	4	2.5	4	2.1-5	0	0.7	5	0.84	2.38324	growth	no	no
Europa	EU200	esp	Alive	15	4.4	4	3.2	4	2.1-5	0	1.2	4	1.8	2.4681	growth	no	no
Europa	EU200	esp	Alive	20	5	4	4.4	4	2.1-5	0	0.6	5	0.72	2.37211	growth	no	no
Europa	EU200	esp	Dead	23	NA	0	5	4	2.1-5	nd	NA	3	NA	NA	NA	no	no
Europa	EU21	esp	Alive	0	1.4	3	NA	NA	NA	nd	NA	NA	NA	NA	NA	no	no
Europa	EU21	esp	missing	6	NA	NA	NA	NA	NA	nd	NA	6	NA	NA	NA	no	no
Europa	EU21	esp	Alive	11	1.5	3	1.4	3	1.2-2	0	0.1	11	0.0545455	2.30802	growth	no	no
Europa	EU21	esp	Dead	15	NA	0	1.5	3	1.2-2	nd	NA	4	NA	NA	NA	no	no
Europa	EU22	pssp	Alive	0	1.3	3	NA	NA	NA	nd	NA	NA	NA	NA	NA	no	no
Europa	EU22	pssp	Dead	6	NA	0	1.3	3	1.2-2	nd	NA	6	NA	NA	NA	no	no
Europa	EU23	esp	Alive	0	0.3	1	NA	NA	NA	nd	NA	NA	NA	NA	NA	no	no
Europa	EU23	esp	Alive	6	0.6	2	0.3	1	< 0.6	1	0.3	6	0.3	2.33214	growth	no	no
Europa	EU23	esp	Dead	11	NA	0	0.6	2	0.6-1.1	nd	NA	5	NA	NA	NA	no	no
Europa	EU24	esp	Alive	0	0.5	1	NA	NA	NA	nd	NA	NA	NA	NA	NA	no	no
Europa	EU24	esp	Dead	6	NA	0	0.5	1	< 0.6	nd	NA	6	NA	NA	NA	no	no
Europa	EU25	pssp	Alive	0	1.8	3	NA	NA	NA	nd	NA	NA	NA	NA	NA	no	no
Europa	EU25	pssp	Dead	6	NA	0	1.8	3	1.2-2	nd	NA	6	NA	NA	NA	no	no
Europa	EU26	pssp	Alive	0	2.8	4	NA	NA	NA	nd	NA	NA	NA	NA	NA	no	no
Europa	EU26	pssp	Dead	6	NA	0	2.8	4	2.1-5	nd	NA	6	NA	NA	NA	no	no
Europa	EU27	esp	Alive	0	2.4	4	NA	NA	NA	nd	NA	NA	NA	NA	NA	no	no
Europa	EU27	esp	Alive	6	2.9	4	2.4	4	2.1-5	0	0.5	6	0.5	2.35138	growth	no	no
Europa	EU27	esp	Alive	11	2.9	4	2.9	4	2.1-5	0	0	5	0	2.30259	no-growth	no	no
Europa	EU27	esp	Dead	15	NA	0	2.9	4	2.1-5	nd	NA	4	NA	NA	NA	no	no
Europa	EU28	esp	Alive	0	3.2	4	NA	NA	NA	nd	NA	NA	NA	NA	NA	no	no
Europa	EU28	esp	Dead	6	NA	0	3.2	4	2.1-5	nd	NA	6	NA	NA	NA	no	no
Europa	EU29	esp	Alive	0	0.3	1	NA	NA	NA	nd	NA	NA	NA	NA	NA	no	no
Europa	EU29	esp	Dead	6	NA	0	0.3	1	< 0.6	nd	NA	6	NA	NA	NA	no	no
Europa	EU3	pssp	Alive	0	1.2	3	NA	NA	NA	nd	NA	NA	NA	NA	NA	no	no
Europa	EU3	pssp	missing	6	NA	NA	NA	NA	NA	nd	NA	6	NA	NA	NA	no	no
Europa	EU3	pssp	Alive	11	2.6	4	1.2	3	1.2-2	1	1.4	11	0.763636	2.37617	growth	no	no
Europa	EU3	pssp	Dead	15	NA	0	2.6	4	2.1-5	nd	NA	4	NA	NA	NA	no	no
Europa	EU30	esp	Alive	0	1.7	3	NA	NA	NA	nd	NA	NA	NA	NA	NA	no	yes
Europa	EU30	esp	Alive	6	1.4	3	1.7	3	1.2-2	0	-0.3	6	-0.3	2.27213	shrink	yes	yes
Europa	EU30	esp	Dead	11	NA	0	1.4	3	1.2-2	nd	NA	5	NA	NA	NA	yes	yes
Europa	EU31	esp	Alive	0	1.8	3	NA	NA	NA	nd	NA	NA	NA	NA	NA	no	no
Europa	EU31	esp	Dead	6	NA	0	1.8	3	1.2-2	nd	NA	6	NA	NA	NA	no	no
Europa	EU32	pssp	Alive	0	0.3	1	NA	NA	NA	nd	NA	NA	NA	NA	NA	no	no
Europa	EU32	pssp	Dead	6	NA	0	0.3	1	< 0.6	nd	NA	6	NA	NA	NA	no	no
Europa	EU33	esp	Alive	0	2.9	4	NA	NA	NA	nd	NA	NA	NA	NA	NA	no	yes
Europa	EU33	esp	Alive	6	1.8	3	2.9	4	2.1-5	-1	-1.1	6	-1.1	2.18605	shrink	yes	yes
Europa	EU33	esp	Dead	11	NA	0	1.8	3	1.2-2	nd	NA	5	NA	NA	NA	yes	yes
Europa	EU34	pssp	Alive	0	1	2	NA	NA	NA	nd	NA	NA	NA	NA	NA	no	no
Europa	EU34	pssp	Dead	6	NA	0	1	2	0.6-1.1	nd	NA	6	NA	NA	NA	no	no
Europa	EU35	esp	Alive	0	0.7	2	NA	NA	NA	nd	NA	NA	NA	NA	NA	no	no
Europa	EU35	esp	Dead	6	NA	0	0.7	2	0.6-1.1	nd	NA	6	NA	NA	NA	no	no
Europa	EU36	esp	Alive	0	0.3	1	NA	NA	NA	nd	NA	NA	NA	NA	NA	no	no
Europa	EU36	esp	Alive	6	0.7	2	0.3	1	< 0.6	1	0.4	6	0.4	2.34181	growth	no	no
Europa	EU36	esp	Alive	11	0.9	2	0.7	2	0.6-1.1	0	0.2	5	0.24	2.3263	growth	no	no
Europa	EU36	esp	missing	15	NA	NA	0.9	2	0.6-1.1	nd	NA	4	NA	NA	NA	no	no
Europa	EU37	esp	Alive	0	3.5	4	NA	NA	NA	nd	NA	NA	NA	NA	NA	no	no
Europa	EU37	esp	Dead	6	NA	0	3.5	4	2.1-5	nd	NA	6	NA	NA	NA	no	no
Europa	EU38	pssp	Alive	0	1.2	3	NA	NA	NA	nd	NA	NA	NA	NA	NA	no	yes
Europa	EU38	pssp	Alive	6	1.6	3	1.2	3	1.2-2	0	0.4	6	0.4	2.34181	growth	no	yes
Europa	EU38	pssp	Alive	11	0.7	2	1.6	3	1.2-2	-1	-0.9	5	-1.08	2.1883	shrink	yes	yes
Europa	EU38	pssp	missing	15	NA	NA	0.7	2	0.6-1.1	nd	NA	4	NA	NA	NA	yes	yes
Europa	EU39	esp	Alive	0	1.4	3	NA	NA	NA	nd	NA	NA	NA	NA	NA	no	no
Europa	EU39	esp	Alive	6	1.7	3	1.4	3	1.2-2	0	0.3	6	0.3	2.33214	growth	no	no
Europa	EU39	esp	Dead	11	NA	0	1.7	3	1.2-2	nd	NA	5	NA	NA	NA	no	no
Europa	EU4	esp	Alive	0	1.3	3	NA	NA	NA	nd	NA	NA	NA	NA	NA	no	no
Europa	EU4	esp	Dead	6	NA	0	1.3	3	1.2-2	nd	NA	6	NA	NA	NA	no	no
Europa	EU40	pssp	Alive	0	0.7	2	NA	NA	NA	nd	NA	NA	NA	NA	NA	no	no
Europa	EU40	pssp	Dead	6	NA	0	0.7	2	0.6-1.1	nd	NA	6	NA	NA	NA	no	no
Europa	EU41	pssp	Alive	0	0.3	1	NA	NA	NA	nd	NA	NA	NA	NA	NA	no	no
Europa	EU41	pssp	Dead	6	NA	0	0.3	1	< 0.6	nd	NA	6	NA	NA	NA	no	no
Europa	EU42	pssp	Alive	0	0.3	1	NA	NA	NA	nd	NA	NA	NA	NA	NA	no	no
Europa	EU42	pssp	Dead	6	NA	0	0.3	1	< 0.6	nd	NA	6	NA	NA	NA	no	no
Europa	EU43	pssp	Alive	0	1.7	3	NA	NA	NA	nd	NA	NA	NA	NA	NA	no	no
Europa	EU43	pssp	Alive	6	1.7	3	1.7	3	1.2-2	0	0	6	0	2.30259	no-growth	no	no
Europa	EU43	pssp	Alive	11	1.7	3	1.7	3	1.2-2	0	0	5	0	2.30259	no-growth	no	no
Europa	EU43	pssp	Alive	15	1.7	3	1.7	3	1.2-2	0	0	4	0	2.30259	no-growth	no	no
Europa	EU43	pssp	Dead	20	NA	0	1.7	3	1.2-2	nd	NA	5	NA	NA	NA	no	no
Europa	EU44	pssp	Alive	0	1.2	3	NA	NA	NA	nd	NA	NA	NA	NA	NA	no	no
Europa	EU44	pssp	Dead	6	NA	0	1.2	3	1.2-2	nd	NA	6	NA	NA	NA	no	no
Europa	EU45	esp	Alive	0	2	3	NA	NA	NA	nd	NA	NA	NA	NA	NA	no	no
Europa	EU45	esp	Dead	6	NA	0	2	3	1.2-2	nd	NA	6	NA	NA	NA	no	no
Europa	EU46	pssp	Alive	0	2.1	4	NA	NA	NA	nd	NA	NA	NA	NA	NA	no	no
Europa	EU46	pssp	Alive	6	2.3	4	2.1	4	2.1-5	0	0.2	6	0.2	2.32239	growth	no	no
Europa	EU46	pssp	missing	11	NA	NA	2.3	4	2.1-5	nd	NA	5	NA	NA	NA	no	no
Europa	EU47	pssp	Alive	0	1.6	3	NA	NA	NA	nd	NA	NA	NA	NA	NA	no	yes
Europa	EU47	pssp	Alive	6	0.7	2	1.6	3	1.2-2	-1	-0.9	6	-0.9	2.20827	shrink	yes	yes
Europa	EU47	pssp	Alive	11	1.1	2	0.7	2	0.6-1.1	0	0.4	5	0.48	2.34947	growth	yes	yes
Europa	EU47	pssp	Dead	15	NA	0	1.1	2	0.6-1.1	nd	NA	4	NA	NA	NA	yes	yes
Europa	EU48	esp	Alive	0	1	2	NA	NA	NA	nd	NA	NA	NA	NA	NA	no	no
Europa	EU48	esp	Dead	6	NA	0	1	2	0.6-1.1	nd	NA	6	NA	NA	NA	no	no
Europa	EU49	esp	Alive	0	0.8	2	NA	NA	NA	nd	NA	NA	NA	NA	NA	no	no
Europa	EU49	esp	Dead	6	NA	0	0.8	2	0.6-1.1	nd	NA	6	NA	NA	NA	no	no
Europa	EU5	esp	Alive	0	1.4	3	NA	NA	NA	nd	NA	NA	NA	NA	NA	no	yes
Europa	EU5	esp	missing	6	NA	NA	1.4	3	1.2-2	nd	NA	6	NA	NA	NA	no	yes
Europa	EU5	esp	missing	11	NA	NA	NA	NA	NA	nd	NA	5	NA	NA	NA	no	yes
Europa	EU5	esp	missing	15	NA	NA	NA	NA	NA	nd	NA	4	NA	NA	NA	no	yes
Europa	EU5	esp	missing	20	NA	NA	NA	NA	NA	nd	NA	5	NA	NA	NA	no	yes
Europa	EU5	esp	Alive	23	3.7	4	1.4	3	1.2-2	1	2.3	23	0.6	2.36085	growth	no	yes
Europa	EU5	esp	Alive	31	3.2	4	3.7	4	2.1-5	0	-0.5	8	-0.375	2.26436	shrink	yes	yes
Europa	EU5	esp	Dead	36	NA	0	3.2	4	2.1-5	nd	NA	5	NA	NA	NA	yes	yes
Europa	EU50	esp	Alive	0	0.6	2	NA	NA	NA	nd	NA	NA	NA	NA	NA	no	no
Europa	EU50	esp	Dead	6	NA	0	0.6	2	0.6-1.1	nd	NA	6	NA	NA	NA	no	no
Europa	EU51	esp	Alive	0	1.2	3	NA	NA	NA	nd	NA	NA	NA	NA	NA	no	no
Europa	EU51	esp	Dead	6	NA	0	1.2	3	1.2-2	nd	NA	6	NA	NA	NA	no	no
Europa	EU52	pssp	Alive	0	0.8	2	NA	NA	NA	nd	NA	NA	NA	NA	NA	no	yes
Europa	EU52	pssp	Alive	6	0.8	2	0.8	2	0.6-1.1	0	0	6	0	2.30259	no-growth	no	yes
Europa	EU52	pssp	Alive	11	0.8	2	0.8	2	0.6-1.1	0	0	5	0	2.30259	no-growth	no	yes
Europa	EU52	pssp	Alive	15	0.5	1	0.8	2	0.6-1.1	-1	-0.3	4	-0.45	2.25654	shrink	yes	yes
Europa	EU52	pssp	Dead	20	NA	0	0.5	1	< 0.6	nd	NA	5	NA	NA	NA	yes	yes
Europa	EU53	esp	Alive	0	0.8	2	NA	NA	NA	nd	NA	NA	NA	NA	NA	no	no
Europa	EU53	esp	Dead	6	NA	0	0.8	2	0.6-1.1	nd	NA	6	NA	NA	NA	no	no
Europa	EU55	esp	Alive	0	0.5	1	NA	NA	NA	nd	NA	NA	NA	NA	NA	no	yes
Europa	EU55	esp	missing	6	NA	NA	NA	NA	NA	nd	NA	6	NA	NA	NA	no	yes
Europa	EU55	esp	Alive	11	0.4	1	0.5	1	< 0.6	0	-0.1	11	-0.0545455	2.29712	shrink	yes	yes
Europa	EU55	esp	Dead	15	NA	0	0.4	1	< 0.6	nd	NA	4	NA	NA	NA	yes	yes
Europa	EU57	pssp	Alive	0	1.6	3	NA	NA	NA	nd	NA	NA	NA	NA	NA	no	no
Europa	EU57	pssp	Dead	6	NA	0	1.6	3	1.2-2	nd	NA	6	NA	NA	NA	no	no
Europa	EU58	esp	Alive	0	1.8	3	NA	NA	NA	nd	NA	NA	NA	NA	NA	no	yes
Europa	EU58	esp	Alive	6	1.6	3	1.8	3	1.2-2	0	-0.2	6	-0.2	2.28238	shrink	yes	yes
Europa	EU58	esp	Alive	11	3.2	4	1.6	3	1.2-2	1	1.6	5	1.92	2.47822	growth	yes	yes
Europa	EU58	esp	Alive	15	3.8	4	3.2	4	2.1-5	0	0.6	4	0.9	2.38876	growth	yes	yes
Europa	EU58	esp	Alive	20	3.3	4	3.8	4	2.1-5	0	-0.5	5	-0.6	2.24071	shrink	yes	yes
Europa	EU58	esp	Alive	23	3.4	4	3.3	4	2.1-5	0	0.1	3	0.2	2.32239	growth	yes	yes
Europa	EU58	esp	Alive	31	2	3	3.4	4	2.1-5	-1	-1.4	8	-1.05	2.19165	shrink	yes	yes
Europa	EU58	esp	Dead	36	NA	0	2	3	1.2-2	nd	NA	5	NA	NA	NA	yes	yes
Europa	EU59	esp	Alive	0	2.2	4	NA	NA	NA	nd	NA	NA	NA	NA	NA	no	yes
Europa	EU59	esp	Alive	6	1	2	2.2	4	2.1-5	-2	-1.2	6	-1.2	2.17475	shrink	yes	yes
Europa	EU59	esp	Dead	11	NA	0	1	2	0.6-1.1	nd	NA	5	NA	NA	NA	yes	yes
Europa	EU6	pssp	Alive	0	3.6	4	NA	NA	NA	nd	NA	NA	NA	NA	NA	no	yes
Europa	EU6	pssp	Alive	6	0.6	2	3.6	4	2.1-5	-2	-3	6	-3	1.94591	shrink	yes	yes
Europa	EU6	pssp	Dead	11	NA	0	0.6	2	0.6-1.1	nd	NA	5	NA	NA	NA	yes	yes
Europa	EU60	esp	Alive	0	1.2	3	NA	NA	NA	nd	NA	NA	NA	NA	NA	no	no
Europa	EU60	esp	Dead	6	NA	0	1.2	3	1.2-2	nd	NA	6	NA	NA	NA	no	no
Europa	EU61	esp	Alive	0	0.5	1	NA	NA	NA	nd	NA	NA	NA	NA	NA	no	no
Europa	EU61	esp	Dead	6	NA	0	0.5	1	< 0.6	nd	NA	6	NA	NA	NA	no	no
Europa	EU63	pssp	Alive	0	1.2	3	NA	NA	NA	nd	NA	NA	NA	NA	NA	no	no
Europa	EU63	pssp	Dead	6	NA	0	1.2	3	1.2-2	nd	NA	6	NA	NA	NA	no	no
Europa	EU64	pssp	Alive	0	0.5	1	NA	NA	NA	nd	NA	NA	NA	NA	NA	no	no
Europa	EU64	pssp	Alive	6	0.5	1	0.5	1	< 0.6	0	0	6	0	2.30259	no-growth	no	no
Europa	EU64	pssp	Dead	11	NA	0	0.5	1	< 0.6	nd	NA	5	NA	NA	NA	no	no
Europa	EU65	pssp	Alive	0	1.6	3	NA	NA	NA	nd	NA	NA	NA	NA	NA	no	yes
Europa	EU65	pssp	missing	6	NA	NA	NA	NA	NA	nd	NA	6	NA	NA	NA	no	yes
Europa	EU65	pssp	Alive	11	1.9	3	1.6	3	1.2-2	0	0.3	11	0.163636	2.31882	growth	no	yes
Europa	EU65	pssp	Alive	15	3.2	4	1.9	3	1.2-2	1	1.3	4	1.95	2.48073	growth	no	yes
Europa	EU65	pssp	Alive	20	1.2	3	3.2	4	2.1-5	-1	-2	5	-2.4	2.02815	shrink	yes	yes
Europa	EU65	pssp	Alive	23	0.5	1	1.2	3	1.2-2	-2	-0.7	3	-1.4	2.15176	shrink	yes	yes
Europa	EU65	pssp	Dead	31	NA	0	0.5	1	< 0.6	nd	NA	8	NA	NA	NA	yes	yes
Europa	EU67	pssp	Alive	0	2.4	4	NA	NA	NA	nd	NA	NA	NA	NA	NA	no	no
Europa	EU67	pssp	Dead	6	NA	0	2.4	4	2.1-5	nd	NA	6	NA	NA	NA	no	no
Europa	EU68	pssp	Alive	0	0.5	1	NA	NA	NA	nd	NA	NA	NA	NA	NA	no	no
Europa	EU68	pssp	Dead	6	NA	0	0.5	1	< 0.6	nd	NA	6	NA	NA	NA	no	no
Europa	EU69	pssp	Alive	0	2.5	4	NA	NA	NA	nd	NA	NA	NA	NA	NA	no	no
Europa	EU69	pssp	Dead	6	NA	0	2.5	4	2.1-5	nd	NA	6	NA	NA	NA	no	no
Europa	EU7	esp	Alive	0	0.3	1	NA	NA	NA	nd	NA	NA	NA	NA	NA	no	no
Europa	EU7	esp	Dead	6	NA	0	0.3	1	< 0.6	nd	NA	6	NA	NA	NA	no	no
Europa	EU70	pssp	Alive	0	1.2	3	NA	NA	NA	nd	NA	NA	NA	NA	NA	no	no
Europa	EU70	pssp	Dead	6	NA	0	1.2	3	1.2-2	nd	NA	6	NA	NA	NA	no	no
Europa	EU72	esp	Alive	0	2.8	4	NA	NA	NA	nd	NA	NA	NA	NA	NA	no	no
Europa	EU72	esp	Dead	6	NA	0	2.8	4	2.1-5	nd	NA	6	NA	NA	NA	no	no
Europa	EU74	pssp	Alive	0	2.7	4	NA	NA	NA	nd	NA	NA	NA	NA	NA	no	no
Europa	EU74	pssp	missing	6	NA	NA	2.7	4	2.1-5	nd	NA	6	NA	NA	NA	no	no
Europa	EU75	pssp	Alive	0	2.8	4	NA	NA	NA	nd	NA	NA	NA	NA	NA	no	no
Europa	EU75	pssp	Alive	6	4	4	2.8	4	2.1-5	0	1.2	6	1.2	2.41591	growth	no	no
Europa	EU75	pssp	missing	11	NA	NA	4	4	2.1-5	nd	NA	5	NA	NA	NA	no	no
Europa	EU76	pssp	Alive	0	0.5	1	NA	NA	NA	nd	NA	NA	NA	NA	NA	no	no
Europa	EU76	pssp	Alive	6	0.7	2	0.5	1	< 0.6	1	0.2	6	0.2	2.32239	growth	no	no
Europa	EU76	pssp	Alive	11	1.4	3	0.7	2	0.6-1.1	1	0.7	5	0.84	2.38324	growth	no	no
Europa	EU76	pssp	Dead	15	NA	0	1.4	3	1.2-2	nd	NA	4	NA	NA	NA	no	no
Europa	EU77	esp	Alive	0	0.5	1	NA	NA	NA	nd	NA	NA	NA	NA	NA	no	yes
Europa	EU77	esp	Alive	6	2.7	4	0.5	1	< 0.6	3	2.2	6	2.2	2.50144	growth	no	yes
Europa	EU77	esp	Alive	11	1.2	3	2.7	4	2.1-5	-1	-1.5	5	-1.8	2.10413	shrink	yes	yes
Europa	EU77	esp	Alive	15	1.2	3	1.2	3	1.2-2	0	0	4	0	2.30259	no-growth	yes	yes
Europa	EU77	esp	Alive	20	2.2	4	1.2	3	1.2-2	1	1	5	1.2	2.41591	growth	yes	yes
Europa	EU77	esp	Alive	23	1.7	3	2.2	4	2.1-5	-1	-0.5	3	-1	2.19722	shrink	yes	yes
Europa	EU77	esp	Alive	31	2.6	4	1.7	3	1.2-2	1	0.9	8	0.675	2.3679	growth	yes	yes
Europa	EU77	esp	Alive	36	3.5	4	2.6	4	2.1-5	0	0.9	5	1.08	2.40514	growth	yes	yes
Europa	EU78	esp	Alive	0	1.5	3	3.5	4	2.1-5	-1	NA	NA	NA	NA	NA	no	yes
Europa	EU78	esp	Alive	6	1.3	3	1.5	3	1.2-2	0	-0.2	6	-0.2	2.28238	shrink	yes	yes
Europa	EU78	esp	Alive	11	1.1	2	1.3	3	1.2-2	-1	-0.2	5	-0.24	2.27829	shrink	yes	yes
Europa	EU78	esp	Alive	15	1.1	2	1.1	2	0.6-1.1	0	0	4	0	2.30259	no-growth	yes	yes
Europa	EU78	esp	Dead	20	NA	0	1.1	2	0.6-1.1	nd	NA	5	NA	NA	NA	yes	yes
Europa	EU79	pssp	Alive	0	1.8	3	NA	NA	NA	nd	NA	NA	NA	NA	NA	no	no
Europa	EU79	pssp	Alive	6	2.2	4	1.8	3	1.2-2	1	0.4	6	0.4	2.34181	growth	no	no
Europa	EU79	pssp	Dead	11	NA	0	2.2	4	2.1-5	nd	NA	5	NA	NA	NA	no	no
Europa	EU8	esp	Alive	0	3.8	4	NA	NA	NA	nd	NA	NA	NA	NA	NA	no	yes
Europa	EU8	esp	missing	6	NA	NA	NA	NA	NA	nd	NA	6	NA	NA	NA	no	yes
Europa	EU8	esp	Alive	11	2.3	4	3.8	4	2.1-5	0	-1.5	11	-0.818182	2.21723	shrink	yes	yes
Europa	EU8	esp	Dead	15	NA	0	2.3	4	2.1-5	nd	NA	4	NA	NA	NA	yes	yes
Europa	EU80	pssp	Alive	0	1.5	3	NA	NA	NA	nd	NA	NA	NA	NA	NA	no	no
Europa	EU80	pssp	Dead	6	NA	0	1.5	3	1.2-2	nd	NA	6	NA	NA	NA	no	no
Europa	EU82	esp	Alive	0	2	3	NA	NA	NA	nd	NA	NA	NA	NA	NA	no	yes
Europa	EU82	esp	Alive	6	2.1	4	2	3	1.2-2	1	0.1	6	0.1	2.31254	growth	no	yes
Europa	EU82	esp	Alive	11	3.2	4	2.1	4	2.1-5	0	1.1	5	1.32	2.42657	growth	no	yes
Europa	EU82	esp	Alive	15	1.6	3	3.2	4	2.1-5	-1	-1.6	4	-2.4	2.02815	shrink	yes	yes
Europa	EU82	esp	missing	20	NA	NA	1.6	3	1.2-2	nd	NA	5	NA	NA	NA	yes	yes
Europa	EU83	esp	Alive	0	1.7	3	NA	NA	NA	nd	NA	NA	NA	NA	NA	no	no
Europa	EU83	esp	missing	6	NA	NA	1.7	3	1.2-2	nd	NA	6	NA	NA	NA	no	no
Europa	EU84	esp	Alive	0	0.7	2	NA	NA	NA	nd	NA	NA	NA	NA	NA	no	no
Europa	EU84	esp	missing	6	NA	NA	0.7	2	0.6-1.1	nd	NA	6	NA	NA	NA	no	no
Europa	EU85	esp	Alive	0	1.8	3	NA	NA	NA	nd	NA	NA	NA	NA	NA	no	no
Europa	EU85	esp	missing	6	NA	NA	1.8	3	1.2-2	nd	NA	6	NA	NA	NA	no	no
Europa	EU86	pssp	Alive	0	0.7	2	NA	NA	NA	nd	NA	NA	NA	NA	NA	no	no
Europa	EU86	pssp	missing	6	NA	NA	0.7	2	0.6-1.1	nd	NA	6	NA	NA	NA	no	no
Europa	EU87	pssp	Alive	0	1.1	2	NA	NA	NA	nd	NA	NA	NA	NA	NA	no	no
Europa	EU87	pssp	missing	6	NA	NA	1.1	2	0.6-1.1	nd	NA	6	NA	NA	NA	no	no
Europa	EU88	esp	Alive	0	1.3	3	NA	NA	NA	nd	NA	NA	NA	NA	NA	no	no
Europa	EU88	esp	missing	6	NA	NA	1.3	3	1.2-2	nd	NA	6	NA	NA	NA	no	no
Europa	EU9	esp	Alive	0	0.3	1	NA	NA	NA	nd	NA	NA	NA	NA	NA	no	no
Europa	EU9	esp	Dead	6	NA	0	0.3	1	< 0.6	nd	NA	6	NA	NA	NA	no	no
Europa	EU90	esp	Alive	0	0.7	2	NA	NA	NA	nd	NA	NA	NA	NA	NA	no	no
Europa	EU90	esp	missing	6	NA	NA	0.7	2	0.6-1.1	nd	NA	6	NA	NA	NA	no	no
Europa	EU92	esp	Alive	0	0.8	2	NA	NA	NA	nd	NA	NA	NA	NA	NA	no	no
Europa	EU92	esp	missing	6	NA	NA	0.8	2	0.6-1.1	nd	NA	6	NA	NA	NA	no	no
Europa	EU93	esp	Alive	0	1.8	3	NA	NA	NA	nd	NA	NA	NA	NA	NA	no	no
Europa	EU93	esp	missing	6	NA	NA	1.8	3	1.2-2	nd	NA	6	NA	NA	NA	no	no
Europa	EU94	pssp	Alive	0	0.6	2	NA	NA	NA	nd	NA	NA	NA	NA	NA	no	no
Europa	EU94	pssp	missing	6	NA	NA	0.6	2	0.6-1.1	nd	NA	6	NA	NA	NA	no	no
Europa	EU95	esp	Alive	0	2.5	4	NA	NA	NA	nd	NA	NA	NA	NA	NA	no	no
Europa	EU95	esp	missing	6	NA	NA	2.5	4	2.1-5	nd	NA	6	NA	NA	NA	no	no
Europa	EU96	pssp	Alive	0	2.7	4	NA	NA	NA	nd	NA	NA	NA	NA	NA	no	no
Europa	EU96	pssp	missing	6	NA	NA	2.7	4	2.1-5	nd	NA	6	NA	NA	NA	no	no
Europa	EU97	esp	Alive	0	2.8	4	NA	NA	NA	nd	NA	NA	NA	NA	NA	no	no
Europa	EU97	esp	missing	6	NA	NA	2.8	4	2.1-5	nd	NA	6	NA	NA	NA	no	no
Europa	EU98	pssp	Alive	0	1.7	3	NA	NA	NA	nd	NA	NA	NA	NA	NA	no	no
Europa	EU98	pssp	missing	6	NA	NA	1.7	3	1.2-2	nd	NA	6	NA	NA	NA	no	no
